# Supplementary material for: Interaction between Microalgae P. tricornutum and Bacteria Thalassospira sp. for Removal of Bisphenols from Conditioned Media
Source: MDPI journal article supplement (doi:10.3390/ijms23158447), 2022-07-30
Supplement: s1 [file s1]

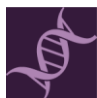

Supplementary Material Škufca et al.

**Table S1.** Bisphenol compound abbreviations, International Union of Pure and Applied Chemistry (IUPAC) names and Chemical Abstract Services (CAS) identifiers.

| Abbreviation | IUPAC name                                                         | CAS        |
|--------------|--------------------------------------------------------------------|------------|
| BPA          | 4-[2-(4-hydroxyphenyl)propan-2-yl]phenol                           | 80-05-7    |
| 2,2'-BPF     | 2-[(2-hydroxyphenyl)methyl]phenol                                  | 2467-02-9  |
| 2,4'-BPF     | 2-[(4-hydroxyphenyl)methyl]phenol                                  | 2467-03-0  |
| 4,4'-BPF     | 4-[(4-hydroxyphenyl)methyl]phenol                                  | 620-92-8   |
| BP26DM       | 4-[2-(4-hydroxy-3,5-dimethylphenyl)propan-2-yl]-2,6-dimethylphenol | 5613-46-7  |
| BPAF         | 4-[1,1,1,3,3,3-Hexafluoro-2-(4-hydroxyphenyl)propan-2-yl]phenol    | 1478-61-1  |
| BPAP         | 4-[1-(4-hydroxyphenyl)-1-phenylethyl]phenol                        | 1571-75-1  |
| BPB          | 4-[2-(4-hydroxyphenyl)butan-2-yl]phenol                            | 77-40-7    |
| BPBP         | 4-[(4-hydroxyphenyl)-diphenylmethyl]phenol                         | 1844-01-5  |
| BPC          | 4-[2-(4-hydroxy-3-methylphenyl)propan-2-yl]-2-methylphenol         | 79-97-0    |
| BPC2         | 4-[2,2-dichloro-1-(4-hydroxyphenyl)ethenyl]phenol                  | 14868-03-2 |
| BPE          | 4-[1-(4-hydroxyphenyl)ethyl]phenol                                 | 2081-08-5  |
| BPFL         | 4-[9-(4-hydroxyphenyl)fluoren-9-yl]phenol                          | 3236-71-3  |
| BPM          | 4-[2-[3-[2-(4-hydroxyphenyl)propan-2-yl]phenyl]propan-2-yl]phenol  | 13595-25-0 |
| BPP          | 4-[2-[4-[2-(4-hydroxyphenyl)propan-2-yl]phenyl]propan-2-yl]phenol  | 2167-51-3  |
| BPPH         | 4-[2-(4-hydroxy-3-phenylphenyl)propan-2-yl]-2-phenylphenol         | 24038-68-4 |
| BPS          | 4-(4-hydroxyphenyl)sulfonylphenol                                  | 80-09-1    |
| BPZ          | 4-[1-(4-hydroxyphenyl)cyclohexyl]phenol                            | 843-55-0   |

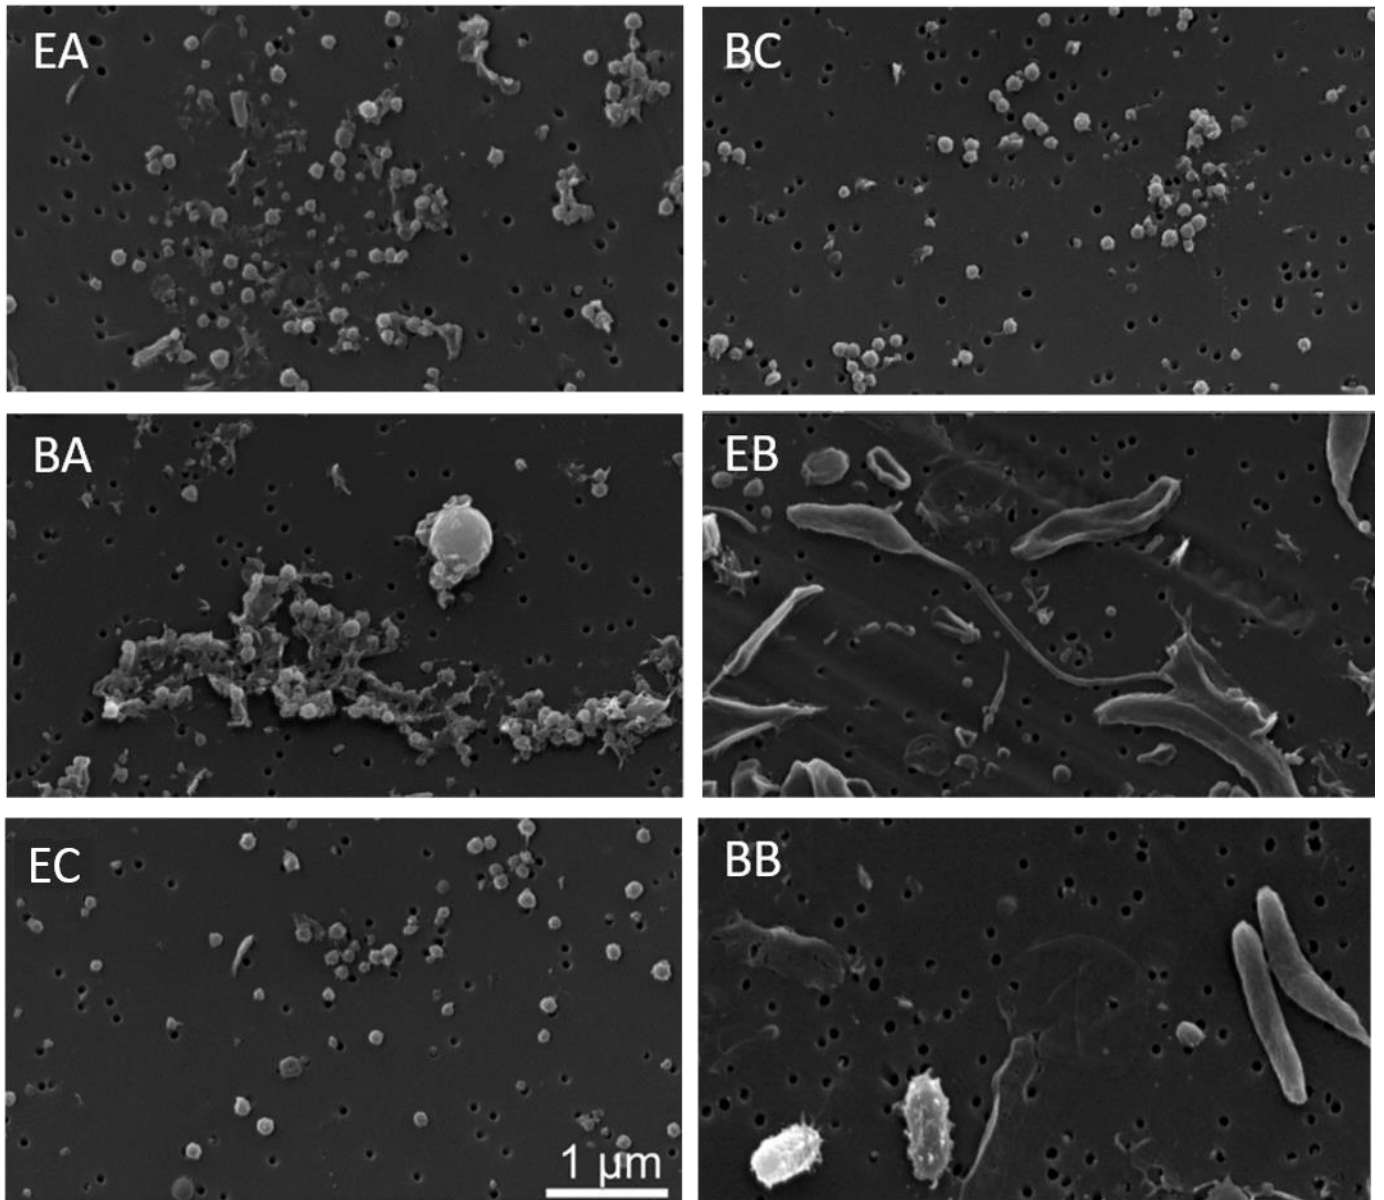

**Figure S1.** Additional SEM images of SCP isolates from EA, BA, EC, BC, EB and BB cultures. Experimental series (addition of BPs): axenic microalgae (EA), co-culture of microalgae and bacteria (EC), and bacterial culture (EB). Blank control series (no addition of BPs): axenic microalgae (BA), co-culture of microalgae and bacteria (BC), and bacterial culture (BB).

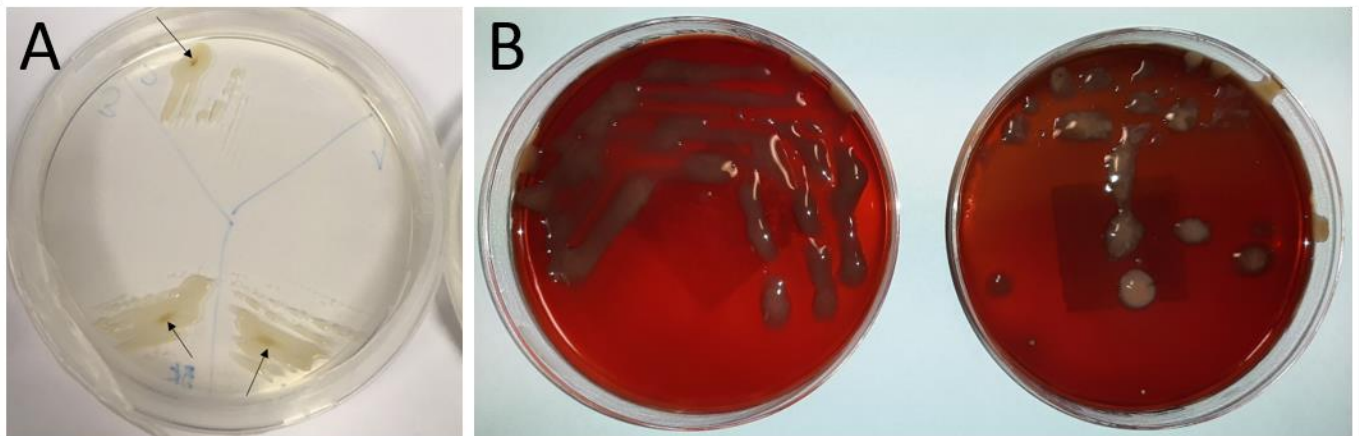

**Figure S2. A:** Co-culture sample grown on an 1% MW-LB agar, showing growth of bacteria, with microalgae *P. tricornutum* growth in the middle of bacterial growth (arrows). **B:** pre-cultures of bacteria on BD Columbia agar containing 5% sheep blood.

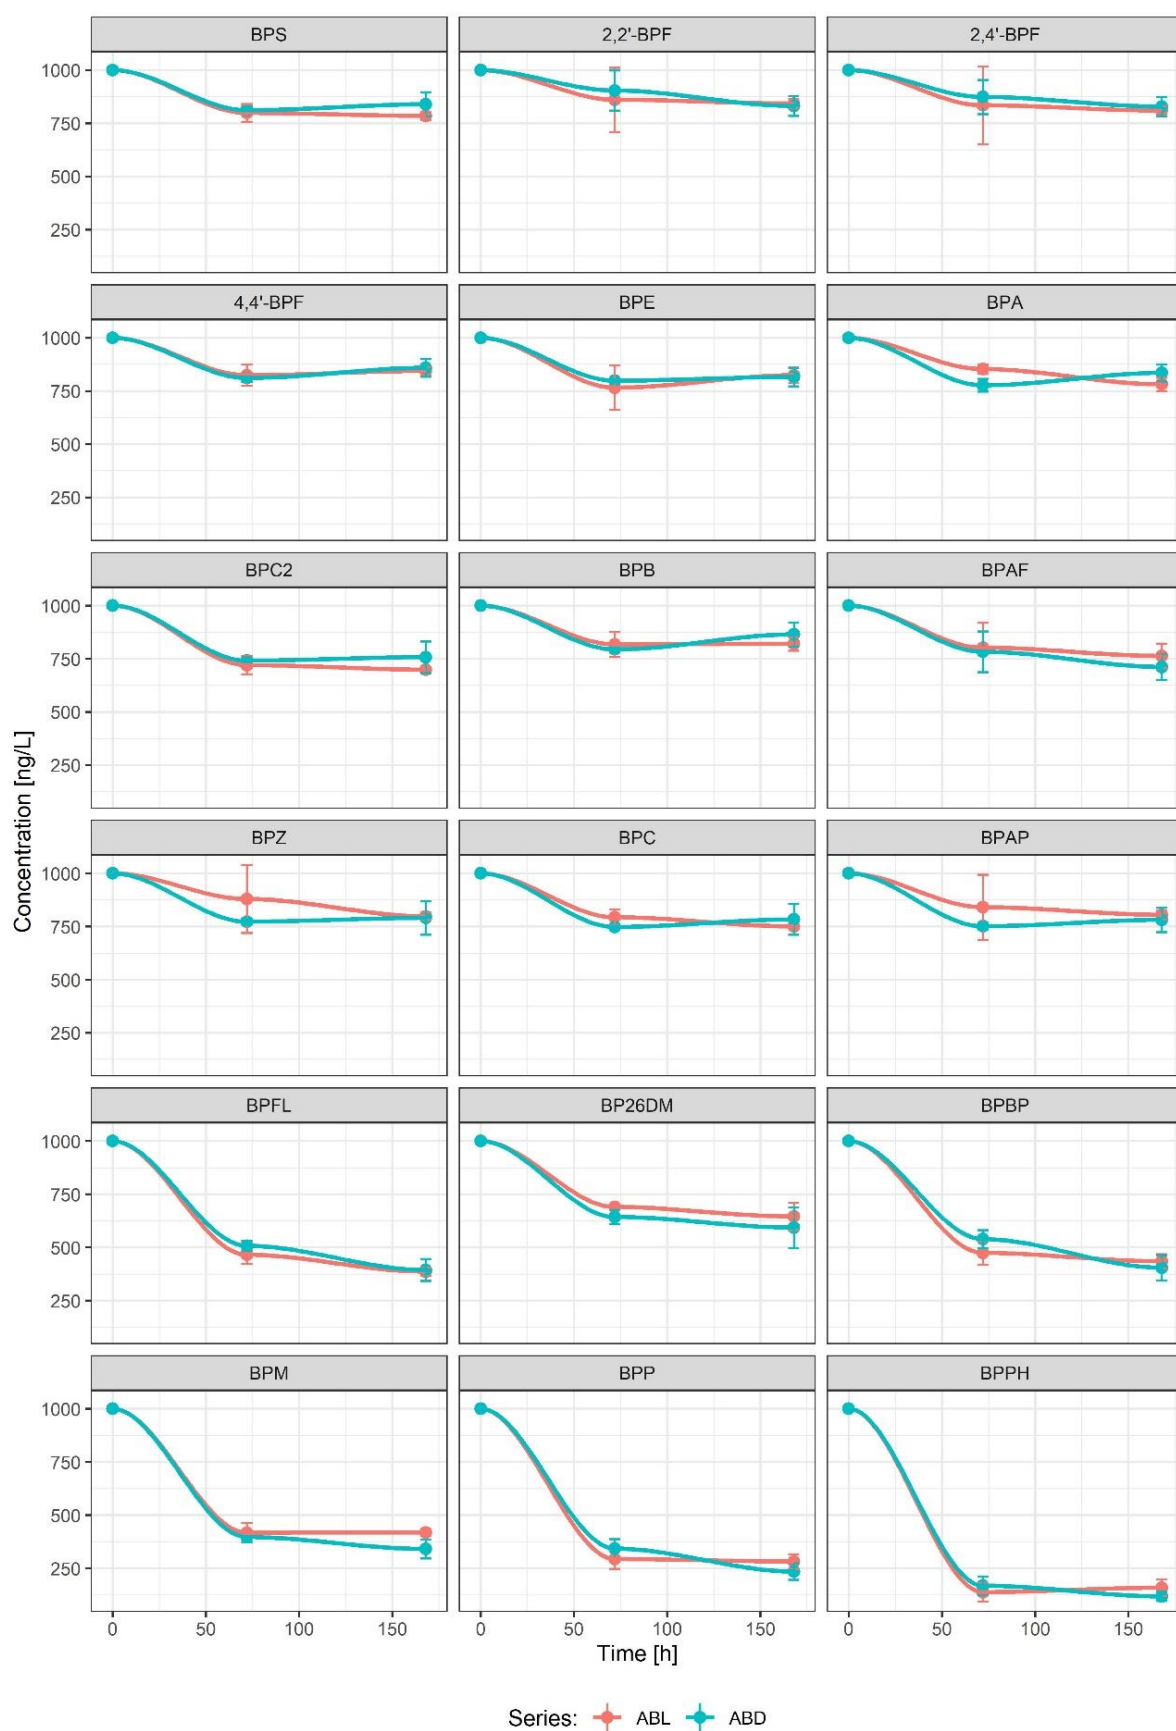

**Figure S3.** Concentration of 18 BPs in light (ABL) and dark (ABD) abiotic conditions. The mean (dot) and standard deviation (error-bars) are shown (n=3). Compounds are arranged from lowest (BPS, log P = 2.3) to highest (BPPH, log P = 7.3) log P value.



|        |         |   |   |   |     |      |      |      |      |         |         |          |
|--------|---------|---|---|---|-----|------|------|------|------|---------|---------|----------|
| BPAP   | t0_ABT2 | 0 | 0 | 2 | ABT | 1000 | 0,0% | 0,0% | 0,0% | 0,00016 | 0,10923 | 0,001465 |
| BPM    | t0_ABT2 | 0 | 0 | 2 | ABT | 1000 | 0,0% | 0,0% | 0,0% | 0,00016 | 0,10923 | 0,001465 |
| BPP    | t0_ABT2 | 0 | 0 | 2 | ABT | 1000 | 0,0% | 0,0% | 0,0% | 0,00016 | 0,10923 | 0,001465 |
| BPBP   | t0_ABT2 | 0 | 0 | 2 | ABT | 1000 | 0,0% | 0,0% | 0,0% | 0,00016 | 0,10923 | 0,001465 |
| BPBH   | t0_ABT2 | 0 | 0 | 2 | ABT | 1000 | 0,0% | 0,0% | 0,0% | 0,00016 | 0,10923 | 0,001465 |
| BPFL   | t0_ABT2 | 0 | 0 | 2 | ABT | 1000 | 0,0% | 0,0% | 0,0% | 0,00016 | 0,10923 | 0,001465 |
| 22BPF  | t0_ABT3 | 0 | 0 | 3 | ABT | 1000 | 0,0% | 0,0% | 0,0% | 0,00036 | 0,12933 | 0,002784 |
| BPAF   | t0_ABT3 | 0 | 0 | 3 | ABT | 1000 | 0,0% | 0,0% | 0,0% | 0,00036 | 0,12933 | 0,002784 |
| 24BPF  | t0_ABT3 | 0 | 0 | 3 | ABT | 1000 | 0,0% | 0,0% | 0,0% | 0,00036 | 0,12933 | 0,002784 |
| 44BPF  | t0_ABT3 | 0 | 0 | 3 | ABT | 1000 | 0,0% | 0,0% | 0,0% | 0,00036 | 0,12933 | 0,002784 |
| BPE    | t0_ABT3 | 0 | 0 | 3 | ABT | 1000 | 0,0% | 0,0% | 0,0% | 0,00036 | 0,12933 | 0,002784 |
| BPA    | t0_ABT3 | 0 | 0 | 3 | ABT | 1000 | 0,0% | 0,0% | 0,0% | 0,00036 | 0,12933 | 0,002784 |
| BPC    | t0_ABT3 | 0 | 0 | 3 | ABT | 1000 | 0,0% | 0,0% | 0,0% | 0,00036 | 0,12933 | 0,002784 |
| BPB    | t0_ABT3 | 0 | 0 | 3 | ABT | 1000 | 0,0% | 0,0% | 0,0% | 0,00036 | 0,12933 | 0,002784 |
| BP26DM | t0_ABT3 | 0 | 0 | 3 | ABT | 1000 | 0,0% | 0,0% | 0,0% | 0,00036 | 0,12933 | 0,002784 |
| BPC2   | t0_ABT3 | 0 | 0 | 3 | ABT | 1000 | 0,0% | 0,0% | 0,0% | 0,00036 | 0,12933 | 0,002784 |
| BPZ    | t0_ABT3 | 0 | 0 | 3 | ABT | 1000 | 0,0% | 0,0% | 0,0% | 0,00036 | 0,12933 | 0,002784 |
| BPS    | t0_ABT3 | 0 | 0 | 3 | ABT | 1000 | 0,0% | 0,0% | 0,0% | 0,00036 | 0,12933 | 0,002784 |
| BPAP   | t0_ABT3 | 0 | 0 | 3 | ABT | 1000 | 0,0% | 0,0% | 0,0% | 0,00036 | 0,12933 | 0,002784 |
| BPM    | t0_ABT3 | 0 | 0 | 3 | ABT | 1000 | 0,0% | 0,0% | 0,0% | 0,00036 | 0,12933 | 0,002784 |
| BPP    | t0_ABT3 | 0 | 0 | 3 | ABT | 1000 | 0,0% | 0,0% | 0,0% | 0,00036 | 0,12933 | 0,002784 |
| BPBP   | t0_ABT3 | 0 | 0 | 3 | ABT | 1000 | 0,0% | 0,0% | 0,0% | 0,00036 | 0,12933 | 0,002784 |
| BPPH   | t0_ABT3 | 0 | 0 | 3 | ABT | 1000 | 0,0% | 0,0% | 0,0% | 0,00036 | 0,12933 | 0,002784 |
| BPFL   | t0_ABT3 | 0 | 0 | 3 | ABT | 1000 | 0,0% | 0,0% | 0,0% | 0,00036 | 0,12933 | 0,002784 |
| 22BPF  | t0_BA1  | 0 | 0 | 1 | BA  | 1000 | 0,0% | 0,0% | 0,0% | 1,03335 | 0,24428 | 4,230187 |
| BPAF   | t0_BA1  | 0 | 0 | 1 | BA  | 1000 | 0,0% | 0,0% | 0,0% | 1,03335 | 0,24428 | 4,230187 |
| 24BPF  | t0_BA1  | 0 | 0 | 1 | BA  | 1000 | 0,0% | 0,0% | 0,0% | 1,03335 | 0,24428 | 4,230187 |
| 44BPF  | t0_BA1  | 0 | 0 | 1 | BA  | 1000 | 0,0% | 0,0% | 0,0% | 1,03335 | 0,24428 | 4,230187 |
| BPE    | t0_BA1  | 0 | 0 | 1 | BA  | 1000 | 0,0% | 0,0% | 0,0% | 1,03335 | 0,24428 | 4,230187 |
| BPA    | t0_BA1  | 0 | 0 | 1 | BA  | 1000 | 0,0% | 0,0% | 0,0% | 1,03335 | 0,24428 | 4,230187 |
| BPC    | t0_BA1  | 0 | 0 | 1 | BA  | 1000 | 0,0% | 0,0% | 0,0% | 1,03335 | 0,24428 | 4,230187 |
| BPB    | t0_BA1  | 0 | 0 | 1 | BA  | 1000 | 0,0% | 0,0% | 0,0% | 1,03335 | 0,24428 | 4,230187 |
| BP26DM | t0_BA1  | 0 | 0 | 1 | BA  | 1000 | 0,0% | 0,0% | 0,0% | 1,03335 | 0,24428 | 4,230187 |
| BPC2   | t0_BA1  | 0 | 0 | 1 | BA  | 1000 | 0,0% | 0,0% | 0,0% | 1,03335 | 0,24428 | 4,230187 |
| BPZ    | t0_BA1  | 0 | 0 | 1 | BA  | 1000 | 0,0% | 0,0% | 0,0% | 1,03335 | 0,24428 | 4,230187 |
| BPS    | t0_BA1  | 0 | 0 | 1 | BA  | 1000 | 0,0% | 0,0% | 0,0% | 1,03335 | 0,24428 | 4,230187 |
| BPAP   | t0_BA1  | 0 | 0 | 1 | BA  | 1000 | 0,0% | 0,0% | 0,0% | 1,03335 | 0,24428 | 4,230187 |
| BPM    | t0_BA1  | 0 | 0 | 1 | BA  | 1000 | 0,0% | 0,0% | 0,0% | 1,03335 | 0,24428 | 4,230187 |
| BPP    | t0_BA1  | 0 | 0 | 1 | BA  | 1000 | 0,0% | 0,0% | 0,0% | 1,03335 | 0,24428 | 4,230187 |
| BPBP   | t0_BA1  | 0 | 0 | 1 | BA  | 1000 | 0,0% | 0,0% | 0,0% | 1,03335 | 0,24428 | 4,230187 |
| BPPH   | t0_BA1  | 0 | 0 | 1 | BA  | 1000 | 0,0% | 0,0% | 0,0% | 1,03335 | 0,24428 | 4,230187 |
| BPFL   | t0_BA1  | 0 | 0 | 1 | BA  | 1000 | 0,0% | 0,0% | 0,0% | 1,03335 | 0,24428 | 4,230187 |
| 22BPF  | t0_BA2  | 0 | 0 | 2 | BA  | 1000 | 0,0% | 0,0% | 0,0% | 1,03418 | 0,22503 | 4,595743 |
| BPAF   | t0_BA2  | 0 | 0 | 2 | BA  | 1000 | 0,0% | 0,0% | 0,0% | 1,03418 | 0,22503 | 4,595743 |
| 24BPF  | t0_BA2  | 0 | 0 | 2 | BA  | 1000 | 0,0% | 0,0% | 0,0% | 1,03418 | 0,22503 | 4,595743 |
| 44BPF  | t0_BA2  | 0 | 0 | 2 | BA  | 1000 | 0,0% | 0,0% | 0,0% | 1,03418 | 0,22503 | 4,595743 |
| BPE    | t0_BA2  | 0 | 0 | 2 | BA  | 1000 | 0,0% | 0,0% | 0,0% | 1,03418 | 0,22503 | 4,595743 |
| BPA    | t0_BA2  | 0 | 0 | 2 | BA  | 1000 | 0,0% | 0,0% | 0,0% | 1,03418 | 0,22503 | 4,595743 |
| BPC    | t0_BA2  | 0 | 0 | 2 | BA  | 1000 | 0,0% | 0,0% | 0,0% | 1,03418 | 0,22503 | 4,595743 |
| BPB    | t0_BA2  | 0 | 0 | 2 | BA  | 1000 | 0,0% | 0,0% | 0,0% | 1,03418 | 0,22503 | 4,595743 |
| BP26DM | t0_BA2  | 0 | 0 | 2 | BA  | 1000 | 0,0% | 0,0% | 0,0% | 1,03418 | 0,22503 | 4,595743 |
| BPC2   | t0_BA2  | 0 | 0 | 2 | BA  | 1000 | 0,0% | 0,0% | 0,0% | 1,03418 | 0,22503 | 4,595743 |
| BPZ    | t0_BA2  | 0 | 0 | 2 | BA  | 1000 | 0,0% | 0,0% | 0,0% | 1,03418 | 0,22503 | 4,595743 |
| BPS    | t0_BA2  | 0 | 0 | 2 | BA  | 1000 | 0,0% | 0,0% | 0,0% | 1,03418 | 0,22503 | 4,595743 |
| BPAP   | t0_BA2  | 0 | 0 | 2 | BA  | 1000 | 0,0% | 0,0% | 0,0% | 1,03418 | 0,22503 | 4,595743 |
| BPM    | t0_BA2  | 0 | 0 | 2 | BA  | 1000 | 0,0% | 0,0% | 0,0% | 1,03418 | 0,22503 | 4,595743 |
| BPP    | t0_BA2  | 0 | 0 | 2 | BA  | 1000 | 0,0% | 0,0% | 0,0% | 1,03418 | 0,22503 | 4,595743 |
| BPBP   | t0_BA2  | 0 | 0 | 2 | BA  | 1000 | 0,0% | 0,0% | 0,0% | 1,03418 | 0,22503 | 4,595743 |
| BPPH   | t0_BA2  | 0 | 0 | 2 | BA  | 1000 | 0,0% | 0,0% | 0,0% | 1,03418 | 0,22503 | 4,595743 |
| BPFL   | t0_BA2  | 0 | 0 | 2 | BA  | 1000 | 0,0% | 0,0% | 0,0% | 1,03418 | 0,22503 | 4,595743 |
| 22BPF  | t0_BA3  | 0 | 0 | 3 | BA  | 1000 | 0,0% | 0,0% | 0,0% | 1,0353  | 0,20894 | 4,955011 |
| BPAF   | t0_BA3  | 0 | 0 | 3 | BA  | 1000 | 0,0% | 0,0% | 0,0% | 1,0353  | 0,20894 | 4,955011 |
| 24BPF  | t0_BA3  | 0 | 0 | 3 | BA  | 1000 | 0,0% | 0,0% | 0,0% | 1,0353  | 0,20894 | 4,955011 |
| 44BPF  | t0_BA3  | 0 | 0 | 3 | BA  | 1000 | 0,0% | 0,0% | 0,0% | 1,0353  | 0,20894 | 4,955011 |
| BPE    | t0_BA3  | 0 | 0 | 3 | BA  | 1000 | 0,0% | 0,0% | 0,0% | 1,0353  | 0,20894 | 4,955011 |
| BPA    | t0_BA3  | 0 | 0 | 3 | BA  | 1000 | 0,0% | 0,0% | 0,0% | 1,0353  | 0,20894 | 4,955011 |
| BPC    | t0_BA3  | 0 | 0 | 3 | BA  | 1000 | 0,0% | 0,0% | 0,0% | 1,0353  | 0,20894 | 4,955011 |
| BPB    | t0_BA3  | 0 | 0 | 3 | BA  | 1000 | 0,0% | 0,0% | 0,0% | 1,0353  | 0,20894 | 4,955011 |
| BP26DM | t0_BA3  | 0 | 0 | 3 | BA  | 1000 | 0,0% | 0,0% | 0,0% | 1,0353  | 0,20894 | 4,955011 |
| BPC2   | t0_BA3  | 0 | 0 | 3 | BA  | 1000 | 0,0% | 0,0% | 0,0% | 1,0353  | 0,20894 | 4,955011 |
| BPZ    | t0_BA3  | 0 | 0 | 3 | BA  | 1000 | 0,0% | 0,0% | 0,0% | 1,0353  | 0,20894 | 4,955011 |
| BPS    | t0_BA3  | 0 | 0 | 3 | BA  | 1000 | 0,0% | 0,0% | 0,0% | 1,0353  | 0,20894 | 4,955011 |
| BPAP   | t0_BA3  | 0 | 0 | 3 | BA  | 1000 | 0,0% | 0,0% | 0,0% | 1,0353  | 0,20894 | 4,955011 |
| BPM    | t0_BA3  | 0 | 0 | 3 | BA  | 1000 | 0,0% | 0,0% | 0,0% | 1,0353  | 0,20894 | 4,955011 |
| BPP    | t0_BA3  | 0 | 0 | 3 | BA  | 1000 | 0,0% | 0,0% | 0,0% | 1,0353  | 0,20894 | 4,955011 |
| BPBP   | t0_BA3  | 0 | 0 | 3 | BA  | 1000 | 0,0% | 0,0% | 0,0% | 1,0353  | 0,20894 | 4,955011 |
| BPPH   | t0_BA3  | 0 | 0 | 3 | BA  | 1000 | 0,0% | 0,0% | 0,0% | 1,0353  | 0,20894 | 4,955011 |
| BPFL   | t0_BA3  | 0 | 0 | 3 | BA  | 1000 | 0,0% | 0,0% | 0,0% | 1,0353  | 0,20894 | 4,955011 |
| 22BPF  | t0_BB1  | 0 | 0 | 1 | BB  | 1000 | 0,0% | 0,0% | 0,0% | 0       | 0,43612 | 0        |
| BPAF   | t0_BB1  | 0 | 0 | 1 | BB  | 1000 | 0,0% | 0,0% | 0,0% | 0       | 0,43612 | 0        |
| 24BPF  | t0_BB1  | 0 | 0 | 1 | BB  | 1000 | 0,0% | 0,0% | 0,0% | 0       | 0,43612 | 0        |
| 44BPF  | t0_BB1  | 0 | 0 | 1 | BB  | 1000 | 0,0% | 0,0% | 0,0% | 0       | 0,43612 | 0        |
| BPE    | t0_BB1  | 0 | 0 | 1 | BB  | 1000 | 0,0% | 0,0% | 0,0% | 0       | 0,43612 | 0        |
| BPA    | t0_BB1  | 0 | 0 | 1 | BB  | 1000 | 0,0% | 0,0% | 0,0% | 0       | 0,43612 | 0        |
| BPC    | t0_BB1  | 0 | 0 | 1 | BB  | 1000 | 0,0% | 0,0% | 0,0% | 0       | 0,43612 | 0        |
| BPB    | t0_BB1  | 0 | 0 | 1 | BB  | 1000 | 0,0% | 0,0% | 0,0% | 0       | 0,43612 | 0        |

|        |        |   |     |    |      |      |      |      |         |         |          |
|--------|--------|---|-----|----|------|------|------|------|---------|---------|----------|
| BP26DM | t0_BB1 | 0 | 0 1 | BB | 1000 | 0,0% | 0,0% | 0,0% | 0       | 0,43612 | 0        |
| BPC2   | t0_BB1 | 0 | 0 1 | BB | 1000 | 0,0% | 0,0% | 0,0% | 0       | 0,43612 | 0        |
| BPZ    | t0_BB1 | 0 | 0 1 | BB | 1000 | 0,0% | 0,0% | 0,0% | 0       | 0,43612 | 0        |
| BPS    | t0_BB1 | 0 | 0 1 | BB | 1000 | 0,0% | 0,0% | 0,0% | 0       | 0,43612 | 0        |
| BPAP   | t0_BB1 | 0 | 0 1 | BB | 1000 | 0,0% | 0,0% | 0,0% | 0       | 0,43612 | 0        |
| BPM    | t0_BB1 | 0 | 0 1 | BB | 1000 | 0,0% | 0,0% | 0,0% | 0       | 0,43612 | 0        |
| BPP    | t0_BB1 | 0 | 0 1 | BB | 1000 | 0,0% | 0,0% | 0,0% | 0       | 0,43612 | 0        |
| BPBP   | t0_BB1 | 0 | 0 1 | BB | 1000 | 0,0% | 0,0% | 0,0% | 0       | 0,43612 | 0        |
| BPPH   | t0_BB1 | 0 | 0 1 | BB | 1000 | 0,0% | 0,0% | 0,0% | 0       | 0,43612 | 0        |
| BPFL   | t0_BB1 | 0 | 0 1 | BB | 1000 | 0,0% | 0,0% | 0,0% | 0       | 0,43612 | 0        |
| 22BPF  | t0_BB2 | 0 | 0 2 | BB | 1000 | 0,0% | 0,0% | 0,0% | 0,0002  | 0,28913 | 0,000692 |
| BPAF   | t0_BB2 | 0 | 0 2 | BB | 1000 | 0,0% | 0,0% | 0,0% | 0,0002  | 0,28913 | 0,000692 |
| 24BPF  | t0_BB2 | 0 | 0 2 | BB | 1000 | 0,0% | 0,0% | 0,0% | 0,0002  | 0,28913 | 0,000692 |
| 44BPF  | t0_BB2 | 0 | 0 2 | BB | 1000 | 0,0% | 0,0% | 0,0% | 0,0002  | 0,28913 | 0,000692 |
| BPE    | t0_BB2 | 0 | 0 2 | BB | 1000 | 0,0% | 0,0% | 0,0% | 0,0002  | 0,28913 | 0,000692 |
| BPA    | t0_BB2 | 0 | 0 2 | BB | 1000 | 0,0% | 0,0% | 0,0% | 0,0002  | 0,28913 | 0,000692 |
| BPC    | t0_BB2 | 0 | 0 2 | BB | 1000 | 0,0% | 0,0% | 0,0% | 0,0002  | 0,28913 | 0,000692 |
| BPB    | t0_BB2 | 0 | 0 2 | BB | 1000 | 0,0% | 0,0% | 0,0% | 0,0002  | 0,28913 | 0,000692 |
| BP26DM | t0_BB2 | 0 | 0 2 | BB | 1000 | 0,0% | 0,0% | 0,0% | 0,0002  | 0,28913 | 0,000692 |
| BPC2   | t0_BB2 | 0 | 0 2 | BB | 1000 | 0,0% | 0,0% | 0,0% | 0,0002  | 0,28913 | 0,000692 |
| BPZ    | t0_BB2 | 0 | 0 2 | BB | 1000 | 0,0% | 0,0% | 0,0% | 0,0002  | 0,28913 | 0,000692 |
| BPS    | t0_BB2 | 0 | 0 2 | BB | 1000 | 0,0% | 0,0% | 0,0% | 0,0002  | 0,28913 | 0,000692 |
| BPAP   | t0_BB2 | 0 | 0 2 | BB | 1000 | 0,0% | 0,0% | 0,0% | 0,0002  | 0,28913 | 0,000692 |
| BPM    | t0_BB2 | 0 | 0 2 | BB | 1000 | 0,0% | 0,0% | 0,0% | 0,0002  | 0,28913 | 0,000692 |
| BPP    | t0_BB2 | 0 | 0 2 | BB | 1000 | 0,0% | 0,0% | 0,0% | 0,0002  | 0,28913 | 0,000692 |
| BPBP   | t0_BB2 | 0 | 0 2 | BB | 1000 | 0,0% | 0,0% | 0,0% | 0,0002  | 0,28913 | 0,000692 |
| BPPH   | t0_BB2 | 0 | 0 2 | BB | 1000 | 0,0% | 0,0% | 0,0% | 0,0002  | 0,28913 | 0,000692 |
| BPFL   | t0_BB2 | 0 | 0 2 | BB | 1000 | 0,0% | 0,0% | 0,0% | 0,0002  | 0,28913 | 0,000692 |
| 22BPF  | t0_BB3 | 0 | 0 3 | BB | 1000 | 0,0% | 0,0% | 0,0% | 0,00008 | 0,24136 | 0,000331 |
| BPAF   | t0_BB3 | 0 | 0 3 | BB | 1000 | 0,0% | 0,0% | 0,0% | 0,00008 | 0,24136 | 0,000331 |
| 24BPF  | t0_BB3 | 0 | 0 3 | BB | 1000 | 0,0% | 0,0% | 0,0% | 0,00008 | 0,24136 | 0,000331 |
| 44BPF  | t0_BB3 | 0 | 0 3 | BB | 1000 | 0,0% | 0,0% | 0,0% | 0,00008 | 0,24136 | 0,000331 |
| BPE    | t0_BB3 | 0 | 0 3 | BB | 1000 | 0,0% | 0,0% | 0,0% | 0,00008 | 0,24136 | 0,000331 |
| BPA    | t0_BB3 | 0 | 0 3 | BB | 1000 | 0,0% | 0,0% | 0,0% | 0,00008 | 0,24136 | 0,000331 |
| BPC    | t0_BB3 | 0 | 0 3 | BB | 1000 | 0,0% | 0,0% | 0,0% | 0,00008 | 0,24136 | 0,000331 |
| BPB    | t0_BB3 | 0 | 0 3 | BB | 1000 | 0,0% | 0,0% | 0,0% | 0,00008 | 0,24136 | 0,000331 |
| BP26DM | t0_BB3 | 0 | 0 3 | BB | 1000 | 0,0% | 0,0% | 0,0% | 0,00008 | 0,24136 | 0,000331 |
| BPC2   | t0_BB3 | 0 | 0 3 | BB | 1000 | 0,0% | 0,0% | 0,0% | 0,00008 | 0,24136 | 0,000331 |
| BPZ    | t0_BB3 | 0 | 0 3 | BB | 1000 | 0,0% | 0,0% | 0,0% | 0,00008 | 0,24136 | 0,000331 |
| BPS    | t0_BB3 | 0 | 0 3 | BB | 1000 | 0,0% | 0,0% | 0,0% | 0,00008 | 0,24136 | 0,000331 |
| BPAP   | t0_BB3 | 0 | 0 3 | BB | 1000 | 0,0% | 0,0% | 0,0% | 0,00008 | 0,24136 | 0,000331 |
| BPM    | t0_BB3 | 0 | 0 3 | BB | 1000 | 0,0% | 0,0% | 0,0% | 0,00008 | 0,24136 | 0,000331 |
| BPP    | t0_BB3 | 0 | 0 3 | BB | 1000 | 0,0% | 0,0% | 0,0% | 0,00008 | 0,24136 | 0,000331 |
| BPBP   | t0_BB3 | 0 | 0 3 | BB | 1000 | 0,0% | 0,0% | 0,0% | 0,00008 | 0,24136 | 0,000331 |
| BPPH   | t0_BB3 | 0 | 0 3 | BB | 1000 | 0,0% | 0,0% | 0,0% | 0,00008 | 0,24136 | 0,000331 |
| BPFL   | t0_BB3 | 0 | 0 3 | BB | 1000 | 0,0% | 0,0% | 0,0% | 0,00008 | 0,24136 | 0,000331 |
| 22BPF  | t0_BK1 | 0 | 0 1 | BK | 1000 | 0,0% | 0,0% | 0,0% | 0,98451 | 0,31888 | 3,0874   |
| BPAF   | t0_BK1 | 0 | 0 1 | BK | 1000 | 0,0% | 0,0% | 0,0% | 0,98451 | 0,31888 | 3,0874   |
| 24BPF  | t0_BK1 | 0 | 0 1 | BK | 1000 | 0,0% | 0,0% | 0,0% | 0,98451 | 0,31888 | 3,0874   |
| 44BPF  | t0_BK1 | 0 | 0 1 | BK | 1000 | 0,0% | 0,0% | 0,0% | 0,98451 | 0,31888 | 3,0874   |
| BPE    | t0_BK1 | 0 | 0 1 | BK | 1000 | 0,0% | 0,0% | 0,0% | 0,98451 | 0,31888 | 3,0874   |
| BPA    | t0_BK1 | 0 | 0 1 | BK | 1000 | 0,0% | 0,0% | 0,0% | 0,98451 | 0,31888 | 3,0874   |
| BPC    | t0_BK1 | 0 | 0 1 | BK | 1000 | 0,0% | 0,0% | 0,0% | 0,98451 | 0,31888 | 3,0874   |
| BPB    | t0_BK1 | 0 | 0 1 | BK | 1000 | 0,0% | 0,0% | 0,0% | 0,98451 | 0,31888 | 3,0874   |
| BP26DM | t0_BK1 | 0 | 0 1 | BK | 1000 | 0,0% | 0,0% | 0,0% | 0,98451 | 0,31888 | 3,0874   |
| BPC2   | t0_BK1 | 0 | 0 1 | BK | 1000 | 0,0% | 0,0% | 0,0% | 0,98451 | 0,31888 | 3,0874   |
| BPZ    | t0_BK1 | 0 | 0 1 | BK | 1000 | 0,0% | 0,0% | 0,0% | 0,98451 | 0,31888 | 3,0874   |
| BPS    | t0_BK1 | 0 | 0 1 | BK | 1000 | 0,0% | 0,0% | 0,0% | 0,98451 | 0,31888 | 3,0874   |
| BPAP   | t0_BK1 | 0 | 0 1 | BK | 1000 | 0,0% | 0,0% | 0,0% | 0,98451 | 0,31888 | 3,0874   |
| BPM    | t0_BK1 | 0 | 0 1 | BK | 1000 | 0,0% | 0,0% | 0,0% | 0,98451 | 0,31888 | 3,0874   |
| BPP    | t0_BK1 | 0 | 0 1 | BK | 1000 | 0,0% | 0,0% | 0,0% | 0,98451 | 0,31888 | 3,0874   |
| BPBP   | t0_BK1 | 0 | 0 1 | BK | 1000 | 0,0% | 0,0% | 0,0% | 0,98451 | 0,31888 | 3,0874   |
| BPPH   | t0_BK1 | 0 | 0 1 | BK | 1000 | 0,0% | 0,0% | 0,0% | 0,98451 | 0,31888 | 3,0874   |
| BPFL   | t0_BK1 | 0 | 0 1 | BK | 1000 | 0,0% | 0,0% | 0,0% | 0,98451 | 0,31888 | 3,0874   |
| 22BPF  | t0_BK2 | 0 | 0 2 | BK | 1000 | 0,0% | 0,0% | 0,0% | 0,97788 | 0,44535 | 2,195756 |
| BPAF   | t0_BK2 | 0 | 0 2 | BK | 1000 | 0,0% | 0,0% | 0,0% | 0,97788 | 0,44535 | 2,195756 |
| 24BPF  | t0_BK2 | 0 | 0 2 | BK | 1000 | 0,0% | 0,0% | 0,0% | 0,97788 | 0,44535 | 2,195756 |
| 44BPF  | t0_BK2 | 0 | 0 2 | BK | 1000 | 0,0% | 0,0% | 0,0% | 0,97788 | 0,44535 | 2,195756 |
| BPE    | t0_BK2 | 0 | 0 2 | BK | 1000 | 0,0% | 0,0% | 0,0% | 0,97788 | 0,44535 | 2,195756 |
| BPA    | t0_BK2 | 0 | 0 2 | BK | 1000 | 0,0% | 0,0% | 0,0% | 0,97788 | 0,44535 | 2,195756 |
| BPC    | t0_BK2 | 0 | 0 2 | BK | 1000 | 0,0% | 0,0% | 0,0% | 0,97788 | 0,44535 | 2,195756 |
| BPB    | t0_BK2 | 0 | 0 2 | BK | 1000 | 0,0% | 0,0% | 0,0% | 0,97788 | 0,44535 | 2,195756 |
| BP26DM | t0_BK2 | 0 | 0 2 | BK | 1000 | 0,0% | 0,0% | 0,0% | 0,97788 | 0,44535 | 2,195756 |
| BPC2   | t0_BK2 | 0 | 0 2 | BK | 1000 | 0,0% | 0,0% | 0,0% | 0,97788 | 0,44535 | 2,195756 |
| BPZ    | t0_BK2 | 0 | 0 2 | BK | 1000 | 0,0% | 0,0% | 0,0% | 0,97788 | 0,44535 | 2,195756 |
| BPS    | t0_BK2 | 0 | 0 2 | BK | 1000 | 0,0% | 0,0% | 0,0% | 0,97788 | 0,44535 | 2,195756 |
| BPAP   | t0_BK2 | 0 | 0 2 | BK | 1000 | 0,0% | 0,0% | 0,0% | 0,97788 | 0,44535 | 2,195756 |
| BPM    | t0_BK2 | 0 | 0 2 | BK | 1000 | 0,0% | 0,0% | 0,0% | 0,97788 | 0,44535 | 2,195756 |
| BPP    | t0_BK2 | 0 | 0 2 | BK | 1000 | 0,0% | 0,0% | 0,0% | 0,97788 | 0,44535 | 2,195756 |
| BPBP   | t0_BK2 | 0 | 0 2 | BK | 1000 | 0,0% | 0,0% | 0,0% | 0,97788 | 0,44535 | 2,195756 |
| BPPH   | t0_BK2 | 0 | 0 2 | BK | 1000 | 0,0% | 0,0% | 0,0% | 0,97788 | 0,44535 | 2,195756 |
| BPFL   | t0_BK2 | 0 | 0 2 | BK | 1000 | 0,0% | 0,0% | 0,0% | 0,97788 | 0,44535 | 2,195756 |
| 22BPF  | t0_BK3 | 0 | 0 3 | BK | 1000 | 0,0% | 0,0% | 0,0% | 0,95136 | 0,47011 | 2,023697 |
| BPAF   | t0_BK3 | 0 | 0 3 | BK | 1000 | 0,0% | 0,0% | 0,0% | 0,95136 | 0,47011 | 2,023697 |
| 24BPF  | t0_BK3 | 0 | 0 3 | BK | 1000 | 0,0% | 0,0% | 0,0% | 0,95136 | 0,47011 | 2,023697 |
| 44BPF  | t0_BK3 | 0 | 0 3 | BK | 1000 | 0,0% | 0,0% | 0,0% | 0,95136 | 0,47011 | 2,023697 |

|        |        |   |   |   |    |      |      |      |      |         |         |          |
|--------|--------|---|---|---|----|------|------|------|------|---------|---------|----------|
| BPE    | t0_BK3 | 0 | 0 | 3 | BK | 1000 | 0,0% | 0,0% | 0,0% | 0,95136 | 0,47011 | 2,023697 |
| BPA    | t0_BK3 | 0 | 0 | 3 | BK | 1000 | 0,0% | 0,0% | 0,0% | 0,95136 | 0,47011 | 2,023697 |
| BPC    | t0_BK3 | 0 | 0 | 3 | BK | 1000 | 0,0% | 0,0% | 0,0% | 0,95136 | 0,47011 | 2,023697 |
| BPB    | t0_BK3 | 0 | 0 | 3 | BK | 1000 | 0,0% | 0,0% | 0,0% | 0,95136 | 0,47011 | 2,023697 |
| BP26DM | t0_BK3 | 0 | 0 | 3 | BK | 1000 | 0,0% | 0,0% | 0,0% | 0,95136 | 0,47011 | 2,023697 |
| BPC2   | t0_BK3 | 0 | 0 | 3 | BK | 1000 | 0,0% | 0,0% | 0,0% | 0,95136 | 0,47011 | 2,023697 |
| BPZ    | t0_BK3 | 0 | 0 | 3 | BK | 1000 | 0,0% | 0,0% | 0,0% | 0,95136 | 0,47011 | 2,023697 |
| BPS    | t0_BK3 | 0 | 0 | 3 | BK | 1000 | 0,0% | 0,0% | 0,0% | 0,95136 | 0,47011 | 2,023697 |
| BPAP   | t0_BK3 | 0 | 0 | 3 | BK | 1000 | 0,0% | 0,0% | 0,0% | 0,95136 | 0,47011 | 2,023697 |
| BPM    | t0_BK3 | 0 | 0 | 3 | BK | 1000 | 0,0% | 0,0% | 0,0% | 0,95136 | 0,47011 | 2,023697 |
| BPP    | t0_BK3 | 0 | 0 | 3 | BK | 1000 | 0,0% | 0,0% | 0,0% | 0,95136 | 0,47011 | 2,023697 |
| BPBP   | t0_BK3 | 0 | 0 | 3 | BK | 1000 | 0,0% | 0,0% | 0,0% | 0,95136 | 0,47011 | 2,023697 |
| BPPH   | t0_BK3 | 0 | 0 | 3 | BK | 1000 | 0,0% | 0,0% | 0,0% | 0,95136 | 0,47011 | 2,023697 |
| BPFL   | t0_BK3 | 0 | 0 | 3 | BK | 1000 | 0,0% | 0,0% | 0,0% | 0,95136 | 0,47011 | 2,023697 |
| 22BPF  | t0_EA1 | 0 | 0 | 1 | EA | 1000 | 0,0% | 0,0% | 0,0% | 1,00751 | 0,16217 | 6,212678 |
| BPAF   | t0_EA1 | 0 | 0 | 1 | EA | 1000 | 0,0% | 0,0% | 0,0% | 1,00751 | 0,16217 | 6,212678 |
| 24BPF  | t0_EA1 | 0 | 0 | 1 | EA | 1000 | 0,0% | 0,0% | 0,0% | 1,00751 | 0,16217 | 6,212678 |
| 44BPF  | t0_EA1 | 0 | 0 | 1 | EA | 1000 | 0,0% | 0,0% | 0,0% | 1,00751 | 0,16217 | 6,212678 |
| BPE    | t0_EA1 | 0 | 0 | 1 | EA | 1000 | 0,0% | 0,0% | 0,0% | 1,00751 | 0,16217 | 6,212678 |
| BPA    | t0_EA1 | 0 | 0 | 1 | EA | 1000 | 0,0% | 0,0% | 0,0% | 1,00751 | 0,16217 | 6,212678 |
| BPC    | t0_EA1 | 0 | 0 | 1 | EA | 1000 | 0,0% | 0,0% | 0,0% | 1,00751 | 0,16217 | 6,212678 |
| BPB    | t0_EA1 | 0 | 0 | 1 | EA | 1000 | 0,0% | 0,0% | 0,0% | 1,00751 | 0,16217 | 6,212678 |
| BP26DM | t0_EA1 | 0 | 0 | 1 | EA | 1000 | 0,0% | 0,0% | 0,0% | 1,00751 | 0,16217 | 6,212678 |
| BPC2   | t0_EA1 | 0 | 0 | 1 | EA | 1000 | 0,0% | 0,0% | 0,0% | 1,00751 | 0,16217 | 6,212678 |
| BPZ    | t0_EA1 | 0 | 0 | 1 | EA | 1000 | 0,0% | 0,0% | 0,0% | 1,00751 | 0,16217 | 6,212678 |
| BPS    | t0_EA1 | 0 | 0 | 1 | EA | 1000 | 0,0% | 0,0% | 0,0% | 1,00751 | 0,16217 | 6,212678 |
| BPAP   | t0_EA1 | 0 | 0 | 1 | EA | 1000 | 0,0% | 0,0% | 0,0% | 1,00751 | 0,16217 | 6,212678 |
| BPM    | t0_EA1 | 0 | 0 | 1 | EA | 1000 | 0,0% | 0,0% | 0,0% | 1,00751 | 0,16217 | 6,212678 |
| BPP    | t0_EA1 | 0 | 0 | 1 | EA | 1000 | 0,0% | 0,0% | 0,0% | 1,00751 | 0,16217 | 6,212678 |
| BPBP   | t0_EA1 | 0 | 0 | 1 | EA | 1000 | 0,0% | 0,0% | 0,0% | 1,00751 | 0,16217 | 6,212678 |
| BPPH   | t0_EA1 | 0 | 0 | 1 | EA | 1000 | 0,0% | 0,0% | 0,0% | 1,00751 | 0,16217 | 6,212678 |
| BPFL   | t0_EA1 | 0 | 0 | 1 | EA | 1000 | 0,0% | 0,0% | 0,0% | 1,00751 | 0,16217 | 6,212678 |
| 22BPF  | t0_EA2 | 0 | 0 | 2 | EA | 1000 | 0,0% | 0,0% | 0,0% | 1,02196 | 0,29124 | 3,508996 |
| BPAF   | t0_EA2 | 0 | 0 | 2 | EA | 1000 | 0,0% | 0,0% | 0,0% | 1,02196 | 0,29124 | 3,508996 |
| 24BPF  | t0_EA2 | 0 | 0 | 2 | EA | 1000 | 0,0% | 0,0% | 0,0% | 1,02196 | 0,29124 | 3,508996 |
| 44BPF  | t0_EA2 | 0 | 0 | 2 | EA | 1000 | 0,0% | 0,0% | 0,0% | 1,02196 | 0,29124 | 3,508996 |
| BPE    | t0_EA2 | 0 | 0 | 2 | EA | 1000 | 0,0% | 0,0% | 0,0% | 1,02196 | 0,29124 | 3,508996 |
| BPA    | t0_EA2 | 0 | 0 | 2 | EA | 1000 | 0,0% | 0,0% | 0,0% | 1,02196 | 0,29124 | 3,508996 |
| BPC    | t0_EA2 | 0 | 0 | 2 | EA | 1000 | 0,0% | 0,0% | 0,0% | 1,02196 | 0,29124 | 3,508996 |
| BPB    | t0_EA2 | 0 | 0 | 2 | EA | 1000 | 0,0% | 0,0% | 0,0% | 1,02196 | 0,29124 | 3,508996 |
| BP26DM | t0_EA2 | 0 | 0 | 2 | EA | 1000 | 0,0% | 0,0% | 0,0% | 1,02196 | 0,29124 | 3,508996 |
| BPC2   | t0_EA2 | 0 | 0 | 2 | EA | 1000 | 0,0% | 0,0% | 0,0% | 1,02196 | 0,29124 | 3,508996 |
| BPZ    | t0_EA2 | 0 | 0 | 2 | EA | 1000 | 0,0% | 0,0% | 0,0% | 1,02196 | 0,29124 | 3,508996 |
| BPS    | t0_EA2 | 0 | 0 | 2 | EA | 1000 | 0,0% | 0,0% | 0,0% | 1,02196 | 0,29124 | 3,508996 |
| BPAP   | t0_EA2 | 0 | 0 | 2 | EA | 1000 | 0,0% | 0,0% | 0,0% | 1,02196 | 0,29124 | 3,508996 |
| BPM    | t0_EA2 | 0 | 0 | 2 | EA | 1000 | 0,0% | 0,0% | 0,0% | 1,02196 | 0,29124 | 3,508996 |
| BPP    | t0_EA2 | 0 | 0 | 2 | EA | 1000 | 0,0% | 0,0% | 0,0% | 1,02196 | 0,29124 | 3,508996 |
| BPBP   | t0_EA2 | 0 | 0 | 2 | EA | 1000 | 0,0% | 0,0% | 0,0% | 1,02196 | 0,29124 | 3,508996 |
| BPPH   | t0_EA2 | 0 | 0 | 2 | EA | 1000 | 0,0% | 0,0% | 0,0% | 1,02196 | 0,29124 | 3,508996 |
| BPFL   | t0_EA2 | 0 | 0 | 2 | EA | 1000 | 0,0% | 0,0% | 0,0% | 1,02196 | 0,29124 | 3,508996 |
| 22BPF  | t0_EA3 | 0 | 0 | 3 | EA | 1000 | 0,0% | 0,0% | 0,0% | 1,02851 | 0,20103 | 5,116202 |
| BPAF   | t0_EA3 | 0 | 0 | 3 | EA | 1000 | 0,0% | 0,0% | 0,0% | 1,02851 | 0,20103 | 5,116202 |
| 24BPF  | t0_EA3 | 0 | 0 | 3 | EA | 1000 | 0,0% | 0,0% | 0,0% | 1,02851 | 0,20103 | 5,116202 |
| 44BPF  | t0_EA3 | 0 | 0 | 3 | EA | 1000 | 0,0% | 0,0% | 0,0% | 1,02851 | 0,20103 | 5,116202 |
| BPE    | t0_EA3 | 0 | 0 | 3 | EA | 1000 | 0,0% | 0,0% | 0,0% | 1,02851 | 0,20103 | 5,116202 |
| BPA    | t0_EA3 | 0 | 0 | 3 | EA | 1000 | 0,0% | 0,0% | 0,0% | 1,02851 | 0,20103 | 5,116202 |
| BPC    | t0_EA3 | 0 | 0 | 3 | EA | 1000 | 0,0% | 0,0% | 0,0% | 1,02851 | 0,20103 | 5,116202 |
| BPB    | t0_EA3 | 0 | 0 | 3 | EA | 1000 | 0,0% | 0,0% | 0,0% | 1,02851 | 0,20103 | 5,116202 |
| BP26DM | t0_EA3 | 0 | 0 | 3 | EA | 1000 | 0,0% | 0,0% | 0,0% | 1,02851 | 0,20103 | 5,116202 |
| BPC2   | t0_EA3 | 0 | 0 | 3 | EA | 1000 | 0,0% | 0,0% | 0,0% | 1,02851 | 0,20103 | 5,116202 |
| BPZ    | t0_EA3 | 0 | 0 | 3 | EA | 1000 | 0,0% | 0,0% | 0,0% | 1,02851 | 0,20103 | 5,116202 |
| BPS    | t0_EA3 | 0 | 0 | 3 | EA | 1000 | 0,0% | 0,0% | 0,0% | 1,02851 | 0,20103 | 5,116202 |
| BPAP   | t0_EA3 | 0 | 0 | 3 | EA | 1000 | 0,0% | 0,0% | 0,0% | 1,02851 | 0,20103 | 5,116202 |
| BPM    | t0_EA3 | 0 | 0 | 3 | EA | 1000 | 0,0% | 0,0% | 0,0% | 1,02851 | 0,20103 | 5,116202 |
| BPP    | t0_EA3 | 0 | 0 | 3 | EA | 1000 | 0,0% | 0,0% | 0,0% | 1,02851 | 0,20103 | 5,116202 |
| BPBP   | t0_EA3 | 0 | 0 | 3 | EA | 1000 | 0,0% | 0,0% | 0,0% | 1,02851 | 0,20103 | 5,116202 |
| BPPH   | t0_EA3 | 0 | 0 | 3 | EA | 1000 | 0,0% | 0,0% | 0,0% | 1,02851 | 0,20103 | 5,116202 |
| BPFL   | t0_EA3 | 0 | 0 | 3 | EA | 1000 | 0,0% | 0,0% | 0,0% | 1,02851 | 0,20103 | 5,116202 |
| 22BPF  | t0_EB1 | 0 | 0 | 1 | EB | 1000 | 0,0% | 0,0% | 0,0% | 0,00016 | 0,66419 | 0,000241 |
| BPAF   | t0_EB1 | 0 | 0 | 1 | EB | 1000 | 0,0% | 0,0% | 0,0% | 0,00016 | 0,66419 | 0,000241 |
| 24BPF  | t0_EB1 | 0 | 0 | 1 | EB | 1000 | 0,0% | 0,0% | 0,0% | 0,00016 | 0,66419 | 0,000241 |
| 44BPF  | t0_EB1 | 0 | 0 | 1 | EB | 1000 | 0,0% | 0,0% | 0,0% | 0,00016 | 0,66419 | 0,000241 |
| BPE    | t0_EB1 | 0 | 0 | 1 | EB | 1000 | 0,0% | 0,0% | 0,0% | 0,00016 | 0,66419 | 0,000241 |
| BPA    | t0_EB1 | 0 | 0 | 1 | EB | 1000 | 0,0% | 0,0% | 0,0% | 0,00016 | 0,66419 | 0,000241 |
| BPC    | t0_EB1 | 0 | 0 | 1 | EB | 1000 | 0,0% | 0,0% | 0,0% | 0,00016 | 0,66419 | 0,000241 |
| BPB    | t0_EB1 | 0 | 0 | 1 | EB | 1000 | 0,0% | 0,0% | 0,0% | 0,00016 | 0,66419 | 0,000241 |
| BP26DM | t0_EB1 | 0 | 0 | 1 | EB | 1000 | 0,0% | 0,0% | 0,0% | 0,00016 | 0,66419 | 0,000241 |
| BPC2   | t0_EB1 | 0 | 0 | 1 | EB | 1000 | 0,0% | 0,0% | 0,0% | 0,00016 | 0,66419 | 0,000241 |
| BPZ    | t0_EB1 | 0 | 0 | 1 | EB | 1000 | 0,0% | 0,0% | 0,0% | 0,00016 | 0,66419 | 0,000241 |
| BPS    | t0_EB1 | 0 | 0 | 1 | EB | 1000 | 0,0% | 0,0% | 0,0% | 0,00016 | 0,66419 | 0,000241 |
| BPAP   | t0_EB1 | 0 | 0 | 1 | EB | 1000 | 0,0% | 0,0% | 0,0% | 0,00016 | 0,66419 | 0,000241 |
| BPM    | t0_EB1 | 0 | 0 | 1 | EB | 1000 | 0,0% | 0,0% | 0,0% | 0,00016 | 0,66419 | 0,000241 |
| BPP    | t0_EB1 | 0 | 0 | 1 | EB | 1000 | 0,0% | 0,0% | 0,0% | 0,00016 | 0,66419 | 0,000241 |
| BPBP   | t0_EB1 | 0 | 0 | 1 | EB | 1000 | 0,0% | 0,0% | 0,0% | 0,00016 | 0,66419 | 0,000241 |
| BPPH   | t0_EB1 | 0 | 0 | 1 | EB | 1000 | 0,0% | 0,0% | 0,0% | 0,00016 | 0,66419 | 0,000241 |
| BPFL   | t0_EB1 | 0 | 0 | 1 | EB | 1000 | 0,0% | 0,0% | 0,0% | 0,00016 | 0,66419 | 0,000241 |



|        |        |   |   |   |    |      |      |      |      |         |         |          |
|--------|--------|---|---|---|----|------|------|------|------|---------|---------|----------|
| 22BPF  | t0_EB2 | 0 | 0 | 2 | EB | 1000 | 0,0% | 0,0% | 0,0% | 0,00012 | 0,42938 | 0,000279 |
| BPAF   | t0_EB2 | 0 | 0 | 2 | EB | 1000 | 0,0% | 0,0% | 0,0% | 0,00012 | 0,42938 | 0,000279 |
| 24BPF  | t0_EB2 | 0 | 0 | 2 | EB | 1000 | 0,0% | 0,0% | 0,0% | 0,00012 | 0,42938 | 0,000279 |
| 44BPF  | t0_EB2 | 0 | 0 | 2 | EB | 1000 | 0,0% | 0,0% | 0,0% | 0,00012 | 0,42938 | 0,000279 |
| BPE    | t0_EB2 | 0 | 0 | 2 | EB | 1000 | 0,0% | 0,0% | 0,0% | 0,00012 | 0,42938 | 0,000279 |
| BPA    | t0_EB2 | 0 | 0 | 2 | EB | 1000 | 0,0% | 0,0% | 0,0% | 0,00012 | 0,42938 | 0,000279 |
| BPC    | t0_EB2 | 0 | 0 | 2 | EB | 1000 | 0,0% | 0,0% | 0,0% | 0,00012 | 0,42938 | 0,000279 |
| BPB    | t0_EB2 | 0 | 0 | 2 | EB | 1000 | 0,0% | 0,0% | 0,0% | 0,00012 | 0,42938 | 0,000279 |
| BP26DM | t0_EB2 | 0 | 0 | 2 | EB | 1000 | 0,0% | 0,0% | 0,0% | 0,00012 | 0,42938 | 0,000279 |
| BPC2   | t0_EB2 | 0 | 0 | 2 | EB | 1000 | 0,0% | 0,0% | 0,0% | 0,00012 | 0,42938 | 0,000279 |
| BPZ    | t0_EB2 | 0 | 0 | 2 | EB | 1000 | 0,0% | 0,0% | 0,0% | 0,00012 | 0,42938 | 0,000279 |
| BPS    | t0_EB2 | 0 | 0 | 2 | EB | 1000 | 0,0% | 0,0% | 0,0% | 0,00012 | 0,42938 | 0,000279 |
| BPAP   | t0_EB2 | 0 | 0 | 2 | EB | 1000 | 0,0% | 0,0% | 0,0% | 0,00012 | 0,42938 | 0,000279 |
| BPM    | t0_EB2 | 0 | 0 | 2 | EB | 1000 | 0,0% | 0,0% | 0,0% | 0,00012 | 0,42938 | 0,000279 |
| BPP    | t0_EB2 | 0 | 0 | 2 | EB | 1000 | 0,0% | 0,0% | 0,0% | 0,00012 | 0,42938 | 0,000279 |
| BPBP   | t0_EB2 | 0 | 0 | 2 | EB | 1000 | 0,0% | 0,0% | 0,0% | 0,00012 | 0,42938 | 0,000279 |
| BPPH   | t0_EB2 | 0 | 0 | 2 | EB | 1000 | 0,0% | 0,0% | 0,0% | 0,00012 | 0,42938 | 0,000279 |
| BPFL   | t0_EB2 | 0 | 0 | 2 | EB | 1000 | 0,0% | 0,0% | 0,0% | 0,00012 | 0,42938 | 0,000279 |
| 22BPF  | t0_EB3 | 0 | 0 | 3 | EB | 1000 | 0,0% | 0,0% | 0,0% | 0,00028 | 0,51067 | 0,000548 |
| BPAF   | t0_EB3 | 0 | 0 | 3 | EB | 1000 | 0,0% | 0,0% | 0,0% | 0,00028 | 0,51067 | 0,000548 |
| 24BPF  | t0_EB3 | 0 | 0 | 3 | EB | 1000 | 0,0% | 0,0% | 0,0% | 0,00028 | 0,51067 | 0,000548 |
| 44BPF  | t0_EB3 | 0 | 0 | 3 | EB | 1000 | 0,0% | 0,0% | 0,0% | 0,00028 | 0,51067 | 0,000548 |
| BPE    | t0_EB3 | 0 | 0 | 3 | EB | 1000 | 0,0% | 0,0% | 0,0% | 0,00028 | 0,51067 | 0,000548 |
| BPA    | t0_EB3 | 0 | 0 | 3 | EB | 1000 | 0,0% | 0,0% | 0,0% | 0,00028 | 0,51067 | 0,000548 |
| BPC    | t0_EB3 | 0 | 0 | 3 | EB | 1000 | 0,0% | 0,0% | 0,0% | 0,00028 | 0,51067 | 0,000548 |
| BPB    | t0_EB3 | 0 | 0 | 3 | EB | 1000 | 0,0% | 0,0% | 0,0% | 0,00028 | 0,51067 | 0,000548 |
| BP26DM | t0_EB3 | 0 | 0 | 3 | EB | 1000 | 0,0% | 0,0% | 0,0% | 0,00028 | 0,51067 | 0,000548 |
| BPC2   | t0_EB3 | 0 | 0 | 3 | EB | 1000 | 0,0% | 0,0% | 0,0% | 0,00028 | 0,51067 | 0,000548 |
| BPZ    | t0_EB3 | 0 | 0 | 3 | EB | 1000 | 0,0% | 0,0% | 0,0% | 0,00028 | 0,51067 | 0,000548 |
| BPS    | t0_EB3 | 0 | 0 | 3 | EB | 1000 | 0,0% | 0,0% | 0,0% | 0,00028 | 0,51067 | 0,000548 |
| BPAP   | t0_EB3 | 0 | 0 | 3 | EB | 1000 | 0,0% | 0,0% | 0,0% | 0,00028 | 0,51067 | 0,000548 |
| BPM    | t0_EB3 | 0 | 0 | 3 | EB | 1000 | 0,0% | 0,0% | 0,0% | 0,00028 | 0,51067 | 0,000548 |
| BPP    | t0_EB3 | 0 | 0 | 3 | EB | 1000 | 0,0% | 0,0% | 0,0% | 0,00028 | 0,51067 | 0,000548 |
| BPBP   | t0_EB3 | 0 | 0 | 3 | EB | 1000 | 0,0% | 0,0% | 0,0% | 0,00028 | 0,51067 | 0,000548 |
| BPPH   | t0_EB3 | 0 | 0 | 3 | EB | 1000 | 0,0% | 0,0% | 0,0% | 0,00028 | 0,51067 | 0,000548 |
| BPFL   | t0_EB3 | 0 | 0 | 3 | EB | 1000 | 0,0% | 0,0% | 0,0% | 0,00028 | 0,51067 | 0,000548 |
| 22BPF  | t0_EK1 | 0 | 0 | 1 | EK | 1000 | 0,0% | 0,0% | 0,0% | 1,00036 | 0,64235 | 1,557344 |
| BPAF   | t0_EK1 | 0 | 0 | 1 | EK | 1000 | 0,0% | 0,0% | 0,0% | 1,00036 | 0,64235 | 1,557344 |
| 24BPF  | t0_EK1 | 0 | 0 | 1 | EK | 1000 | 0,0% | 0,0% | 0,0% | 1,00036 | 0,64235 | 1,557344 |
| 44BPF  | t0_EK1 | 0 | 0 | 1 | EK | 1000 | 0,0% | 0,0% | 0,0% | 1,00036 | 0,64235 | 1,557344 |
| BPE    | t0_EK1 | 0 | 0 | 1 | EK | 1000 | 0,0% | 0,0% | 0,0% | 1,00036 | 0,64235 | 1,557344 |
| BPA    | t0_EK1 | 0 | 0 | 1 | EK | 1000 | 0,0% | 0,0% | 0,0% | 1,00036 | 0,64235 | 1,557344 |
| BPC    | t0_EK1 | 0 | 0 | 1 | EK | 1000 | 0,0% | 0,0% | 0,0% | 1,00036 | 0,64235 | 1,557344 |
| BPB    | t0_EK1 | 0 | 0 | 1 | EK | 1000 | 0,0% | 0,0% | 0,0% | 1,00036 | 0,64235 | 1,557344 |
| BP26DM | t0_EK1 | 0 | 0 | 1 | EK | 1000 | 0,0% | 0,0% | 0,0% | 1,00036 | 0,64235 | 1,557344 |
| BPC2   | t0_EK1 | 0 | 0 | 1 | EK | 1000 | 0,0% | 0,0% | 0,0% | 1,00036 | 0,64235 | 1,557344 |
| BPZ    | t0_EK1 | 0 | 0 | 1 | EK | 1000 | 0,0% | 0,0% | 0,0% | 1,00036 | 0,64235 | 1,557344 |
| BPS    | t0_EK1 | 0 | 0 | 1 | EK | 1000 | 0,0% | 0,0% | 0,0% | 1,00036 | 0,64235 | 1,557344 |
| BPAP   | t0_EK1 | 0 | 0 | 1 | EK | 1000 | 0,0% | 0,0% | 0,0% | 1,00036 | 0,64235 | 1,557344 |
| BPM    | t0_EK1 | 0 | 0 | 1 | EK | 1000 | 0,0% | 0,0% | 0,0% | 1,00036 | 0,64235 | 1,557344 |
| BPP    | t0_EK1 | 0 | 0 | 1 | EK | 1000 | 0,0% | 0,0% | 0,0% | 1,00036 | 0,64235 | 1,557344 |
| BPBP   | t0_EK1 | 0 | 0 | 1 | EK | 1000 | 0,0% | 0,0% | 0,0% | 1,00036 | 0,64235 | 1,557344 |
| BPPH   | t0_EK1 | 0 | 0 | 1 | EK | 1000 | 0,0% | 0,0% | 0,0% | 1,00036 | 0,64235 | 1,557344 |
| BPFL   | t0_EK1 | 0 | 0 | 1 | EK | 1000 | 0,0% | 0,0% | 0,0% | 1,00036 | 0,64235 | 1,557344 |
| 22BPF  | t0_EK2 | 0 | 0 | 2 | EK | 1000 | 0,0% | 0,0% | 0,0% | 0,97488 | 0,43928 | 2,219268 |
| BPAF   | t0_EK2 | 0 | 0 | 2 | EK | 1000 | 0,0% | 0,0% | 0,0% | 0,97488 | 0,43928 | 2,219268 |
| 24BPF  | t0_EK2 | 0 | 0 | 2 | EK | 1000 | 0,0% | 0,0% | 0,0% | 0,97488 | 0,43928 | 2,219268 |
| 44BPF  | t0_EK2 | 0 | 0 | 2 | EK | 1000 | 0,0% | 0,0% | 0,0% | 0,97488 | 0,43928 | 2,219268 |
| BPE    | t0_EK2 | 0 | 0 | 2 | EK | 1000 | 0,0% | 0,0% | 0,0% | 0,97488 | 0,43928 | 2,219268 |
| BPA    | t0_EK2 | 0 | 0 | 2 | EK | 1000 | 0,0% | 0,0% | 0,0% | 0,97488 | 0,43928 | 2,219268 |
| BPC    | t0_EK2 | 0 | 0 | 2 | EK | 1000 | 0,0% | 0,0% | 0,0% | 0,97488 | 0,43928 | 2,219268 |
| BPB    | t0_EK2 | 0 | 0 | 2 | EK | 1000 | 0,0% | 0,0% | 0,0% | 0,97488 | 0,43928 | 2,219268 |
| BP26DM | t0_EK2 | 0 | 0 | 2 | EK | 1000 | 0,0% | 0,0% | 0,0% | 0,97488 | 0,43928 | 2,219268 |
| BPC2   | t0_EK2 | 0 | 0 | 2 | EK | 1000 | 0,0% | 0,0% | 0,0% | 0,97488 | 0,43928 | 2,219268 |
| BPZ    | t0_EK2 | 0 | 0 | 2 | EK | 1000 | 0,0% | 0,0% | 0,0% | 0,97488 | 0,43928 | 2,219268 |
| BPS    | t0_EK2 | 0 | 0 | 2 | EK | 1000 | 0,0% | 0,0% | 0,0% | 0,97488 | 0,43928 | 2,219268 |
| BPAP   | t0_EK2 | 0 | 0 | 2 | EK | 1000 | 0,0% | 0,0% | 0,0% | 0,97488 | 0,43928 | 2,219268 |
| BPM    | t0_EK2 | 0 | 0 | 2 | EK | 1000 | 0,0% | 0,0% | 0,0% | 0,97488 | 0,43928 | 2,219268 |
| BPP    | t0_EK2 | 0 | 0 | 2 | EK | 1000 | 0,0% | 0,0% | 0,0% | 0,97488 | 0,43928 | 2,219268 |
| BPBP   | t0_EK2 | 0 | 0 | 2 | EK | 1000 | 0,0% | 0,0% | 0,0% | 0,97488 | 0,43928 | 2,219268 |
| BPPH   | t0_EK2 | 0 | 0 | 2 | EK | 1000 | 0,0% | 0,0% | 0,0% | 0,97488 | 0,43928 | 2,219268 |
| BPFL   | t0_EK2 | 0 | 0 | 2 | EK | 1000 | 0,0% | 0,0% | 0,0% | 0,97488 | 0,43928 | 2,219268 |
| 22BPF  | t0_EK3 | 0 | 0 | 3 | EK | 1000 | 0,0% | 0,0% | 0,0% | 1,00555 | 0,50885 | 1,976123 |
| BPAF   | t0_EK3 | 0 | 0 | 3 | EK | 1000 | 0,0% | 0,0% | 0,0% | 1,00555 | 0,50885 | 1,976123 |
| 24BPF  | t0_EK3 | 0 | 0 | 3 | EK | 1000 | 0,0% | 0,0% | 0,0% | 1,00555 | 0,50885 | 1,976123 |
| 44BPF  | t0_EK3 | 0 | 0 | 3 | EK | 1000 | 0,0% | 0,0% | 0,0% | 1,00555 | 0,50885 | 1,976123 |
| BPE    | t0_EK3 | 0 | 0 | 3 | EK | 1000 | 0,0% | 0,0% | 0,0% | 1,00555 | 0,50885 | 1,976123 |
| BPA    | t0_EK3 | 0 | 0 | 3 | EK | 1000 | 0,0% | 0,0% | 0,0% | 1,00555 | 0,50885 | 1,976123 |
| BPC    | t0_EK3 | 0 | 0 | 3 | EK | 1000 | 0,0% | 0,0% | 0,0% | 1,00555 | 0,50885 | 1,976123 |
| BPB    | t0_EK3 | 0 | 0 | 3 | EK | 1000 | 0,0% | 0,0% | 0,0% | 1,00555 | 0,50885 | 1,976123 |
| BP26DM | t0_EK3 | 0 | 0 | 3 | EK | 1000 | 0,0% | 0,0% | 0,0% | 1,00555 | 0,50885 | 1,976123 |
| BPC2   | t0_EK3 | 0 | 0 | 3 | EK | 1000 | 0,0% | 0,0% | 0,0% | 1,00555 | 0,50885 | 1,976123 |
| BPZ    | t0_EK3 | 0 | 0 | 3 | EK | 1000 | 0,0% | 0,0% | 0,0% | 1,00555 | 0,50885 | 1,976123 |
| BPS    | t0_EK3 | 0 | 0 | 3 | EK | 1000 | 0,0% | 0,0% | 0,0% | 1,00555 | 0,50885 | 1,976123 |
| BPAP   | t0_EK3 | 0 | 0 | 3 | EK | 1000 | 0,0% | 0,0% | 0,0% | 1,00555 | 0,50885 | 1,976123 |
| BPM    | t0_EK3 | 0 | 0 | 3 | EK | 1000 | 0,0% | 0,0% | 0,0% | 1,00555 | 0,50885 | 1,976123 |

|        |         |   |      |     |            |       |       |      |         |         |          |
|--------|---------|---|------|-----|------------|-------|-------|------|---------|---------|----------|
| BPP    | t0_EK3  | 0 | 0 3  | EK  | 1000       | 0,0%  | 0,0%  | 0,0% | 1,00555 | 0,50885 | 1,976123 |
| BPBP   | t0_EK3  | 0 | 0 3  | EK  | 1000       | 0,0%  | 0,0%  | 0,0% | 1,00555 | 0,50885 | 1,976123 |
| BPPH   | t0_EK3  | 0 | 0 3  | EK  | 1000       | 0,0%  | 0,0%  | 0,0% | 1,00555 | 0,50885 | 1,976123 |
| BPFL   | t0_EK3  | 0 | 0 3  | EK  | 1000       | 0,0%  | 0,0%  | 0,0% | 1,00555 | 0,50885 | 1,976123 |
| 22BPF  | t3_ABS1 | 3 | 72 1 | ABS | 1032,18614 | -3,2% | -3,2% | 0,0% | 0       | 0,034   | 0        |
| BPAF   | t3_ABS1 | 3 | 72 1 | ABS | 913,694213 | 8,6%  | 8,6%  | 0,0% | 0       | 0,034   | 0        |
| 24BPF  | t3_ABS1 | 3 | 72 1 | ABS | 1037,73318 | -3,8% | -3,8% | 0,0% | 0       | 0,034   | 0        |
| 44BPF  | t3_ABS1 | 3 | 72 1 | ABS | 879,768231 | 12,0% | 12,0% | 0,0% | 0       | 0,034   | 0        |
| BPE    | t3_ABS1 | 3 | 72 1 | ABS | 885,206522 | 11,5% | 11,5% | 0,0% | 0       | 0,034   | 0        |
| BPA    | t3_ABS1 | 3 | 72 1 | ABS | 828,731549 | 17,1% | 17,1% | 0,0% | 0       | 0,034   | 0        |
| BPC    | t3_ABS1 | 3 | 72 1 | ABS | 829,904751 | 17,0% | 17,0% | 0,0% | 0       | 0,034   | 0        |
| BPB    | t3_ABS1 | 3 | 72 1 | ABS | 882,012963 | 11,8% | 11,8% | 0,0% | 0       | 0,034   | 0        |
| BP26DM | t3_ABS1 | 3 | 72 1 | ABS | 679,017373 | 32,1% | 32,1% | 0,0% | 0       | 0,034   | 0        |
| BPC2   | t3_ABS1 | 3 | 72 1 | ABS | 767,694845 | 23,2% | 23,2% | 0,0% | 0       | 0,034   | 0        |
| BPZ    | t3_ABS1 | 3 | 72 1 | ABS | 1064,55535 | -6,5% | -6,5% | 0,0% | 0       | 0,034   | 0        |
| BPS    | t3_ABS1 | 3 | 72 1 | ABS | 839,808876 | 16,0% | 16,0% | 0,0% | 0       | 0,034   | 0        |
| BPAP   | t3_ABS1 | 3 | 72 1 | ABS | 1017,16407 | -1,7% | -1,7% | 0,0% | 0       | 0,034   | 0        |
| BPM    | t3_ABS1 | 3 | 72 1 | ABS | 460,183959 | 54,0% | 54,0% | 0,0% | 0       | 0,034   | 0        |
| BPP    | t3_ABS1 | 3 | 72 1 | ABS | 323,676398 | 67,6% | 67,6% | 0,0% | 0       | 0,034   | 0        |
| BPBP   | t3_ABS1 | 3 | 72 1 | ABS | 534,543084 | 46,5% | 46,5% | 0,0% | 0       | 0,034   | 0        |
| BPPH   | t3_ABS1 | 3 | 72 1 | ABS | 142,911919 | 85,7% | 85,7% | 0,0% | 0       | 0,034   | 0        |
| BPFL   | t3_ABS1 | 3 | 72 1 | ABS | 508,18943  | 49,2% | 49,2% | 0,0% | 0       | 0,034   | 0        |
| 22BPF  | t3_ABS2 | 3 | 72 2 | ABS | 801,506669 | 19,8% | 19,8% | 0,0% | 0,001   | 0,063   | 0,015873 |
| BPAF   | t3_ABS2 | 3 | 72 2 | ABS | 812,072437 | 18,8% | 18,8% | 0,0% | 0,001   | 0,063   | 0,015873 |
| 24BPF  | t3_ABS2 | 3 | 72 2 | ABS | 784,813498 | 21,5% | 21,5% | 0,0% | 0,001   | 0,063   | 0,015873 |
| 44BPF  | t3_ABS2 | 3 | 72 2 | ABS | 808,702924 | 19,1% | 19,1% | 0,0% | 0,001   | 0,063   | 0,015873 |
| BPE    | t3_ABS2 | 3 | 72 2 | ABS | 694,044442 | 30,6% | 30,6% | 0,0% | 0,001   | 0,063   | 0,015873 |
| BPA    | t3_ABS2 | 3 | 72 2 | ABS | 856,620946 | 14,3% | 14,3% | 0,0% | 0,001   | 0,063   | 0,015873 |
| BPC    | t3_ABS2 | 3 | 72 2 | ABS | 796,091741 | 20,4% | 20,4% | 0,0% | 0,001   | 0,063   | 0,015873 |
| BPB    | t3_ABS2 | 3 | 72 2 | ABS | 803,489942 | 19,7% | 19,7% | 0,0% | 0,001   | 0,063   | 0,015873 |
| BP26DM | t3_ABS2 | 3 | 72 2 | ABS | 702,406275 | 29,8% | 29,8% | 0,0% | 0,001   | 0,063   | 0,015873 |
| BPC2   | t3_ABS2 | 3 | 72 2 | ABS | 712,921175 | 28,7% | 28,7% | 0,0% | 0,001   | 0,063   | 0,015873 |
| BPZ    | t3_ABS2 | 3 | 72 2 | ABS | 793,994873 | 20,6% | 20,6% | 0,0% | 0,001   | 0,063   | 0,015873 |
| BPS    | t3_ABS2 | 3 | 72 2 | ABS | 798,866812 | 20,1% | 20,1% | 0,0% | 0,001   | 0,063   | 0,015873 |
| BPAP   | t3_ABS2 | 3 | 72 2 | ABS | 762,564922 | 23,7% | 23,7% | 0,0% | 0,001   | 0,063   | 0,015873 |
| BPM    | t3_ABS2 | 3 | 72 2 | ABS | 369,684849 | 63,0% | 63,0% | 0,0% | 0,001   | 0,063   | 0,015873 |
| BPP    | t3_ABS2 | 3 | 72 2 | ABS | 241,048793 | 75,9% | 75,9% | 0,0% | 0,001   | 0,063   | 0,015873 |
| BPBP   | t3_ABS2 | 3 | 72 2 | ABS | 428,405579 | 57,2% | 57,2% | 0,0% | 0,001   | 0,063   | 0,015873 |
| BPPH   | t3_ABS2 | 3 | 72 2 | ABS | 91,0362056 | 90,9% | 90,9% | 0,0% | 0,001   | 0,063   | 0,015873 |
| BPFL   | t3_ABS2 | 3 | 72 2 | ABS | 465,492998 | 53,5% | 53,5% | 0,0% | 0,001   | 0,063   | 0,015873 |
| 22BPF  | t3_ABS3 | 3 | 72 3 | ABS | 748,586497 | 25,1% | 25,1% | 0,0% | 0       | 0,03    | 0        |
| BPAF   | t3_ABS3 | 3 | 72 3 | ABS | 680,994889 | 31,9% | 31,9% | 0,0% | 0       | 0,03    | 0        |
| 24BPF  | t3_ABS3 | 3 | 72 3 | ABS | 681,199678 | 31,9% | 31,9% | 0,0% | 0       | 0,03    | 0        |
| 44BPF  | t3_ABS3 | 3 | 72 3 | ABS | 783,988098 | 21,6% | 21,6% | 0,0% | 0       | 0,03    | 0        |
| BPE    | t3_ABS3 | 3 | 72 3 | ABS | 718,177485 | 28,2% | 28,2% | 0,0% | 0       | 0,03    | 0        |
| BPA    | t3_ABS3 | 3 | 72 3 | ABS | 874,213516 | 12,6% | 12,6% | 0,0% | 0       | 0,03    | 0        |
| BPC    | t3_ABS3 | 3 | 72 3 | ABS | 753,889916 | 24,6% | 24,6% | 0,0% | 0       | 0,03    | 0        |
| BPB    | t3_ABS3 | 3 | 72 3 | ABS | 767,410514 | 23,3% | 23,3% | 0,0% | 0       | 0,03    | 0        |
| BP26DM | t3_ABS3 | 3 | 72 3 | ABS | 688,179098 | 31,2% | 31,2% | 0,0% | 0       | 0,03    | 0        |
| BPC2   | t3_ABS3 | 3 | 72 3 | ABS | 679,208205 | 32,1% | 32,1% | 0,0% | 0       | 0,03    | 0        |
| BPZ    | t3_ABS3 | 3 | 72 3 | ABS | 779,431349 | 22,1% | 22,1% | 0,0% | 0       | 0,03    | 0        |
| BPS    | t3_ABS3 | 3 | 72 3 | ABS | 755,991738 | 24,4% | 24,4% | 0,0% | 0       | 0,03    | 0        |
| BPAP   | t3_ABS3 | 3 | 72 3 | ABS | 741,352533 | 25,9% | 25,9% | 0,0% | 0       | 0,03    | 0        |
| BPM    | t3_ABS3 | 3 | 72 3 | ABS | 421,102998 | 57,9% | 57,9% | 0,0% | 0       | 0,03    | 0        |
| BPP    | t3_ABS3 | 3 | 72 3 | ABS | 314,075147 | 68,6% | 68,6% | 0,0% | 0       | 0,03    | 0        |
| BPBP   | t3_ABS3 | 3 | 72 3 | ABS | 458,908215 | 54,1% | 54,1% | 0,0% | 0       | 0,03    | 0        |
| BPPH   | t3_ABS3 | 3 | 72 3 | ABS | 178,263569 | 82,2% | 82,2% | 0,0% | 0       | 0,03    | 0        |
| BPFL   | t3_ABS3 | 3 | 72 3 | ABS | 421,39684  | 57,9% | 57,9% | 0,0% | 0       | 0,03    | 0        |
| 22BPF  | t3_ABT1 | 3 | 72 1 | ABT | 945,047862 | 5,5%  | 5,5%  | 0,0% | 0,001   | 0,053   | 0,018868 |
| BPAF   | t3_ABT1 | 3 | 72 1 | ABT | 841,025229 | 15,9% | 15,9% | 0,0% | 0,001   | 0,053   | 0,018868 |
| 24BPF  | t3_ABT1 | 3 | 72 1 | ABT | 891,235949 | 10,9% | 10,9% | 0,0% | 0,001   | 0,053   | 0,018868 |
| 44BPF  | t3_ABT1 | 3 | 72 1 | ABT | 811,76429  | 18,8% | 18,8% | 0,0% | 0,001   | 0,053   | 0,018868 |
| BPE    | t3_ABT1 | 3 | 72 1 | ABT | 806,057157 | 19,4% | 19,4% | 0,0% | 0,001   | 0,053   | 0,018868 |
| BPA    | t3_ABT1 | 3 | 72 1 | ABT | 776,923147 | 22,3% | 22,3% | 0,0% | 0,001   | 0,053   | 0,018868 |
| BPC    | t3_ABT1 | 3 | 72 1 | ABT | 747,618865 | 25,2% | 25,2% | 0,0% | 0,001   | 0,053   | 0,018868 |
| BPB    | t3_ABT1 | 3 | 72 1 | ABT | 800,391538 | 20,0% | 20,0% | 0,0% | 0,001   | 0,053   | 0,018868 |
| BP26DM | t3_ABT1 | 3 | 72 1 | ABT | 681,699048 | 31,8% | 31,8% | 0,0% | 0,001   | 0,053   | 0,018868 |
| BPC2   | t3_ABT1 | 3 | 72 1 | ABT | 733,138464 | 26,7% | 26,7% | 0,0% | 0,001   | 0,053   | 0,018868 |
| BPZ    | t3_ABT1 | 3 | 72 1 | ABT | 778,245719 | 22,2% | 22,2% | 0,0% | 0,001   | 0,053   | 0,018868 |
| BPS    | t3_ABT1 | 3 | 72 1 | ABT | 810,781103 | 18,9% | 18,9% | 0,0% | 0,001   | 0,053   | 0,018868 |
| BPAP   | t3_ABT1 | 3 | 72 1 | ABT | 756,023602 | 24,4% | 24,4% | 0,0% | 0,001   | 0,053   | 0,018868 |
| BPM    | t3_ABT1 | 3 | 72 1 | ABT | 373,348182 | 62,7% | 62,7% | 0,0% | 0,001   | 0,053   | 0,018868 |
| BPP    | t3_ABT1 | 3 | 72 1 | ABT | 337,548632 | 66,2% | 66,2% | 0,0% | 0,001   | 0,053   | 0,018868 |
| BPBP   | t3_ABT1 | 3 | 72 1 | ABT | 555,24421  | 44,5% | 44,5% | 0,0% | 0,001   | 0,053   | 0,018868 |
| BPPH   | t3_ABT1 | 3 | 72 1 | ABT | 137,225904 | 86,3% | 86,3% | 0,0% | 0,001   | 0,053   | 0,018868 |
| BPFL   | t3_ABT1 | 3 | 72 1 | ABT | 497,170633 | 50,3% | 50,3% | 0,0% | 0,001   | 0,053   | 0,018868 |
| 22BPF  | t3_ABT2 | 3 | 72 2 | ABT | 796,016853 | 20,4% | 20,4% | 0,0% | 0       | 0,046   | 0        |
| BPAF   | t3_ABT2 | 3 | 72 2 | ABT | 673,009085 | 32,7% | 32,7% | 0,0% | 0       | 0,046   | 0        |
| 24BPF  | t3_ABT2 | 3 | 72 2 | ABT | 786,060366 | 21,4% | 21,4% | 0,0% | 0       | 0,046   | 0        |
| 44BPF  | t3_ABT2 | 3 | 72 2 | ABT | 830,664717 | 16,9% | 16,9% | 0,0% | 0       | 0,046   | 0        |
| BPE    | t3_ABT2 | 3 | 72 2 | ABT | 794,691559 | 20,5% | 20,5% | 0,0% | 0       | 0,046   | 0        |
| BPA    | t3_ABT2 | 3 | 72 2 | ABT | 806,882865 | 19,3% | 19,3% | 0,0% | 0       | 0,046   | 0        |
| BPC    | t3_ABT2 | 3 | 72 2 | ABT | 746,002346 | 25,4% | 25,4% | 0,0% | 0       | 0,046   | 0        |
| BPB    | t3_ABT2 | 3 | 72 2 | ABT | 804,855092 | 19,5% | 19,5% | 0,0% | 0       | 0,046   | 0        |
| BP26DM | t3_ABT2 | 3 | 72 2 | ABT | 616,470793 | 38,4% | 38,4% | 0,0% | 0       | 0,046   | 0        |
| BPC2   | t3_ABT2 | 3 | 72 2 | ABT | 760,029278 | 24,0% | 24,0% | 0,0% | 0       | 0,046   | 0        |

|        |         |   |      |     |            |        |        |      |       |       |          |
|--------|---------|---|------|-----|------------|--------|--------|------|-------|-------|----------|
| BPZ    | t3_ABT2 | 3 | 72 2 | ABT | 781,09527  | 21,9%  | 21,9%  | 0,0% | 0     | 0,046 | 0        |
| BPS    | t3_ABT2 | 3 | 72 2 | ABT | 827,963536 | 17,2%  | 17,2%  | 0,0% | 0     | 0,046 | 0        |
| BPAP   | t3_ABT2 | 3 | 72 2 | ABT | 763,525525 | 23,6%  | 23,6%  | 0,0% | 0     | 0,046 | 0        |
| BPM    | t3_ABT2 | 3 | 72 2 | ABT | 395,040702 | 60,5%  | 60,5%  | 0,0% | 0     | 0,046 | 0        |
| BPP    | t3_ABT2 | 3 | 72 2 | ABT | 301,018502 | 69,9%  | 69,9%  | 0,0% | 0     | 0,046 | 0        |
| BPBP   | t3_ABT2 | 3 | 72 2 | ABT | 490,806787 | 50,9%  | 50,9%  | 0,0% | 0     | 0,046 | 0        |
| BPPH   | t3_ABT2 | 3 | 72 2 | ABT | 149,467673 | 85,1%  | 85,1%  | 0,0% | 0     | 0,046 | 0        |
| BPFL   | t3_ABT2 | 3 | 72 2 | ABT | 491,790182 | 50,8%  | 50,8%  | 0,0% | 0     | 0,046 | 0        |
| 22BPF  | t3_ABT3 | 3 | 72 3 | ABT | 970,457937 | 3,0%   | 3,0%   | 0,0% | 0     | 0,054 | 0        |
| BPAF   | t3_ABT3 | 3 | 72 3 | ABT | 835,382988 | 16,5%  | 16,5%  | 0,0% | 0     | 0,054 | 0        |
| 24BPF  | t3_ABT3 | 3 | 72 3 | ABT | 943,821786 | 5,6%   | 5,6%   | 0,0% | 0     | 0,054 | 0        |
| 44BPF  | t3_ABT3 | 3 | 72 3 | ABT | 790,826962 | 20,9%  | 20,9%  | 0,0% | 0     | 0,054 | 0        |
| BPE    | t3_ABT3 | 3 | 72 3 | ABT | 794,070328 | 20,6%  | 20,6%  | 0,0% | 0     | 0,054 | 0        |
| BPA    | t3_ABT3 | 3 | 72 3 | ABT | 747,074553 | 25,3%  | 25,3%  | 0,0% | 0     | 0,054 | 0        |
| BPC    | t3_ABT3 | 3 | 72 3 | ABT | 748,426751 | 25,2%  | 25,2%  | 0,0% | 0     | 0,054 | 0        |
| BPB    | t3_ABT3 | 3 | 72 3 | ABT | 776,87516  | 22,3%  | 22,3%  | 0,0% | 0     | 0,054 | 0        |
| BP26DM | t3_ABT3 | 3 | 72 3 | ABT | 630,4753   | 37,0%  | 37,0%  | 0,0% | 0     | 0,054 | 0        |
| BPC2   | t3_ABT3 | 3 | 72 3 | ABT | 729,674163 | 27,0%  | 27,0%  | 0,0% | 0     | 0,054 | 0        |
| BPZ    | t3_ABT3 | 3 | 72 3 | ABT | 757,706205 | 24,2%  | 24,2%  | 0,0% | 0     | 0,054 | 0        |
| BPS    | t3_ABT3 | 3 | 72 3 | ABT | 795,400597 | 20,5%  | 20,5%  | 0,0% | 0     | 0,054 | 0        |
| BPAP   | t3_ABT3 | 3 | 72 3 | ABT | 732,955302 | 26,7%  | 26,7%  | 0,0% | 0     | 0,054 | 0        |
| BPM    | t3_ABT3 | 3 | 72 3 | ABT | 421,474694 | 57,9%  | 57,9%  | 0,0% | 0     | 0,054 | 0        |
| BPP    | t3_ABT3 | 3 | 72 3 | ABT | 389,60119  | 61,0%  | 61,0%  | 0,0% | 0     | 0,054 | 0        |
| BPBP   | t3_ABT3 | 3 | 72 3 | ABT | 570,170243 | 43,0%  | 43,0%  | 0,0% | 0     | 0,054 | 0        |
| BPPH   | t3_ABT3 | 3 | 72 3 | ABT | 217,74787  | 78,2%  | 78,2%  | 0,0% | 0     | 0,054 | 0        |
| BPFL   | t3_ABT3 | 3 | 72 3 | ABT | 532,528151 | 46,7%  | 46,7%  | 0,0% | 0     | 0,054 | 0        |
| 22BPF  | t3_BA1  | 3 | 72 1 | BA  | 1,56707076 | 99,8%  | 99,8%  | 0,0% | 1,459 | 0,301 | 4,847176 |
| BPAF   | t3_BA1  | 3 | 72 1 | BA  | 1,56024001 | 99,8%  | 99,8%  | 0,0% | 1,459 | 0,301 | 4,847176 |
| 24BPF  | t3_BA1  | 3 | 72 1 | BA  | 0,72415293 | 99,9%  | 99,9%  | 0,0% | 1,459 | 0,301 | 4,847176 |
| 44BPF  | t3_BA1  | 3 | 72 1 | BA  | 0,24758326 | 100,0% | 100,0% | 0,0% | 1,459 | 0,301 | 4,847176 |
| BPE    | t3_BA1  | 3 | 72 1 | BA  | 0,36801583 | 100,0% | 100,0% | 0,0% | 1,459 | 0,301 | 4,847176 |
| BPA    | t3_BA1  | 3 | 72 1 | BA  | 98,1052651 | 90,2%  | 90,2%  | 0,0% | 1,459 | 0,301 | 4,847176 |
| BPC    | t3_BA1  | 3 | 72 1 | BA  | 0,16976512 | 100,0% | 100,0% | 0,0% | 1,459 | 0,301 | 4,847176 |
| BPB    | t3_BA1  | 3 | 72 1 | BA  | 0,15682209 | 100,0% | 100,0% | 0,0% | 1,459 | 0,301 | 4,847176 |
| BP26DM | t3_BA1  | 3 | 72 1 | BA  | 0,02721666 | 100,0% | 100,0% | 0,0% | 1,459 | 0,301 | 4,847176 |
| BPC2   | t3_BA1  | 3 | 72 1 | BA  | 0,1961482  | 100,0% | 100,0% | 0,0% | 1,459 | 0,301 | 4,847176 |
| BPZ    | t3_BA1  | 3 | 72 1 | BA  | 0,20147909 | 100,0% | 100,0% | 0,0% | 1,459 | 0,301 | 4,847176 |
| BPS    | t3_BA1  | 3 | 72 1 | BA  | 7,46885774 | 99,3%  | 99,3%  | 0,0% | 1,459 | 0,301 | 4,847176 |
| BPAP   | t3_BA1  | 3 | 72 1 | BA  | 0,2255244  | 100,0% | 100,0% | 0,0% | 1,459 | 0,301 | 4,847176 |
| BPM    | t3_BA1  | 3 | 72 1 | BA  | 0,04715453 | 100,0% | 100,0% | 0,0% | 1,459 | 0,301 | 4,847176 |
| BPP    | t3_BA1  | 3 | 72 1 | BA  | 0,98130319 | 99,9%  | 99,9%  | 0,0% | 1,459 | 0,301 | 4,847176 |
| BPBP   | t3_BA1  | 3 | 72 1 | BA  | 0,38503504 | 100,0% | 100,0% | 0,0% | 1,459 | 0,301 | 4,847176 |
| BPPH   | t3_BA1  | 3 | 72 1 | BA  | 0,0357408  | 100,0% | 100,0% | 0,0% | 1,459 | 0,301 | 4,847176 |
| BPFL   | t3_BA1  | 3 | 72 1 | BA  | 0,72415855 | 99,9%  | 99,9%  | 0,0% | 1,459 | 0,301 | 4,847176 |
| 22BPF  | t3_BA2  | 3 | 72 2 | BA  | 0,25729448 | 100,0% | 100,0% | 0,0% | 2,115 | 0,191 | 11,0733  |
| BPAF   | t3_BA2  | 3 | 72 2 | BA  | 1,02328781 | 99,9%  | 99,9%  | 0,0% | 2,115 | 0,191 | 11,0733  |
| 24BPF  | t3_BA2  | 3 | 72 2 | BA  | 0,59141416 | 99,9%  | 99,9%  | 0,0% | 2,115 | 0,191 | 11,0733  |
| 44BPF  | t3_BA2  | 3 | 72 2 | BA  | 0,22063779 | 100,0% | 100,0% | 0,0% | 2,115 | 0,191 | 11,0733  |
| BPE    | t3_BA2  | 3 | 72 2 | BA  | 0,38267063 | 100,0% | 100,0% | 0,0% | 2,115 | 0,191 | 11,0733  |
| BPA    | t3_BA2  | 3 | 72 2 | BA  | 0          | 100,0% | 100,0% | 0,0% | 2,115 | 0,191 | 11,0733  |
| BPC    | t3_BA2  | 3 | 72 2 | BA  | 0,02321317 | 100,0% | 100,0% | 0,0% | 2,115 | 0,191 | 11,0733  |
| BPB    | t3_BA2  | 3 | 72 2 | BA  | 0,11683125 | 100,0% | 100,0% | 0,0% | 2,115 | 0,191 | 11,0733  |
| BP26DM | t3_BA2  | 3 | 72 2 | BA  | 0,15530261 | 100,0% | 100,0% | 0,0% | 2,115 | 0,191 | 11,0733  |
| BPC2   | t3_BA2  | 3 | 72 2 | BA  | 0,06922178 | 100,0% | 100,0% | 0,0% | 2,115 | 0,191 | 11,0733  |
| BPZ    | t3_BA2  | 3 | 72 2 | BA  | 0,211622   | 100,0% | 100,0% | 0,0% | 2,115 | 0,191 | 11,0733  |
| BPS    | t3_BA2  | 3 | 72 2 | BA  | 2,30313457 | 99,8%  | 99,8%  | 0,0% | 2,115 | 0,191 | 11,0733  |
| BPAP   | t3_BA2  | 3 | 72 2 | BA  | 0,24516095 | 100,0% | 100,0% | 0,0% | 2,115 | 0,191 | 11,0733  |
| BPM    | t3_BA2  | 3 | 72 2 | BA  | 0,02050029 | 100,0% | 100,0% | 0,0% | 2,115 | 0,191 | 11,0733  |
| BPP    | t3_BA2  | 3 | 72 2 | BA  | 0,77109941 | 99,9%  | 99,9%  | 0,0% | 2,115 | 0,191 | 11,0733  |
| BPBP   | t3_BA2  | 3 | 72 2 | BA  | 0,05633084 | 100,0% | 100,0% | 0,0% | 2,115 | 0,191 | 11,0733  |
| BPPH   | t3_BA2  | 3 | 72 2 | BA  | 0,1327564  | 100,0% | 100,0% | 0,0% | 2,115 | 0,191 | 11,0733  |
| BPFL   | t3_BA2  | 3 | 72 2 | BA  | 0,44440798 | 100,0% | 100,0% | 0,0% | 2,115 | 0,191 | 11,0733  |
| 22BPF  | t3_BA3  | 3 | 72 3 | BA  | 0,40168251 | 100,0% | 100,0% | 0,0% | 2,47  | 0,167 | 14,79042 |
| BPAF   | t3_BA3  | 3 | 72 3 | BA  | 0,81010747 | 99,9%  | 99,9%  | 0,0% | 2,47  | 0,167 | 14,79042 |
| 24BPF  | t3_BA3  | 3 | 72 3 | BA  | 0,5171348  | 99,9%  | 99,9%  | 0,0% | 2,47  | 0,167 | 14,79042 |
| 44BPF  | t3_BA3  | 3 | 72 3 | BA  | 0,89913077 | 99,9%  | 99,9%  | 0,0% | 2,47  | 0,167 | 14,79042 |
| BPE    | t3_BA3  | 3 | 72 3 | BA  | 0,30060848 | 100,0% | 100,0% | 0,0% | 2,47  | 0,167 | 14,79042 |
| BPA    | t3_BA3  | 3 | 72 3 | BA  | 9,49412452 | 99,1%  | 99,1%  | 0,0% | 2,47  | 0,167 | 14,79042 |
| BPC    | t3_BA3  | 3 | 72 3 | BA  | 0,01502825 | 100,0% | 100,0% | 0,0% | 2,47  | 0,167 | 14,79042 |
| BPB    | t3_BA3  | 3 | 72 3 | BA  | 0,04485967 | 100,0% | 100,0% | 0,0% | 2,47  | 0,167 | 14,79042 |
| BP26DM | t3_BA3  | 3 | 72 3 | BA  | 0,20622278 | 100,0% | 100,0% | 0,0% | 2,47  | 0,167 | 14,79042 |
| BPC2   | t3_BA3  | 3 | 72 3 | BA  | 0,13710727 | 100,0% | 100,0% | 0,0% | 2,47  | 0,167 | 14,79042 |
| BPZ    | t3_BA3  | 3 | 72 3 | BA  | 0,04746308 | 100,0% | 100,0% | 0,0% | 2,47  | 0,167 | 14,79042 |
| BPS    | t3_BA3  | 3 | 72 3 | BA  | 1,93193506 | 99,8%  | 99,8%  | 0,0% | 2,47  | 0,167 | 14,79042 |
| BPAP   | t3_BA3  | 3 | 72 3 | BA  | 0,05871209 | 100,0% | 100,0% | 0,0% | 2,47  | 0,167 | 14,79042 |
| BPM    | t3_BA3  | 3 | 72 3 | BA  | 0,02381096 | 100,0% | 100,0% | 0,0% | 2,47  | 0,167 | 14,79042 |
| BPP    | t3_BA3  | 3 | 72 3 | BA  | 0,599321   | 99,9%  | 99,9%  | 0,0% | 2,47  | 0,167 | 14,79042 |
| BPBP   | t3_BA3  | 3 | 72 3 | BA  | 0,09041522 | 100,0% | 100,0% | 0,0% | 2,47  | 0,167 | 14,79042 |
| BPPH   | t3_BA3  | 3 | 72 3 | BA  | 0,02090573 | 100,0% | 100,0% | 0,0% | 2,47  | 0,167 | 14,79042 |
| BPFL   | t3_BA3  | 3 | 72 3 | BA  | 0,18450133 | 100,0% | 100,0% | 0,0% | 2,47  | 0,167 | 14,79042 |
| 22BPF  | t3_BB1  | 3 | 72 1 | BB  | 1,4947617  | 99,9%  | 99,9%  | 0,0% | 0     | 9,873 | 0        |
| BPAF   | t3_BB1  | 3 | 72 1 | BB  | 1,89935113 | 99,8%  | 99,8%  | 0,0% | 0     | 9,873 | 0        |
| 24BPF  | t3_BB1  | 3 | 72 1 | BB  | 1,13066908 | 99,9%  | 99,9%  | 0,0% | 0     | 9,873 | 0        |
| 44BPF  | t3_BB1  | 3 | 72 1 | BB  | 1,07156419 | 99,9%  | 99,9%  | 0,0% | 0     | 9,873 | 0        |
| BPE    | t3_BB1  | 3 | 72 1 | BB  | 0,39306027 | 100,0% | 100,0% | 0,0% | 0     | 9,873 | 0        |
| BPA    | t3_BB1  | 3 | 72 1 | BB  | 0          | 100,0% | 100,0% | 0,0% | 0     | 9,873 | 0        |

|        |        |   |      |    |            |        |        |      |       |        |          |
|--------|--------|---|------|----|------------|--------|--------|------|-------|--------|----------|
| BPC    | t3_BB1 | 3 | 72 1 | BB | 0,10028078 | 100,0% | 100,0% | 0,0% | 0     | 9,873  | 0        |
| BPB    | t3_BB1 | 3 | 72 1 | BB | 0,51096207 | 99,9%  | 99,9%  | 0,0% | 0     | 9,873  | 0        |
| BP26DM | t3_BB1 | 3 | 72 1 | BB | 0,25763786 | 100,0% | 100,0% | 0,0% | 0     | 9,873  | 0        |
| BPC2   | t3_BB1 | 3 | 72 1 | BB | 0,77625469 | 99,9%  | 99,9%  | 0,0% | 0     | 9,873  | 0        |
| BPZ    | t3_BB1 | 3 | 72 1 | BB | 0,13810709 | 100,0% | 100,0% | 0,0% | 0     | 9,873  | 0        |
| BPS    | t3_BB1 | 3 | 72 1 | BB | 5,70464337 | 99,4%  | 99,4%  | 0,0% | 0     | 9,873  | 0        |
| BPAP   | t3_BB1 | 3 | 72 1 | BB | 0,29274244 | 100,0% | 100,0% | 0,0% | 0     | 9,873  | 0        |
| BPM    | t3_BB1 | 3 | 72 1 | BB | 0,06516597 | 100,0% | 100,0% | 0,0% | 0     | 9,873  | 0        |
| BPP    | t3_BB1 | 3 | 72 1 | BB | 0,68279672 | 99,9%  | 99,9%  | 0,0% | 0     | 9,873  | 0        |
| BPBP   | t3_BB1 | 3 | 72 1 | BB | 0,12664242 | 100,0% | 100,0% | 0,0% | 0     | 9,873  | 0        |
| BPPH   | t3_BB1 | 3 | 72 1 | BB | 0,11650976 | 100,0% | 100,0% | 0,0% | 0     | 9,873  | 0        |
| BPFL   | t3_BB1 | 3 | 72 1 | BB | 0,27592375 | 100,0% | 100,0% | 0,0% | 0     | 9,873  | 0        |
| 22BPF  | t3_BB2 | 3 | 72 2 | BB | 0,62179964 | 99,9%  | 99,9%  | 0,0% | 0     | 10,077 | 0        |
| BPAF   | t3_BB2 | 3 | 72 2 | BB | 1,18784574 | 99,9%  | 99,9%  | 0,0% | 0     | 10,077 | 0        |
| 24BPF  | t3_BB2 | 3 | 72 2 | BB | 0,83074567 | 99,9%  | 99,9%  | 0,0% | 0     | 10,077 | 0        |
| 44BPF  | t3_BB2 | 3 | 72 2 | BB | 0,72337904 | 99,9%  | 99,9%  | 0,0% | 0     | 10,077 | 0        |
| BPE    | t3_BB2 | 3 | 72 2 | BB | 0,14830391 | 100,0% | 100,0% | 0,0% | 0     | 10,077 | 0        |
| BPA    | t3_BB2 | 3 | 72 2 | BB | 0          | 100,0% | 100,0% | 0,0% | 0     | 10,077 | 0        |
| BPC    | t3_BB2 | 3 | 72 2 | BB | 0,15747908 | 100,0% | 100,0% | 0,0% | 0     | 10,077 | 0        |
| BPB    | t3_BB2 | 3 | 72 2 | BB | 0,05810414 | 100,0% | 100,0% | 0,0% | 0     | 10,077 | 0        |
| BP26DM | t3_BB2 | 3 | 72 2 | BB | 0,2112777  | 100,0% | 100,0% | 0,0% | 0     | 10,077 | 0        |
| BPC2   | t3_BB2 | 3 | 72 2 | BB | 0,14319836 | 100,0% | 100,0% | 0,0% | 0     | 10,077 | 0        |
| BPZ    | t3_BB2 | 3 | 72 2 | BB | 0,09083223 | 100,0% | 100,0% | 0,0% | 0     | 10,077 | 0        |
| BPS    | t3_BB2 | 3 | 72 2 | BB | 4,04567441 | 99,6%  | 99,6%  | 0,0% | 0     | 10,077 | 0        |
| BPAP   | t3_BB2 | 3 | 72 2 | BB | 0,07358117 | 100,0% | 100,0% | 0,0% | 0     | 10,077 | 0        |
| BPM    | t3_BB2 | 3 | 72 2 | BB | 0,0669968  | 100,0% | 100,0% | 0,0% | 0     | 10,077 | 0        |
| BPP    | t3_BB2 | 3 | 72 2 | BB | 0,48985827 | 100,0% | 100,0% | 0,0% | 0     | 10,077 | 0        |
| BPBP   | t3_BB2 | 3 | 72 2 | BB | 0,08178592 | 100,0% | 100,0% | 0,0% | 0     | 10,077 | 0        |
| BPPH   | t3_BB2 | 3 | 72 2 | BB | 0,05098646 | 100,0% | 100,0% | 0,0% | 0     | 10,077 | 0        |
| BPFL   | t3_BB2 | 3 | 72 2 | BB | 0,07890223 | 100,0% | 100,0% | 0,0% | 0     | 10,077 | 0        |
| 22BPF  | t3_BB3 | 3 | 72 3 | BB | 0,68079217 | 99,9%  | 99,9%  | 0,0% | 0     | 11,932 | 0        |
| BPAF   | t3_BB3 | 3 | 72 3 | BB | 0,4123404  | 100,0% | 100,0% | 0,0% | 0     | 11,932 | 0        |
| 24BPF  | t3_BB3 | 3 | 72 3 | BB | 1,11460323 | 99,9%  | 99,9%  | 0,0% | 0     | 11,932 | 0        |
| 44BPF  | t3_BB3 | 3 | 72 3 | BB | 1,11276928 | 99,9%  | 99,9%  | 0,0% | 0     | 11,932 | 0        |
| BPE    | t3_BB3 | 3 | 72 3 | BB | 0,26633738 | 100,0% | 100,0% | 0,0% | 0     | 11,932 | 0        |
| BPA    | t3_BB3 | 3 | 72 3 | BB | 0          | 100,0% | 100,0% | 0,0% | 0     | 11,932 | 0        |
| BPC    | t3_BB3 | 3 | 72 3 | BB | 0,16454667 | 100,0% | 100,0% | 0,0% | 0     | 11,932 | 0        |
| BPB    | t3_BB3 | 3 | 72 3 | BB | 0,04294423 | 100,0% | 100,0% | 0,0% | 0     | 11,932 | 0        |
| BP26DM | t3_BB3 | 3 | 72 3 | BB | 0,0733854  | 100,0% | 100,0% | 0,0% | 0     | 11,932 | 0        |
| BPC2   | t3_BB3 | 3 | 72 3 | BB | 0,14828269 | 100,0% | 100,0% | 0,0% | 0     | 11,932 | 0        |
| BPZ    | t3_BB3 | 3 | 72 3 | BB | 0,14721978 | 100,0% | 100,0% | 0,0% | 0     | 11,932 | 0        |
| BPS    | t3_BB3 | 3 | 72 3 | BB | 2,95026178 | 99,7%  | 99,7%  | 0,0% | 0     | 11,932 | 0        |
| BPAP   | t3_BB3 | 3 | 72 3 | BB | 0,2888648  | 100,0% | 100,0% | 0,0% | 0     | 11,932 | 0        |
| BPM    | t3_BB3 | 3 | 72 3 | BB | 0,02998668 | 100,0% | 100,0% | 0,0% | 0     | 11,932 | 0        |
| BPP    | t3_BB3 | 3 | 72 3 | BB | 0,64703412 | 99,9%  | 99,9%  | 0,0% | 0     | 11,932 | 0        |
| BPBP   | t3_BB3 | 3 | 72 3 | BB | 0,12640079 | 100,0% | 100,0% | 0,0% | 0     | 11,932 | 0        |
| BPPH   | t3_BB3 | 3 | 72 3 | BB | 0,13185722 | 100,0% | 100,0% | 0,0% | 0     | 11,932 | 0        |
| BPFL   | t3_BB3 | 3 | 72 3 | BB | 0,1542849  | 100,0% | 100,0% | 0,0% | 0     | 11,932 | 0        |
| 22BPF  | t3_BK1 | 3 | 72 1 | BK | 0,18478498 | 100,0% | 100,0% | 0,0% | 2,826 | 2,571  | 1,099183 |
| BPAF   | t3_BK1 | 3 | 72 1 | BK | 0,63042816 | 99,9%  | 99,9%  | 0,0% | 2,826 | 2,571  | 1,099183 |
| 24BPF  | t3_BK1 | 3 | 72 1 | BK | 0,8164058  | 99,9%  | 99,9%  | 0,0% | 2,826 | 2,571  | 1,099183 |
| 44BPF  | t3_BK1 | 3 | 72 1 | BK | 1,00715591 | 99,9%  | 99,9%  | 0,0% | 2,826 | 2,571  | 1,099183 |
| BPE    | t3_BK1 | 3 | 72 1 | BK | 0,46232739 | 100,0% | 100,0% | 0,0% | 2,826 | 2,571  | 1,099183 |
| BPA    | t3_BK1 | 3 | 72 1 | BK | 0          | 100,0% | 100,0% | 0,0% | 2,826 | 2,571  | 1,099183 |
| BPC    | t3_BK1 | 3 | 72 1 | BK | 0,05625042 | 100,0% | 100,0% | 0,0% | 2,826 | 2,571  | 1,099183 |
| BPB    | t3_BK1 | 3 | 72 1 | BK | 0,18000903 | 100,0% | 100,0% | 0,0% | 2,826 | 2,571  | 1,099183 |
| BP26DM | t3_BK1 | 3 | 72 1 | BK | 0,21224634 | 100,0% | 100,0% | 0,0% | 2,826 | 2,571  | 1,099183 |
| BPC2   | t3_BK1 | 3 | 72 1 | BK | 0,22761263 | 100,0% | 100,0% | 0,0% | 2,826 | 2,571  | 1,099183 |
| BPZ    | t3_BK1 | 3 | 72 1 | BK | 0,14598076 | 100,0% | 100,0% | 0,0% | 2,826 | 2,571  | 1,099183 |
| BPS    | t3_BK1 | 3 | 72 1 | BK | 9,11640715 | 99,1%  | 99,1%  | 0,0% | 2,826 | 2,571  | 1,099183 |
| BPAP   | t3_BK1 | 3 | 72 1 | BK | 0,24603842 | 100,0% | 100,0% | 0,0% | 2,826 | 2,571  | 1,099183 |
| BPM    | t3_BK1 | 3 | 72 1 | BK | 0,28699193 | 100,0% | 100,0% | 0,0% | 2,826 | 2,571  | 1,099183 |
| BPP    | t3_BK1 | 3 | 72 1 | BK | 0,75300528 | 99,9%  | 99,9%  | 0,0% | 2,826 | 2,571  | 1,099183 |
| BPBP   | t3_BK1 | 3 | 72 1 | BK | 0,40928471 | 100,0% | 100,0% | 0,0% | 2,826 | 2,571  | 1,099183 |
| BPPH   | t3_BK1 | 3 | 72 1 | BK | 0,1976808  | 100,0% | 100,0% | 0,0% | 2,826 | 2,571  | 1,099183 |
| BPFL   | t3_BK1 | 3 | 72 1 | BK | 0,78968323 | 99,9%  | 99,9%  | 0,0% | 2,826 | 2,571  | 1,099183 |
| 22BPF  | t3_BK2 | 3 | 72 2 | BK | 0,39033059 | 100,0% | 100,0% | 0,0% | 2,494 | 2,983  | 0,836071 |
| BPAF   | t3_BK2 | 3 | 72 2 | BK | 0,90859579 | 99,9%  | 99,9%  | 0,0% | 2,494 | 2,983  | 0,836071 |
| 24BPF  | t3_BK2 | 3 | 72 2 | BK | 0,56321411 | 99,9%  | 99,9%  | 0,0% | 2,494 | 2,983  | 0,836071 |
| 44BPF  | t3_BK2 | 3 | 72 2 | BK | 0,833263   | 99,9%  | 99,9%  | 0,0% | 2,494 | 2,983  | 0,836071 |
| BPE    | t3_BK2 | 3 | 72 2 | BK | 0,37469676 | 100,0% | 100,0% | 0,0% | 2,494 | 2,983  | 0,836071 |
| BPA    | t3_BK2 | 3 | 72 2 | BK | 0          | 100,0% | 100,0% | 0,0% | 2,494 | 2,983  | 0,836071 |
| BPC    | t3_BK2 | 3 | 72 2 | BK | 0,05827032 | 100,0% | 100,0% | 0,0% | 2,494 | 2,983  | 0,836071 |
| BPB    | t3_BK2 | 3 | 72 2 | BK | 0,23731168 | 100,0% | 100,0% | 0,0% | 2,494 | 2,983  | 0,836071 |
| BP26DM | t3_BK2 | 3 | 72 2 | BK | 2,56047783 | 99,7%  | 99,7%  | 0,0% | 2,494 | 2,983  | 0,836071 |
| BPC2   | t3_BK2 | 3 | 72 2 | BK | 0,48646526 | 100,0% | 100,0% | 0,0% | 2,494 | 2,983  | 0,836071 |
| BPZ    | t3_BK2 | 3 | 72 2 | BK | 0,28431943 | 100,0% | 100,0% | 0,0% | 2,494 | 2,983  | 0,836071 |
| BPS    | t3_BK2 | 3 | 72 2 | BK | 4,98292413 | 99,5%  | 99,5%  | 0,0% | 2,494 | 2,983  | 0,836071 |
| BPAP   | t3_BK2 | 3 | 72 2 | BK | 0,62056754 | 99,9%  | 99,9%  | 0,0% | 2,494 | 2,983  | 0,836071 |
| BPM    | t3_BK2 | 3 | 72 2 | BK | 0,01952841 | 100,0% | 100,0% | 0,0% | 2,494 | 2,983  | 0,836071 |
| BPP    | t3_BK2 | 3 | 72 2 | BK | 0,74301916 | 99,9%  | 99,9%  | 0,0% | 2,494 | 2,983  | 0,836071 |
| BPBP   | t3_BK2 | 3 | 72 2 | BK | 0,36686822 | 100,0% | 100,0% | 0,0% | 2,494 | 2,983  | 0,836071 |
| BPPH   | t3_BK2 | 3 | 72 2 | BK | 0,07215003 | 100,0% | 100,0% | 0,0% | 2,494 | 2,983  | 0,836071 |
| BPFL   | t3_BK2 | 3 | 72 2 | BK | 0,20709695 | 100,0% | 100,0% | 0,0% | 2,494 | 2,983  | 0,836071 |
| 22BPF  | t3_BK3 | 3 | 72 3 | BK | 0,99640941 | 99,9%  | 99,9%  | 0,0% | 2,273 | 2,894  | 0,785418 |
| BPAF   | t3_BK3 | 3 | 72 3 | BK | 0,74764507 | 99,9%  | 99,9%  | 0,0% | 2,273 | 2,894  | 0,785418 |

|        |        |   |      |    |            |        |        |      |       |        |          |
|--------|--------|---|------|----|------------|--------|--------|------|-------|--------|----------|
| 24BPF  | t3_BK3 | 3 | 72 3 | BK | 0,84402937 | 99,9%  | 99,9%  | 0,0% | 2,273 | 2,894  | 0,785418 |
| 44BPF  | t3_BK3 | 3 | 72 3 | BK | 0,44532534 | 100,0% | 100,0% | 0,0% | 2,273 | 2,894  | 0,785418 |
| BPE    | t3_BK3 | 3 | 72 3 | BK | 0,39797601 | 100,0% | 100,0% | 0,0% | 2,273 | 2,894  | 0,785418 |
| BPA    | t3_BK3 | 3 | 72 3 | BK | 0          | 100,0% | 100,0% | 0,0% | 2,273 | 2,894  | 0,785418 |
| BPC    | t3_BK3 | 3 | 72 3 | BK | 0,17410489 | 100,0% | 100,0% | 0,0% | 2,273 | 2,894  | 0,785418 |
| BPB    | t3_BK3 | 3 | 72 3 | BK | 0,34551312 | 100,0% | 100,0% | 0,0% | 2,273 | 2,894  | 0,785418 |
| BP26DM | t3_BK3 | 3 | 72 3 | BK | 0,27118021 | 100,0% | 100,0% | 0,0% | 2,273 | 2,894  | 0,785418 |
| BPC2   | t3_BK3 | 3 | 72 3 | BK | 0,2        | 100,0% | 100,0% | 0,0% | 2,273 | 2,894  | 0,785418 |
| BPZ    | t3_BK3 | 3 | 72 3 | BK | 0,36147025 | 100,0% | 100,0% | 0,0% | 2,273 | 2,894  | 0,785418 |
| BPS    | t3_BK3 | 3 | 72 3 | BK | 3,36223378 | 99,7%  | 99,7%  | 0,0% | 2,273 | 2,894  | 0,785418 |
| BPAP   | t3_BK3 | 3 | 72 3 | BK | 0,32702747 | 100,0% | 100,0% | 0,0% | 2,273 | 2,894  | 0,785418 |
| BPM    | t3_BK3 | 3 | 72 3 | BK | 0,08132636 | 100,0% | 100,0% | 0,0% | 2,273 | 2,894  | 0,785418 |
| BPP    | t3_BK3 | 3 | 72 3 | BK | 0,60757407 | 99,9%  | 99,9%  | 0,0% | 2,273 | 2,894  | 0,785418 |
| BPBP   | t3_BK3 | 3 | 72 3 | BK | 0,14649582 | 100,0% | 100,0% | 0,0% | 2,273 | 2,894  | 0,785418 |
| BPBH   | t3_BK3 | 3 | 72 3 | BK | 0,14981052 | 100,0% | 100,0% | 0,0% | 2,273 | 2,894  | 0,785418 |
| BPFL   | t3_BK3 | 3 | 72 3 | BK | 0,44821795 | 100,0% | 100,0% | 0,0% | 2,273 | 2,894  | 0,785418 |
| 22BPF  | t3_EA1 | 3 | 72 1 | EA | 917,430344 | 8,3%   | 8,3%   | 0,0% | 2,371 | 0,102  | 23,2451  |
| BPAF   | t3_EA1 | 3 | 72 1 | EA | 872,390918 | 12,8%  | 12,8%  | 0,0% | 2,371 | 0,102  | 23,2451  |
| 24BPF  | t3_EA1 | 3 | 72 1 | EA | 763,903122 | 23,6%  | 23,6%  | 0,0% | 2,371 | 0,102  | 23,2451  |
| 44BPF  | t3_EA1 | 3 | 72 1 | EA | 791,680344 | 20,8%  | 20,8%  | 0,0% | 2,371 | 0,102  | 23,2451  |
| BPE    | t3_EA1 | 3 | 72 1 | EA | 804,902308 | 19,5%  | 19,5%  | 0,0% | 2,371 | 0,102  | 23,2451  |
| BPA    | t3_EA1 | 3 | 72 1 | EA | 807,990659 | 19,2%  | 19,2%  | 0,0% | 2,371 | 0,102  | 23,2451  |
| BPC    | t3_EA1 | 3 | 72 1 | EA | 750,443697 | 25,0%  | 25,0%  | 0,0% | 2,371 | 0,102  | 23,2451  |
| BPB    | t3_EA1 | 3 | 72 1 | EA | 769,549394 | 23,0%  | 23,0%  | 0,0% | 2,371 | 0,102  | 23,2451  |
| BP26DM | t3_EA1 | 3 | 72 1 | EA | 668,642814 | 33,1%  | 33,1%  | 0,0% | 2,371 | 0,102  | 23,2451  |
| BPC2   | t3_EA1 | 3 | 72 1 | EA | 271,936024 | 72,8%  | 72,8%  | 0,0% | 2,371 | 0,102  | 23,2451  |
| BPZ    | t3_EA1 | 3 | 72 1 | EA | 742,949901 | 25,7%  | 25,7%  | 0,0% | 2,371 | 0,102  | 23,2451  |
| BPS    | t3_EA1 | 3 | 72 1 | EA | 728,247618 | 27,2%  | 27,2%  | 0,0% | 2,371 | 0,102  | 23,2451  |
| BPAP   | t3_EA1 | 3 | 72 1 | EA | 856,800897 | 14,3%  | 14,3%  | 0,0% | 2,371 | 0,102  | 23,2451  |
| BPM    | t3_EA1 | 3 | 72 1 | EA | 336,173931 | 66,4%  | 66,4%  | 0,0% | 2,371 | 0,102  | 23,2451  |
| BPP    | t3_EA1 | 3 | 72 1 | EA | 207,049254 | 79,3%  | 79,3%  | 0,0% | 2,371 | 0,102  | 23,2451  |
| BPBP   | t3_EA1 | 3 | 72 1 | EA | 428,651715 | 57,1%  | 57,1%  | 0,0% | 2,371 | 0,102  | 23,2451  |
| BPBH   | t3_EA1 | 3 | 72 1 | EA | 41,642861  | 95,8%  | 95,8%  | 0,0% | 2,371 | 0,102  | 23,2451  |
| BPFL   | t3_EA1 | 3 | 72 1 | EA | 420,83236  | 57,9%  | 57,9%  | 0,0% | 2,371 | 0,102  | 23,2451  |
| 22BPF  | t3_EA2 | 3 | 72 2 | EA | 853,360333 | 14,7%  | 14,7%  | 0,0% | 1,563 | 0,223  | 7,008969 |
| BPAF   | t3_EA2 | 3 | 72 2 | EA | 901,040658 | 9,9%   | 9,9%   | 0,0% | 1,563 | 0,223  | 7,008969 |
| 24BPF  | t3_EA2 | 3 | 72 2 | EA | 934,213907 | 6,6%   | 6,6%   | 0,0% | 1,563 | 0,223  | 7,008969 |
| 44BPF  | t3_EA2 | 3 | 72 2 | EA | 729,811613 | 27,0%  | 27,0%  | 0,0% | 1,563 | 0,223  | 7,008969 |
| BPE    | t3_EA2 | 3 | 72 2 | EA | 766,564172 | 23,3%  | 23,3%  | 0,0% | 1,563 | 0,223  | 7,008969 |
| BPA    | t3_EA2 | 3 | 72 2 | EA | 718,38545  | 28,2%  | 28,2%  | 0,0% | 1,563 | 0,223  | 7,008969 |
| BPC    | t3_EA2 | 3 | 72 2 | EA | 682,508862 | 31,7%  | 31,7%  | 0,0% | 1,563 | 0,223  | 7,008969 |
| BPB    | t3_EA2 | 3 | 72 2 | EA | 739,944757 | 26,0%  | 26,0%  | 0,0% | 1,563 | 0,223  | 7,008969 |
| BP26DM | t3_EA2 | 3 | 72 2 | EA | 533,90568  | 46,6%  | 46,6%  | 0,0% | 1,563 | 0,223  | 7,008969 |
| BPC2   | t3_EA2 | 3 | 72 2 | EA | 46,1733775 | 95,4%  | 95,4%  | 0,0% | 1,563 | 0,223  | 7,008969 |
| BPZ    | t3_EA2 | 3 | 72 2 | EA | 687,897809 | 31,2%  | 31,2%  | 0,0% | 1,563 | 0,223  | 7,008969 |
| BPS    | t3_EA2 | 3 | 72 2 | EA | 707,749439 | 29,2%  | 29,2%  | 0,0% | 1,563 | 0,223  | 7,008969 |
| BPAP   | t3_EA2 | 3 | 72 2 | EA | 666,333007 | 33,4%  | 33,4%  | 0,0% | 1,563 | 0,223  | 7,008969 |
| BPM    | t3_EA2 | 3 | 72 2 | EA | 479,633616 | 52,0%  | 52,0%  | 0,0% | 1,563 | 0,223  | 7,008969 |
| BPP    | t3_EA2 | 3 | 72 2 | EA | 369,461846 | 63,1%  | 63,1%  | 0,0% | 1,563 | 0,223  | 7,008969 |
| BPBP   | t3_EA2 | 3 | 72 2 | EA | 645,978089 | 35,4%  | 35,4%  | 0,0% | 1,563 | 0,223  | 7,008969 |
| BPBH   | t3_EA2 | 3 | 72 2 | EA | 77,3075063 | 92,3%  | 92,3%  | 0,0% | 1,563 | 0,223  | 7,008969 |
| BPFL   | t3_EA2 | 3 | 72 2 | EA | 639,494833 | 36,1%  | 36,1%  | 0,0% | 1,563 | 0,223  | 7,008969 |
| 22BPF  | t3_EA3 | 3 | 72 3 | EA | 872,450896 | 12,8%  | 12,8%  | 0,0% | 1,631 | 0,295  | 5,528814 |
| BPAF   | t3_EA3 | 3 | 72 3 | EA | 811,859942 | 18,8%  | 18,8%  | 0,0% | 1,631 | 0,295  | 5,528814 |
| 24BPF  | t3_EA3 | 3 | 72 3 | EA | 832,373708 | 16,8%  | 16,8%  | 0,0% | 1,631 | 0,295  | 5,528814 |
| 44BPF  | t3_EA3 | 3 | 72 3 | EA | 836,314846 | 16,4%  | 16,4%  | 0,0% | 1,631 | 0,295  | 5,528814 |
| BPE    | t3_EA3 | 3 | 72 3 | EA | 833,840827 | 16,6%  | 16,6%  | 0,0% | 1,631 | 0,295  | 5,528814 |
| BPA    | t3_EA3 | 3 | 72 3 | EA | 816,170572 | 18,4%  | 18,4%  | 0,0% | 1,631 | 0,295  | 5,528814 |
| BPC    | t3_EA3 | 3 | 72 3 | EA | 759,841597 | 24,0%  | 24,0%  | 0,0% | 1,631 | 0,295  | 5,528814 |
| BPB    | t3_EA3 | 3 | 72 3 | EA | 831,28958  | 16,9%  | 16,9%  | 0,0% | 1,631 | 0,295  | 5,528814 |
| BP26DM | t3_EA3 | 3 | 72 3 | EA | 601,224896 | 39,9%  | 39,9%  | 0,0% | 1,631 | 0,295  | 5,528814 |
| BPC2   | t3_EA3 | 3 | 72 3 | EA | 26,2056745 | 97,4%  | 97,4%  | 0,0% | 1,631 | 0,295  | 5,528814 |
| BPZ    | t3_EA3 | 3 | 72 3 | EA | 784,475987 | 21,6%  | 21,6%  | 0,0% | 1,631 | 0,295  | 5,528814 |
| BPS    | t3_EA3 | 3 | 72 3 | EA | 776,68558  | 22,3%  | 22,3%  | 0,0% | 1,631 | 0,295  | 5,528814 |
| BPAP   | t3_EA3 | 3 | 72 3 | EA | 829,596988 | 17,0%  | 17,0%  | 0,0% | 1,631 | 0,295  | 5,528814 |
| BPM    | t3_EA3 | 3 | 72 3 | EA | 491,845646 | 50,8%  | 50,8%  | 0,0% | 1,631 | 0,295  | 5,528814 |
| BPP    | t3_EA3 | 3 | 72 3 | EA | 350,109343 | 65,0%  | 65,0%  | 0,0% | 1,631 | 0,295  | 5,528814 |
| BPBP   | t3_EA3 | 3 | 72 3 | EA | 570,867435 | 42,9%  | 42,9%  | 0,0% | 1,631 | 0,295  | 5,528814 |
| BPBH   | t3_EA3 | 3 | 72 3 | EA | 63,0843245 | 93,7%  | 93,7%  | 0,0% | 1,631 | 0,295  | 5,528814 |
| BPFL   | t3_EA3 | 3 | 72 3 | EA | 588,612281 | 41,1%  | 41,1%  | 0,0% | 1,631 | 0,295  | 5,528814 |
| 22BPF  | t3_EB1 | 3 | 72 1 | EB | 822,034437 | 17,8%  | 17,8%  | 0,0% | 0     | 10,592 | 0        |
| BPAF   | t3_EB1 | 3 | 72 1 | EB | 717,768498 | 28,2%  | 28,2%  | 0,0% | 0     | 10,592 | 0        |
| 24BPF  | t3_EB1 | 3 | 72 1 | EB | 767,933325 | 23,2%  | 23,2%  | 0,0% | 0     | 10,592 | 0        |
| 44BPF  | t3_EB1 | 3 | 72 1 | EB | 817,061631 | 18,3%  | 18,3%  | 0,0% | 0     | 10,592 | 0        |
| BPE    | t3_EB1 | 3 | 72 1 | EB | 768,574225 | 23,1%  | 23,1%  | 0,0% | 0     | 10,592 | 0        |
| BPA    | t3_EB1 | 3 | 72 1 | EB | 679,459581 | 32,1%  | 32,1%  | 0,0% | 0     | 10,592 | 0        |
| BPC    | t3_EB1 | 3 | 72 1 | EB | 752,481665 | 24,8%  | 24,8%  | 0,0% | 0     | 10,592 | 0        |
| BPB    | t3_EB1 | 3 | 72 1 | EB | 747,972661 | 25,2%  | 25,2%  | 0,0% | 0     | 10,592 | 0        |
| BP26DM | t3_EB1 | 3 | 72 1 | EB | 706,581946 | 29,3%  | 29,3%  | 0,0% | 0     | 10,592 | 0        |
| BPC2   | t3_EB1 | 3 | 72 1 | EB | 626,313684 | 37,4%  | 37,4%  | 0,0% | 0     | 10,592 | 0        |
| BPZ    | t3_EB1 | 3 | 72 1 | EB | 704,674357 | 29,5%  | 29,5%  | 0,0% | 0     | 10,592 | 0        |
| BPS    | t3_EB1 | 3 | 72 1 | EB | 784,992146 | 21,5%  | 21,5%  | 0,0% | 0     | 10,592 | 0        |
| BPAP   | t3_EB1 | 3 | 72 1 | EB | 664,765744 | 33,5%  | 33,5%  | 0,0% | 0     | 10,592 | 0        |
| BPM    | t3_EB1 | 3 | 72 1 | EB | 243,212645 | 75,7%  | 75,7%  | 0,0% | 0     | 10,592 | 0        |
| BPP    | t3_EB1 | 3 | 72 1 | EB | 145,405157 | 85,5%  | 85,5%  | 0,0% | 0     | 10,592 | 0        |
| BPBP   | t3_EB1 | 3 | 72 1 | EB | 376,892906 | 62,3%  | 62,3%  | 0,0% | 0     | 10,592 | 0        |

|        |        |   |    |   |    |            |       |       |      |       |        |          |
|--------|--------|---|----|---|----|------------|-------|-------|------|-------|--------|----------|
| BPPH   | t3_EB1 | 3 | 72 | 1 | EB | 61,4135754 | 93,9% | 93,9% | 0,0% | 0     | 10,592 | 0        |
| BPFL   | t3_EB1 | 3 | 72 | 1 | EB | 435,326293 | 56,5% | 56,5% | 0,0% | 0     | 10,592 | 0        |
| 22BPF  | t3_EB2 | 3 | 72 | 2 | EB | 919,797753 | 8,0%  | 8,0%  | 0,0% | 0     | 9,905  | 0        |
| BPAF   | t3_EB2 | 3 | 72 | 2 | EB | 792,718214 | 20,7% | 20,7% | 0,0% | 0     | 9,905  | 0        |
| 24BPF  | t3_EB2 | 3 | 72 | 2 | EB | 873,948784 | 12,6% | 12,6% | 0,0% | 0     | 9,905  | 0        |
| 44BPF  | t3_EB2 | 3 | 72 | 2 | EB | 776,292698 | 22,4% | 22,4% | 0,0% | 0     | 9,905  | 0        |
| BPE    | t3_EB2 | 3 | 72 | 2 | EB | 723,213697 | 27,7% | 27,7% | 0,0% | 0     | 9,905  | 0        |
| BPA    | t3_EB2 | 3 | 72 | 2 | EB | 696,948275 | 30,3% | 30,3% | 0,0% | 0     | 9,905  | 0        |
| BPC    | t3_EB2 | 3 | 72 | 2 | EB | 781,942532 | 21,8% | 21,8% | 0,0% | 0     | 9,905  | 0        |
| BPB    | t3_EB2 | 3 | 72 | 2 | EB | 766,551807 | 23,3% | 23,3% | 0,0% | 0     | 9,905  | 0        |
| BP26DM | t3_EB2 | 3 | 72 | 2 | EB | 780,058712 | 22,0% | 22,0% | 0,0% | 0     | 9,905  | 0        |
| BPC2   | t3_EB2 | 3 | 72 | 2 | EB | 684,709551 | 31,5% | 31,5% | 0,0% | 0     | 9,905  | 0        |
| BPZ    | t3_EB2 | 3 | 72 | 2 | EB | 755,478714 | 24,5% | 24,5% | 0,0% | 0     | 9,905  | 0        |
| BPS    | t3_EB2 | 3 | 72 | 2 | EB | 786,438591 | 21,4% | 21,4% | 0,0% | 0     | 9,905  | 0        |
| BPAP   | t3_EB2 | 3 | 72 | 2 | EB | 747,482893 | 25,3% | 25,3% | 0,0% | 0     | 9,905  | 0        |
| BPM    | t3_EB2 | 3 | 72 | 2 | EB | 274,937731 | 72,5% | 72,5% | 0,0% | 0     | 9,905  | 0        |
| BPP    | t3_EB2 | 3 | 72 | 2 | EB | 172,226563 | 82,8% | 82,8% | 0,0% | 0     | 9,905  | 0        |
| BPBP   | t3_EB2 | 3 | 72 | 2 | EB | 408,364035 | 59,2% | 59,2% | 0,0% | 0     | 9,905  | 0        |
| BPPH   | t3_EB2 | 3 | 72 | 2 | EB | 82,1403048 | 91,8% | 91,8% | 0,0% | 0     | 9,905  | 0        |
| BPFL   | t3_EB2 | 3 | 72 | 2 | EB | 497,534413 | 50,2% | 50,2% | 0,0% | 0     | 9,905  | 0        |
| 22BPF  | t3_EB3 | 3 | 72 | 3 | EB | 728,297697 | 27,2% | 27,2% | 0,0% | 0     | 10,454 | 0        |
| BPAF   | t3_EB3 | 3 | 72 | 3 | EB | 646,471307 | 35,4% | 35,4% | 0,0% | 0     | 10,454 | 0        |
| 24BPF  | t3_EB3 | 3 | 72 | 3 | EB | 696,976363 | 30,3% | 30,3% | 0,0% | 0     | 10,454 | 0        |
| 44BPF  | t3_EB3 | 3 | 72 | 3 | EB | 757,630182 | 24,2% | 24,2% | 0,0% | 0     | 10,454 | 0        |
| BPE    | t3_EB3 | 3 | 72 | 3 | EB | 626,261482 | 37,4% | 37,4% | 0,0% | 0     | 10,454 | 0        |
| BPA    | t3_EB3 | 3 | 72 | 3 | EB | 681,808131 | 31,8% | 31,8% | 0,0% | 0     | 10,454 | 0        |
| BPC    | t3_EB3 | 3 | 72 | 3 | EB | 707,644063 | 29,2% | 29,2% | 0,0% | 0     | 10,454 | 0        |
| BPB    | t3_EB3 | 3 | 72 | 3 | EB | 706,293356 | 29,4% | 29,4% | 0,0% | 0     | 10,454 | 0        |
| BP26DM | t3_EB3 | 3 | 72 | 3 | EB | 688,595097 | 31,1% | 31,1% | 0,0% | 0     | 10,454 | 0        |
| BPC2   | t3_EB3 | 3 | 72 | 3 | EB | 608,044327 | 39,2% | 39,2% | 0,0% | 0     | 10,454 | 0        |
| BPZ    | t3_EB3 | 3 | 72 | 3 | EB | 687,362994 | 31,3% | 31,3% | 0,0% | 0     | 10,454 | 0        |
| BPS    | t3_EB3 | 3 | 72 | 3 | EB | 758,953125 | 24,1% | 24,1% | 0,0% | 0     | 10,454 | 0        |
| BPAP   | t3_EB3 | 3 | 72 | 3 | EB | 661,204511 | 33,9% | 33,9% | 0,0% | 0     | 10,454 | 0        |
| BPM    | t3_EB3 | 3 | 72 | 3 | EB | 229,566203 | 77,0% | 77,0% | 0,0% | 0     | 10,454 | 0        |
| BPP    | t3_EB3 | 3 | 72 | 3 | EB | 139,759335 | 86,0% | 86,0% | 0,0% | 0     | 10,454 | 0        |
| BPBP   | t3_EB3 | 3 | 72 | 3 | EB | 346,843483 | 65,3% | 65,3% | 0,0% | 0     | 10,454 | 0        |
| BPPH   | t3_EB3 | 3 | 72 | 3 | EB | 62,9458649 | 93,7% | 93,7% | 0,0% | 0     | 10,454 | 0        |
| BPFL   | t3_EB3 | 3 | 72 | 3 | EB | 409,814547 | 59,0% | 59,0% | 0,0% | 0     | 10,454 | 0        |
| 22BPF  | t3_EK1 | 3 | 72 | 1 | EK | 723,159149 | 27,7% | 27,7% | 0,0% | 3,236 | 3,557  | 0,909755 |
| BPAF   | t3_EK1 | 3 | 72 | 1 | EK | 725,416821 | 27,5% | 27,5% | 0,0% | 3,236 | 3,557  | 0,909755 |
| 24BPF  | t3_EK1 | 3 | 72 | 1 | EK | 677,754366 | 32,2% | 32,2% | 0,0% | 3,236 | 3,557  | 0,909755 |
| 44BPF  | t3_EK1 | 3 | 72 | 1 | EK | 720,027959 | 28,0% | 28,0% | 0,0% | 3,236 | 3,557  | 0,909755 |
| BPE    | t3_EK1 | 3 | 72 | 1 | EK | 720,560403 | 27,9% | 27,9% | 0,0% | 3,236 | 3,557  | 0,909755 |
| BPA    | t3_EK1 | 3 | 72 | 1 | EK | 700,941465 | 29,9% | 29,9% | 0,0% | 3,236 | 3,557  | 0,909755 |
| BPC    | t3_EK1 | 3 | 72 | 1 | EK | 609,631633 | 39,0% | 39,0% | 0,0% | 3,236 | 3,557  | 0,909755 |
| BPB    | t3_EK1 | 3 | 72 | 1 | EK | 716,047984 | 28,4% | 28,4% | 0,0% | 3,236 | 3,557  | 0,909755 |
| BP26DM | t3_EK1 | 3 | 72 | 1 | EK | 395,27028  | 60,5% | 60,5% | 0,0% | 3,236 | 3,557  | 0,909755 |
| BPC2   | t3_EK1 | 3 | 72 | 1 | EK | 25,159482  | 97,5% | 97,5% | 0,0% | 3,236 | 3,557  | 0,909755 |
| BPZ    | t3_EK1 | 3 | 72 | 1 | EK | 678,713064 | 32,1% | 32,1% | 0,0% | 3,236 | 3,557  | 0,909755 |
| BPS    | t3_EK1 | 3 | 72 | 1 | EK | 708,00846  | 29,2% | 29,2% | 0,0% | 3,236 | 3,557  | 0,909755 |
| BPAP   | t3_EK1 | 3 | 72 | 1 | EK | 702,814273 | 29,7% | 29,7% | 0,0% | 3,236 | 3,557  | 0,909755 |
| BPM    | t3_EK1 | 3 | 72 | 1 | EK | 377,926615 | 62,2% | 62,2% | 0,0% | 3,236 | 3,557  | 0,909755 |
| BPP    | t3_EK1 | 3 | 72 | 1 | EK | 274,435032 | 72,6% | 72,6% | 0,0% | 3,236 | 3,557  | 0,909755 |
| BPBP   | t3_EK1 | 3 | 72 | 1 | EK | 486,507935 | 51,3% | 51,3% | 0,0% | 3,236 | 3,557  | 0,909755 |
| BPPH   | t3_EK1 | 3 | 72 | 1 | EK | 54,7032146 | 94,5% | 94,5% | 0,0% | 3,236 | 3,557  | 0,909755 |
| BPFL   | t3_EK1 | 3 | 72 | 1 | EK | 492,343417 | 50,8% | 50,8% | 0,0% | 3,236 | 3,557  | 0,909755 |
| 22BPF  | t3_EK2 | 3 | 72 | 2 | EK | 792,821184 | 20,7% | 20,7% | 0,0% | 2,492 | 4,236  | 0,588291 |
| BPAF   | t3_EK2 | 3 | 72 | 2 | EK | 802,152107 | 19,8% | 19,8% | 0,0% | 2,492 | 4,236  | 0,588291 |
| 24BPF  | t3_EK2 | 3 | 72 | 2 | EK | 746,428722 | 25,4% | 25,4% | 0,0% | 2,492 | 4,236  | 0,588291 |
| 44BPF  | t3_EK2 | 3 | 72 | 2 | EK | 765,05423  | 23,5% | 23,5% | 0,0% | 2,492 | 4,236  | 0,588291 |
| BPE    | t3_EK2 | 3 | 72 | 2 | EK | 752,591383 | 24,7% | 24,7% | 0,0% | 2,492 | 4,236  | 0,588291 |
| BPA    | t3_EK2 | 3 | 72 | 2 | EK | 948,546312 | 5,1%  | 5,1%  | 0,0% | 2,492 | 4,236  | 0,588291 |
| BPC    | t3_EK2 | 3 | 72 | 2 | EK | 688,654534 | 31,1% | 31,1% | 0,0% | 2,492 | 4,236  | 0,588291 |
| BPB    | t3_EK2 | 3 | 72 | 2 | EK | 799,995266 | 20,0% | 20,0% | 0,0% | 2,492 | 4,236  | 0,588291 |
| BP26DM | t3_EK2 | 3 | 72 | 2 | EK | 400,043679 | 60,0% | 60,0% | 0,0% | 2,492 | 4,236  | 0,588291 |
| BPC2   | t3_EK2 | 3 | 72 | 2 | EK | 67,7579384 | 93,2% | 93,2% | 0,0% | 2,492 | 4,236  | 0,588291 |
| BPZ    | t3_EK2 | 3 | 72 | 2 | EK | 760,832893 | 23,9% | 23,9% | 0,0% | 2,492 | 4,236  | 0,588291 |
| BPS    | t3_EK2 | 3 | 72 | 2 | EK | 806,45868  | 19,4% | 19,4% | 0,0% | 2,492 | 4,236  | 0,588291 |
| BPAP   | t3_EK2 | 3 | 72 | 2 | EK | 788,028886 | 21,2% | 21,2% | 0,0% | 2,492 | 4,236  | 0,588291 |
| BPM    | t3_EK2 | 3 | 72 | 2 | EK | 387,413073 | 61,3% | 61,3% | 0,0% | 2,492 | 4,236  | 0,588291 |
| BPP    | t3_EK2 | 3 | 72 | 2 | EK | 293,018494 | 70,7% | 70,7% | 0,0% | 2,492 | 4,236  | 0,588291 |
| BPBP   | t3_EK2 | 3 | 72 | 2 | EK | 524,866188 | 47,5% | 47,5% | 0,0% | 2,492 | 4,236  | 0,588291 |
| BPPH   | t3_EK2 | 3 | 72 | 2 | EK | 57,3170789 | 94,3% | 94,3% | 0,0% | 2,492 | 4,236  | 0,588291 |
| BPFL   | t3_EK2 | 3 | 72 | 2 | EK | 573,844541 | 42,6% | 42,6% | 0,0% | 2,492 | 4,236  | 0,588291 |
| 22BPF  | t3_EK3 | 3 | 72 | 3 | EK | 818,630283 | 18,1% | 18,1% | 0,0% | 2,73  | 2,888  | 0,945291 |
| BPAF   | t3_EK3 | 3 | 72 | 3 | EK | 797,414524 | 20,3% | 20,3% | 0,0% | 2,73  | 2,888  | 0,945291 |
| 24BPF  | t3_EK3 | 3 | 72 | 3 | EK | 772,638044 | 22,7% | 22,7% | 0,0% | 2,73  | 2,888  | 0,945291 |
| 44BPF  | t3_EK3 | 3 | 72 | 3 | EK | 778,27137  | 22,2% | 22,2% | 0,0% | 2,73  | 2,888  | 0,945291 |
| BPE    | t3_EK3 | 3 | 72 | 3 | EK | 787,331651 | 21,3% | 21,3% | 0,0% | 2,73  | 2,888  | 0,945291 |
| BPA    | t3_EK3 | 3 | 72 | 3 | EK | 775,815308 | 22,4% | 22,4% | 0,0% | 2,73  | 2,888  | 0,945291 |
| BPC    | t3_EK3 | 3 | 72 | 3 | EK | 641,519242 | 35,8% | 35,8% | 0,0% | 2,73  | 2,888  | 0,945291 |
| BPB    | t3_EK3 | 3 | 72 | 3 | EK | 758,263129 | 24,2% | 24,2% | 0,0% | 2,73  | 2,888  | 0,945291 |
| BP26DM | t3_EK3 | 3 | 72 | 3 | EK | 363,230042 | 63,7% | 63,7% | 0,0% | 2,73  | 2,888  | 0,945291 |
| BPC2   | t3_EK3 | 3 | 72 | 3 | EK | 70,1399692 | 93,0% | 93,0% | 0,0% | 2,73  | 2,888  | 0,945291 |
| BPZ    | t3_EK3 | 3 | 72 | 3 | EK | 686,596413 | 31,3% | 31,3% | 0,0% | 2,73  | 2,888  | 0,945291 |
| BPS    | t3_EK3 | 3 | 72 | 3 | EK | 790,243754 | 21,0% | 21,0% | 0,0% | 2,73  | 2,888  | 0,945291 |

|        |         |   |     |   |     |            |          |       |       |        |         |         |          |
|--------|---------|---|-----|---|-----|------------|----------|-------|-------|--------|---------|---------|----------|
| BPAP   | t3_EK3  | 3 | 72  | 3 | EK  | 706,170035 |          | 29,4% | 29,4% | 0,0%   | 2,73    | 2,888   | 0,945291 |
| BPM    | t3_EK3  | 3 | 72  | 3 | EK  | 347,427922 |          | 65,3% | 65,3% | 0,0%   | 2,73    | 2,888   | 0,945291 |
| BPP    | t3_EK3  | 3 | 72  | 3 | EK  | 258,290923 |          | 74,2% | 74,2% | 0,0%   | 2,73    | 2,888   | 0,945291 |
| BPBP   | t3_EK3  | 3 | 72  | 3 | EK  | 494,539416 |          | 50,5% | 50,5% | 0,0%   | 2,73    | 2,888   | 0,945291 |
| BPPH   | t3_EK3  | 3 | 72  | 3 | EK  | 47,4413482 |          | 95,3% | 95,3% | 0,0%   | 2,73    | 2,888   | 0,945291 |
| BPFL   | t3_EK3  | 3 | 72  | 3 | EK  | 523,828406 |          | 47,6% | 47,6% | 0,0%   | 2,73    | 2,888   | 0,945291 |
| 22BPF  | t7_ABS1 | 7 | 168 | 1 | ABS | 834,324981 | 0,512223 | 16,6% | 16,5% | -0,1%  | 0       | 0,01832 | 0        |
| 24BPF  | t7_ABS1 | 7 | 168 | 1 | ABS | 786,623863 | 0,522944 | 21,3% | 21,3% | -0,1%  | 0       | 0,01832 | 0        |
| 44BPF  | t7_ABS1 | 7 | 168 | 1 | ABS | 864,461535 | 0,749699 | 13,6% | 13,5% | -0,1%  | 0       | 0,01832 | 0        |
| BP26DM | t7_ABS1 | 7 | 168 | 1 | ABS | 580,383857 | 4,816341 | 42,0% | 41,5% | -0,5%  | 0       | 0,01832 | 0        |
| BPA    | t7_ABS1 | 7 | 168 | 1 | ABS | 817,822894 | 0        | 18,2% | 18,2% | 0,0%   | 0       | 0,01832 | 0        |
| BPAF   | t7_ABS1 | 7 | 168 | 1 | ABS | 739,203566 | 33,86559 | 26,1% | 22,7% | -3,4%  | 0       | 0,01832 | 0        |
| BPAP   | t7_ABS1 | 7 | 168 | 1 | ABS | 816,867794 | 18,38491 | 18,3% | 16,5% | -1,8%  | 0       | 0,01832 | 0        |
| BPB    | t7_ABS1 | 7 | 168 | 1 | ABS | 855,904598 | 4,848038 | 14,4% | 13,9% | -0,5%  | 0       | 0,01832 | 0        |
| BPBP   | t7_ABS1 | 7 | 168 | 1 | ABS | 473,062447 | 191,7661 | 52,7% | 33,5% | -19,2% | 0       | 0,01832 | 0        |
| BPC    | t7_ABS1 | 7 | 168 | 1 | ABS | 746,934693 | 5,679425 | 25,3% | 24,7% | -0,6%  | 0       | 0,01832 | 0        |
| BPC2   | t7_ABS1 | 7 | 168 | 1 | ABS | 702,291707 | 16,50892 | 29,8% | 28,1% | -1,7%  | 0       | 0,01832 | 0        |
| BPE    | t7_ABS1 | 7 | 168 | 1 | ABS | 795,04082  | 0,938022 | 20,5% | 20,4% | -0,1%  | 0       | 0,01832 | 0        |
| BPFL   | t7_ABS1 | 7 | 168 | 1 | ABS | 403,80521  | 131,9766 | 59,6% | 46,4% | -13,2% | 0       | 0,01832 | 0        |
| BPM    | t7_ABS1 | 7 | 168 | 1 | ABS | 424,745031 | 158,934  | 57,5% | 41,6% | -15,9% | 0       | 0,01832 | 0        |
| BPP    | t7_ABS1 | 7 | 168 | 1 | ABS | 301,034611 | 197,1976 | 69,9% | 50,2% | -19,7% | 0       | 0,01832 | 0        |
| BPPH   | t7_ABS1 | 7 | 168 | 1 | ABS | 168,739529 | 110,4487 | 83,1% | 72,1% | -11,0% | 0       | 0,01832 | 0        |
| BPS    | t7_ABS1 | 7 | 168 | 1 | ABS | 803,322077 | 0,059203 | 19,7% | 19,7% | 0,0%   | 0       | 0,01832 | 0        |
| BPZ    | t7_ABS1 | 7 | 168 | 1 | ABS | 793,095054 | 16,69381 | 20,7% | 19,0% | -1,7%  | 0       | 0,01832 | 0        |
| 22BPF  | t7_ABS2 | 7 | 168 | 2 | ABS | 868,104205 | 0,863875 | 13,2% | 13,1% | -0,1%  | 0       | 0,04852 | 0        |
| 24BPF  | t7_ABS2 | 7 | 168 | 2 | ABS | 827,711161 | 0,739048 | 17,2% | 17,2% | -0,1%  | 0       | 0,04852 | 0        |
| 44BPF  | t7_ABS2 | 7 | 168 | 2 | ABS | 828,941212 | 0,417532 | 17,1% | 17,1% | 0,0%   | 0       | 0,04852 | 0        |
| BP26DM | t7_ABS2 | 7 | 168 | 2 | ABS | 646,071645 | 8,579217 | 35,4% | 34,5% | -0,9%  | 0       | 0,04852 | 0        |
| BPA    | t7_ABS2 | 7 | 168 | 2 | ABS | 762,766474 | 0        | 23,7% | 23,7% | 0,0%   | 0       | 0,04852 | 0        |
| BPAF   | t7_ABS2 | 7 | 168 | 2 | ABS | 829,815278 | 46,11661 | 17,0% | 12,4% | -4,6%  | 0       | 0,04852 | 0        |
| BPAP   | t7_ABS2 | 7 | 168 | 2 | ABS | 818,477218 | 20,44844 | 18,2% | 16,1% | -2,0%  | 0       | 0,04852 | 0        |
| BPB    | t7_ABS2 | 7 | 168 | 2 | ABS | 811,687659 | 4,373567 | 18,8% | 18,4% | -0,4%  | 0       | 0,04852 | 0        |
| BPBP   | t7_ABS2 | 7 | 168 | 2 | ABS | 411,12426  | 195,9609 | 58,9% | 39,3% | -19,6% | 0       | 0,04852 | 0        |
| BPC    | t7_ABS2 | 7 | 168 | 2 | ABS | 752,491795 | 6,792995 | 24,8% | 24,1% | -0,7%  | 0       | 0,04852 | 0        |
| BPC2   | t7_ABS2 | 7 | 168 | 2 | ABS | 702,496451 | 18,36369 | 29,8% | 27,9% | -1,8%  | 0       | 0,04852 | 0        |
| BPE    | t7_ABS2 | 7 | 168 | 2 | ABS | 865,316411 | 1,084666 | 13,5% | 13,4% | -0,1%  | 0       | 0,04852 | 0        |
| BPFL   | t7_ABS2 | 7 | 168 | 2 | ABS | 365,072685 | 132,148  | 63,5% | 50,3% | -13,2% | 0       | 0,04852 | 0        |
| BPM    | t7_ABS2 | 7 | 168 | 2 | ABS | 398,041291 | 183,4079 | 60,2% | 41,9% | -18,3% | 0       | 0,04852 | 0        |
| BPP    | t7_ABS2 | 7 | 168 | 2 | ABS | 242,625601 | 231,2294 | 75,7% | 52,6% | -23,1% | 0       | 0,04852 | 0        |
| BPPH   | t7_ABS2 | 7 | 168 | 2 | ABS | 115,508963 | 150,2047 | 88,4% | 73,4% | -15,0% | 0       | 0,04852 | 0        |
| BPS    | t7_ABS2 | 7 | 168 | 2 | ABS | 764,401722 | 0,079532 | 23,6% | 23,6% | 0,0%   | 0       | 0,04852 | 0        |
| BPZ    | t7_ABS2 | 7 | 168 | 2 | ABS | 816,980917 | 17,62469 | 18,3% | 16,5% | -1,8%  | 0       | 0,04852 | 0        |
| 22BPF  | t7_ABS3 | 7 | 168 | 3 | ABS | 825,593097 | 0,666095 | 17,4% | 17,4% | -0,1%  | 0       | 0,01446 | 0        |
| 24BPF  | t7_ABS3 | 7 | 168 | 3 | ABS | 814,067375 | 0,56525  | 18,6% | 18,5% | -0,1%  | 0       | 0,01446 | 0        |
| 44BPF  | t7_ABS3 | 7 | 168 | 3 | ABS | 838,753784 | 0,813807 | 16,1% | 16,0% | -0,1%  | 0       | 0,01446 | 0        |
| BP26DM | t7_ABS3 | 7 | 168 | 3 | ABS | 709,031233 | 5,964941 | 29,1% | 28,5% | -0,6%  | 0       | 0,01446 | 0        |
| BPA    | t7_ABS3 | 7 | 168 | 3 | ABS | 764,246943 | 0        | 23,6% | 23,6% | 0,0%   | 0       | 0,01446 | 0        |
| BPAF   | t7_ABS3 | 7 | 168 | 3 | ABS | 720,510692 | 29,03391 | 27,9% | 25,0% | -2,9%  | 0       | 0,01446 | 0        |
| BPAP   | t7_ABS3 | 7 | 168 | 3 | ABS | 779,542406 | 17,49054 | 22,0% | 20,3% | -1,7%  | 0       | 0,01446 | 0        |
| BPB    | t7_ABS3 | 7 | 168 | 3 | ABS | 792,396354 | 3,810581 | 20,8% | 20,4% | -0,4%  | 0       | 0,01446 | 0        |
| BPBP   | t7_ABS3 | 7 | 168 | 3 | ABS | 418,516445 | 163,9123 | 58,1% | 41,8% | -16,4% | 0       | 0,01446 | 0        |
| BPC    | t7_ABS3 | 7 | 168 | 3 | ABS | 751,028023 | 5,060162 | 24,9% | 24,4% | -0,5%  | 0       | 0,01446 | 0        |
| BPC2   | t7_ABS3 | 7 | 168 | 3 | ABS | 691,063956 | 14,58574 | 30,9% | 29,4% | -1,5%  | 0       | 0,01446 | 0        |
| BPE    | t7_ABS3 | 7 | 168 | 3 | ABS | 812,532884 | 0,730071 | 18,7% | 18,7% | -0,1%  | 0       | 0,01446 | 0        |
| BPFL   | t7_ABS3 | 7 | 168 | 3 | ABS | 388,581952 | 118,331  | 61,1% | 49,3% | -11,8% | 0       | 0,01446 | 0        |
| BPM    | t7_ABS3 | 7 | 168 | 3 | ABS | 430,467192 | 134,2845 | 57,0% | 43,5% | -13,4% | 0       | 0,01446 | 0        |
| BPP    | t7_ABS3 | 7 | 168 | 3 | ABS | 301,056501 | 171,6231 | 69,9% | 52,7% | -17,2% | 0       | 0,01446 | 0        |
| BPPH   | t7_ABS3 | 7 | 168 | 3 | ABS | 190,436514 | 100,035  | 81,0% | 71,0% | -10,0% | 0       | 0,01446 | 0        |
| BPS    | t7_ABS3 | 7 | 168 | 3 | ABS | 786,100984 | 0,097157 | 21,4% | 21,4% | 0,0%   | 0       | 0,01446 | 0        |
| BPZ    | t7_ABS3 | 7 | 168 | 3 | ABS | 783,225114 | 14,67922 | 21,7% | 20,2% | -1,5%  | 0       | 0,01446 | 0        |
| 22BPF  | t7_ABT1 | 7 | 168 | 1 | ABT | 867,698835 | 0,2      | 13,2% | 13,2% | 0,0%   | 0       | 0,12303 | 0        |
| 24BPF  | t7_ABT1 | 7 | 168 | 1 | ABT | 880,350217 | 0,430006 | 12,0% | 11,9% | 0,0%   | 0       | 0,12303 | 0        |
| 44BPF  | t7_ABT1 | 7 | 168 | 1 | ABT | 892,448958 | 0,549905 | 10,8% | 10,7% | -0,1%  | 0       | 0,12303 | 0        |
| BP26DM | t7_ABT1 | 7 | 168 | 1 | ABT | 670,65954  | 5,646385 | 32,9% | 32,4% | -0,6%  | 0       | 0,12303 | 0        |
| BPA    | t7_ABT1 | 7 | 168 | 1 | ABT | 856,520875 | 0        | 14,3% | 14,3% | 0,0%   | 0       | 0,12303 | 0        |
| BPAF   | t7_ABT1 | 7 | 168 | 1 | ABT | 768,675687 | 35,32619 | 23,1% | 19,6% | -3,5%  | 0       | 0,12303 | 0        |
| BPAP   | t7_ABT1 | 7 | 168 | 1 | ABT | 805,906083 | 22,4027  | 19,4% | 17,2% | -2,2%  | 0       | 0,12303 | 0        |
| BPB    | t7_ABT1 | 7 | 168 | 1 | ABT | 916,522357 | 5,754659 | 8,3%  | 7,8%  | -0,6%  | 0       | 0,12303 | 0        |
| BPBP   | t7_ABT1 | 7 | 168 | 1 | ABT | 439,542934 | 206,7797 | 56,0% | 35,4% | -20,7% | 0       | 0,12303 | 0        |
| BPC    | t7_ABT1 | 7 | 168 | 1 | ABT | 848,657358 | 6,387487 | 15,1% | 14,5% | -0,6%  | 0       | 0,12303 | 0        |
| BPC2   | t7_ABT1 | 7 | 168 | 1 | ABT | 821,065143 | 19,70469 | 17,9% | 15,9% | -2,0%  | 0       | 0,12303 | 0        |
| BPE    | t7_ABT1 | 7 | 168 | 1 | ABT | 864,277879 | 1,038119 | 13,6% | 13,5% | -0,1%  | 0       | 0,12303 | 0        |
| BPFL   | t7_ABT1 | 7 | 168 | 1 | ABT | 429,673091 | 143,5552 | 57,0% | 42,7% | -14,4% | 0       | 0,12303 | 0        |
| BPM    | t7_ABT1 | 7 | 168 | 1 | ABT | 386,511718 | 159,7116 | 61,3% | 45,4% | -16,0% | 0       | 0,12303 | 0        |
| BPP    | t7_ABT1 | 7 | 168 | 1 | ABT | 267,292585 | 197,1077 | 73,3% | 53,6% | -19,7% | 0       | 0,12303 | 0        |
| BPPH   | t7_ABT1 | 7 | 168 | 1 | ABT | 141,498088 | 97,22695 | 85,9% | 76,1% | -9,7%  | 0       | 0,12303 | 0        |
| BPS    | t7_ABT1 | 7 | 168 | 1 | ABT | 875,927475 | 0,164481 | 12,4% | 12,4% | 0,0%   | 0       | 0,12303 | 0        |
| BPZ    | t7_ABT1 | 7 | 168 | 1 | ABT | 867,994268 | 19,99582 | 13,2% | 11,2% | -2,0%  | 0       | 0,12303 | 0        |
| 22BPF  | t7_ABT2 | 7 | 168 | 2 | ABT | 847,001091 | 1,538238 | 15,3% | 15,1% | -0,2%  | 0,00004 | 0,08444 | 0,000474 |
| 24BPF  | t7_ABT2 | 7 | 168 | 2 | ABT | 799,749119 | 1,587612 | 20,0% | 19,9% | -0,2%  | 0,00004 | 0,08444 | 0,000474 |
| 44BPF  | t7_ABT2 | 7 | 168 | 2 | ABT | 872,633511 | 1,622277 | 12,7% | 12,6% | -0,2%  | 0,00004 | 0,08444 | 0,000474 |
| BP26DM | t7_ABT2 | 7 | 168 | 2 | ABT | 622,849459 | 11,28563 | 37,7% | 36,6% | -1,1%  | 0,00004 | 0,08444 | 0,000474 |
| BPA    | t7_ABT2 | 7 | 168 | 2 | ABT | 788,347242 | 2,070302 | 21,2% | 21,0% | -0,2%  | 0,00004 | 0,08444 | 0,000474 |
| BPAF   | t7_ABT2 | 7 | 168 | 2 | ABT | 716,706811 | 46,63258 | 28,3% | 23,7% | -4,7%  | 0,00004 | 0,08444 | 0,000474 |
| BPAP   | t7_ABT2 | 7 | 168 | 2 | ABT | 821,938942 | 27,22311 | 17,8% | 15,1% | -2,7%  | 0,00004 | 0,08444 | 0,000474 |
| BPB    | t7_ABT2 | 7 | 168 | 2 | ABT | 872,465718 | 6,814935 | 12,8% | 12,1% | -0,7%  | 0,00004 | 0,08444 | 0,000474 |

|        |         |   |       |     |            |          |        |        |        |         |         |          |
|--------|---------|---|-------|-----|------------|----------|--------|--------|--------|---------|---------|----------|
| BPBP   | t7_ABT2 | 7 | 168 2 | ABT | 438,103746 | 257,0321 | 56,2%  | 30,5%  | -25,7% | 0,00004 | 0,08444 | 0,000474 |
| BPC    | t7_ABT2 | 7 | 168 2 | ABT | 795,671934 | 9,220539 | 20,4%  | 19,5%  | -0,9%  | 0,00004 | 0,08444 | 0,000474 |
| BPC2   | t7_ABT2 | 7 | 168 2 | ABT | 774,521821 | 24,55649 | 22,5%  | 20,1%  | -2,5%  | 0,00004 | 0,08444 | 0,000474 |
| BPE    | t7_ABT2 | 7 | 168 2 | ABT | 802,981797 | 1,563283 | 19,7%  | 19,5%  | -0,2%  | 0,00004 | 0,08444 | 0,000474 |
| BPFL   | t7_ABT2 | 7 | 168 2 | ABT | 416,776069 | 172,7838 | 58,3%  | 41,0%  | -17,3% | 0,00004 | 0,08444 | 0,000474 |
| BPM    | t7_ABT2 | 7 | 168 2 | ABT | 337,151316 | 238,2889 | 66,3%  | 42,5%  | -23,8% | 0,00004 | 0,08444 | 0,000474 |
| BPP    | t7_ABT2 | 7 | 168 2 | ABT | 245,012974 | 305,6762 | 75,5%  | 44,9%  | -30,6% | 0,00004 | 0,08444 | 0,000474 |
| BPBH   | t7_ABT2 | 7 | 168 2 | ABT | 112,773872 | 220,5157 | 88,7%  | 66,7%  | -22,1% | 0,00004 | 0,08444 | 0,000474 |
| BPS    | t7_ABT2 | 7 | 168 2 | ABT | 868,803786 | 0,097862 | 13,1%  | 13,1%  | 0,0%   | 0,00004 | 0,08444 | 0,000474 |
| BPZ    | t7_ABT2 | 7 | 168 2 | ABT | 791,232833 | 24,38166 | 20,9%  | 18,4%  | -2,4%  | 0,00004 | 0,08444 | 0,000474 |
| 22BPF  | t7_ABT3 | 7 | 168 3 | ABT | 779,494006 | 0,946007 | 22,1%  | 22,0%  | -0,1%  | 0,00008 | 0,1724  | 0,000464 |
| 24BPF  | t7_ABT3 | 7 | 168 3 | ABT | 805,036847 | 0,823305 | 19,5%  | 19,4%  | -0,1%  | 0,00008 | 0,1724  | 0,000464 |
| 44BPF  | t7_ABT3 | 7 | 168 3 | ABT | 812,051648 | 0,514881 | 18,8%  | 18,7%  | -0,1%  | 0,00008 | 0,1724  | 0,000464 |
| BP26DM | t7_ABT3 | 7 | 168 3 | ABT | 485,378022 | 8,065626 | 51,5%  | 50,7%  | -0,8%  | 0,00008 | 0,1724  | 0,000464 |
| BPA    | t7_ABT3 | 7 | 168 3 | ABT | 860,98625  | 0        | 13,9%  | 13,9%  | 0,0%   | 0,00008 | 0,1724  | 0,000464 |
| BPAF   | t7_ABT3 | 7 | 168 3 | ABT | 648,433467 | 36,19368 | 35,2%  | 31,5%  | -3,6%  | 0,00008 | 0,1724  | 0,000464 |
| BPAP   | t7_ABT3 | 7 | 168 3 | ABT | 715,070445 | 23,8911  | 28,5%  | 26,1%  | -2,4%  | 0,00008 | 0,1724  | 0,000464 |
| BPB    | t7_ABT3 | 7 | 168 3 | ABT | 804,097672 | 5,887014 | 19,6%  | 19,0%  | -0,6%  | 0,00008 | 0,1724  | 0,000464 |
| BPBP   | t7_ABT3 | 7 | 168 3 | ABT | 335,585933 | 182,6208 | 66,4%  | 48,2%  | -18,3% | 0,00008 | 0,1724  | 0,000464 |
| BPC    | t7_ABT3 | 7 | 168 3 | ABT | 704,89782  | 6,617992 | 29,5%  | 28,8%  | -0,7%  | 0,00008 | 0,1724  | 0,000464 |
| BPC2   | t7_ABT3 | 7 | 168 3 | ABT | 676,127216 | 19,97673 | 32,4%  | 30,4%  | -2,0%  | 0,00008 | 0,1724  | 0,000464 |
| BPE    | t7_ABT3 | 7 | 168 3 | ABT | 779,811757 | 0,966345 | 22,0%  | 21,9%  | -0,1%  | 0,00008 | 0,1724  | 0,000464 |
| BPFL   | t7_ABT3 | 7 | 168 3 | ABT | 334,013027 | 129,3476 | 66,6%  | 53,7%  | -12,9% | 0,00008 | 0,1724  | 0,000464 |
| BPM    | t7_ABT3 | 7 | 168 3 | ABT | 297,623428 | 156,3595 | 70,2%  | 54,6%  | -15,6% | 0,00008 | 0,1724  | 0,000464 |
| BPP    | t7_ABT3 | 7 | 168 3 | ABT | 192,017406 | 211,9852 | 80,8%  | 59,6%  | -21,2% | 0,00008 | 0,1724  | 0,000464 |
| BPBH   | t7_ABT3 | 7 | 168 3 | ABT | 98,875932  | 109,2587 | 90,1%  | 79,2%  | -10,9% | 0,00008 | 0,1724  | 0,000464 |
| BPS    | t7_ABT3 | 7 | 168 3 | ABT | 772,709003 | 0,107606 | 22,7%  | 22,7%  | 0,0%   | 0,00008 | 0,1724  | 0,000464 |
| BPZ    | t7_ABT3 | 7 | 168 3 | ABT | 710,858195 | 19,87297 | 28,9%  | 26,9%  | -2,0%  | 0,00008 | 0,1724  | 0,000464 |
| 22BPF  | t7_BA1  | 7 | 168 1 | BA  | 1,17847409 | 0,184343 | 99,9%  | 99,9%  | 0,0%   | 2,82435 | 0,26307 | 10,73612 |
| 24BPF  | t7_BA1  | 7 | 168 1 | BA  | 0,81425256 | 0,25742  | 99,9%  | 99,9%  | 0,0%   | 2,82435 | 0,26307 | 10,73612 |
| 44BPF  | t7_BA1  | 7 | 168 1 | BA  | 1,70626308 | 0,370699 | 99,8%  | 99,8%  | 0,0%   | 2,82435 | 0,26307 | 10,73612 |
| BP26DM | t7_BA1  | 7 | 168 1 | BA  | 0,35811407 | 0,176679 | 100,0% | 99,9%  | 0,0%   | 2,82435 | 0,26307 | 10,73612 |
| BPA    | t7_BA1  | 7 | 168 1 | BA  | 0          | 30,12555 | 100,0% | 97,0%  | -3,0%  | 2,82435 | 0,26307 | 10,73612 |
| BPAF   | t7_BA1  | 7 | 168 1 | BA  | 1,75789531 | 0,213958 | 99,8%  | 99,8%  | 0,0%   | 2,82435 | 0,26307 | 10,73612 |
| BPAP   | t7_BA1  | 7 | 168 1 | BA  | 0,92406834 | 0,246986 | 99,9%  | 99,9%  | 0,0%   | 2,82435 | 0,26307 | 10,73612 |
| BPB    | t7_BA1  | 7 | 168 1 | BA  | 1,18106858 | 0,10249  | 99,9%  | 99,9%  | 0,0%   | 2,82435 | 0,26307 | 10,73612 |
| BPBP   | t7_BA1  | 7 | 168 1 | BA  | 0,8628823  | 0,057151 | 99,9%  | 99,9%  | 0,0%   | 2,82435 | 0,26307 | 10,73612 |
| BPC    | t7_BA1  | 7 | 168 1 | BA  | 0,49512943 | 0,113845 | 100,0% | 99,9%  | 0,0%   | 2,82435 | 0,26307 | 10,73612 |
| BPC2   | t7_BA1  | 7 | 168 1 | BA  | 0,19744078 | 0,201418 | 100,0% | 100,0% | 0,0%   | 2,82435 | 0,26307 | 10,73612 |
| BPE    | t7_BA1  | 7 | 168 1 | BA  | 0,82500893 | 0,150997 | 99,9%  | 99,9%  | 0,0%   | 2,82435 | 0,26307 | 10,73612 |
| BPFL   | t7_BA1  | 7 | 168 1 | BA  | 0,13181475 | 0,473721 | 100,0% | 99,9%  | 0,0%   | 2,82435 | 0,26307 | 10,73612 |
| BPM    | t7_BA1  | 7 | 168 1 | BA  | 0,05799968 | 0,035825 | 100,0% | 100,0% | 0,0%   | 2,82435 | 0,26307 | 10,73612 |
| BPP    | t7_BA1  | 7 | 168 1 | BA  | 1,03868194 | 0,688354 | 99,9%  | 99,8%  | -0,1%  | 2,82435 | 0,26307 | 10,73612 |
| BPBH   | t7_BA1  | 7 | 168 1 | BA  | 0,35032451 | 0,170829 | 100,0% | 99,9%  | 0,0%   | 2,82435 | 0,26307 | 10,73612 |
| BPS    | t7_BA1  | 7 | 168 1 | BA  | 7,48914564 | 2,681924 | 99,3%  | 99,0%  | -0,3%  | 2,82435 | 0,26307 | 10,73612 |
| BPZ    | t7_BA1  | 7 | 168 1 | BA  | 0,65884478 | 0,243962 | 99,9%  | 99,9%  | 0,0%   | 2,82435 | 0,26307 | 10,73612 |
| 22BPF  | t7_BA2  | 7 | 168 2 | BA  | 0,98953374 | 0,381125 | 99,9%  | 99,9%  | 0,0%   | 4,898   | 0,29461 | 16,62537 |
| 24BPF  | t7_BA2  | 7 | 168 2 | BA  | 0,6998241  | 0,450972 | 99,9%  | 99,9%  | 0,0%   | 4,898   | 0,29461 | 16,62537 |
| 44BPF  | t7_BA2  | 7 | 168 2 | BA  | 2,12223778 | 0,103188 | 99,8%  | 99,8%  | 0,0%   | 4,898   | 0,29461 | 16,62537 |
| BP26DM | t7_BA2  | 7 | 168 2 | BA  | 0,27824357 | 0,07041  | 100,0% | 100,0% | 0,0%   | 4,898   | 0,29461 | 16,62537 |
| BPA    | t7_BA2  | 7 | 168 2 | BA  | 0          | 26,64008 | 100,0% | 97,3%  | -2,7%  | 4,898   | 0,29461 | 16,62537 |
| BPAF   | t7_BA2  | 7 | 168 2 | BA  | 0,92930074 | 0,545362 | 99,9%  | 99,9%  | -0,1%  | 4,898   | 0,29461 | 16,62537 |
| BPAP   | t7_BA2  | 7 | 168 2 | BA  | 0,45194645 | 0,074457 | 100,0% | 99,9%  | 0,0%   | 4,898   | 0,29461 | 16,62537 |
| BPB    | t7_BA2  | 7 | 168 2 | BA  | 0,34825008 | 0,096688 | 100,0% | 100,0% | 0,0%   | 4,898   | 0,29461 | 16,62537 |
| BPBP   | t7_BA2  | 7 | 168 2 | BA  | 0,3530194  | 0,075355 | 100,0% | 100,0% | 0,0%   | 4,898   | 0,29461 | 16,62537 |
| BPC    | t7_BA2  | 7 | 168 2 | BA  | 0,22619506 | 0,02     | 100,0% | 100,0% | 0,0%   | 4,898   | 0,29461 | 16,62537 |
| BPC2   | t7_BA2  | 7 | 168 2 | BA  | 0,13487245 | 0,15846  | 100,0% | 100,0% | 0,0%   | 4,898   | 0,29461 | 16,62537 |
| BPE    | t7_BA2  | 7 | 168 2 | BA  | 0,53744956 | 0,13688  | 99,9%  | 99,9%  | 0,0%   | 4,898   | 0,29461 | 16,62537 |
| BPFL   | t7_BA2  | 7 | 168 2 | BA  | 0,13400138 | 1,703176 | 100,0% | 99,8%  | -0,2%  | 4,898   | 0,29461 | 16,62537 |
| BPM    | t7_BA2  | 7 | 168 2 | BA  | 0,02379982 | 0,02212  | 100,0% | 100,0% | 0,0%   | 4,898   | 0,29461 | 16,62537 |
| BPP    | t7_BA2  | 7 | 168 2 | BA  | 0,79821034 | 0,702632 | 99,9%  | 99,8%  | -0,1%  | 4,898   | 0,29461 | 16,62537 |
| BPBH   | t7_BA2  | 7 | 168 2 | BA  | 0,01816257 | 0,016835 | 100,0% | 100,0% | 0,0%   | 4,898   | 0,29461 | 16,62537 |
| BPS    | t7_BA2  | 7 | 168 2 | BA  | 3,26162612 | 5,615156 | 99,7%  | 99,1%  | -0,6%  | 4,898   | 0,29461 | 16,62537 |
| BPZ    | t7_BA2  | 7 | 168 2 | BA  | 0,48464469 | 0,206965 | 100,0% | 99,9%  | 0,0%   | 4,898   | 0,29461 | 16,62537 |
| 22BPF  | t7_BA3  | 7 | 168 3 | BA  | 0,32955751 | 0,149592 | 100,0% | 100,0% | 0,0%   | 7,12831 | 0,36956 | 19,28864 |
| 24BPF  | t7_BA3  | 7 | 168 3 | BA  | 0,67290927 | 0,276692 | 99,9%  | 99,9%  | 0,0%   | 7,12831 | 0,36956 | 19,28864 |
| 44BPF  | t7_BA3  | 7 | 168 3 | BA  | 0,24413114 | 0,396542 | 100,0% | 99,9%  | 0,0%   | 7,12831 | 0,36956 | 19,28864 |
| BP26DM | t7_BA3  | 7 | 168 3 | BA  | 0,1630608  | 0,098169 | 100,0% | 100,0% | 0,0%   | 7,12831 | 0,36956 | 19,28864 |
| BPA    | t7_BA3  | 7 | 168 3 | BA  | 8,23789196 | 22,34017 | 99,2%  | 96,9%  | -2,2%  | 7,12831 | 0,36956 | 19,28864 |
| BPAF   | t7_BA3  | 7 | 168 3 | BA  | 1,04145485 | 0,650619 | 99,9%  | 99,8%  | -0,1%  | 7,12831 | 0,36956 | 19,28864 |
| BPAP   | t7_BA3  | 7 | 168 3 | BA  | 0,32644589 | 0,053597 | 100,0% | 100,0% | 0,0%   | 7,12831 | 0,36956 | 19,28864 |
| BPB    | t7_BA3  | 7 | 168 3 | BA  | 0,10721711 | 0,157594 | 100,0% | 100,0% | 0,0%   | 7,12831 | 0,36956 | 19,28864 |
| BPBP   | t7_BA3  | 7 | 168 3 | BA  | 0,44016712 | 0,068471 | 100,0% | 99,9%  | 0,0%   | 7,12831 | 0,36956 | 19,28864 |
| BPC    | t7_BA3  | 7 | 168 3 | BA  | 0,46777772 | 0,04068  | 100,0% | 99,9%  | 0,0%   | 7,12831 | 0,36956 | 19,28864 |
| BPC2   | t7_BA3  | 7 | 168 3 | BA  | 0,241108   | 0,354406 | 100,0% | 99,9%  | 0,0%   | 7,12831 | 0,36956 | 19,28864 |
| BPE    | t7_BA3  | 7 | 168 3 | BA  | 0,30417752 | 0,131833 | 100,0% | 100,0% | 0,0%   | 7,12831 | 0,36956 | 19,28864 |
| BPFL   | t7_BA3  | 7 | 168 3 | BA  | 0,60415226 | 1,083912 | 99,9%  | 99,8%  | -0,1%  | 7,12831 | 0,36956 | 19,28864 |
| BPM    | t7_BA3  | 7 | 168 3 | BA  | 0,04007608 | 0,090611 | 100,0% | 100,0% | 0,0%   | 7,12831 | 0,36956 | 19,28864 |
| BPP    | t7_BA3  | 7 | 168 3 | BA  | 0,86762681 | 0,68141  | 99,9%  | 99,8%  | -0,1%  | 7,12831 | 0,36956 | 19,28864 |
| BPBH   | t7_BA3  | 7 | 168 3 | BA  | 0,02117467 | 0,06774  | 100,0% | 100,0% | 0,0%   | 7,12831 | 0,36956 | 19,28864 |
| BPS    | t7_BA3  | 7 | 168 3 | BA  | 2,23485017 | 7,349916 | 99,8%  | 99,0%  | -0,7%  | 7,12831 | 0,36956 | 19,28864 |
| BPZ    | t7_BA3  | 7 | 168 3 | BA  | 0,28752238 | 0,11597  | 100,0% | 100,0% | 0,0%   | 7,12831 | 0,36956 | 19,28864 |
| 22BPF  | t7_BB1  | 7 | 168 1 | BB  | 0,40254404 | 0,180821 | 100,0% | 99,9%  | 0,0%   | 0,0002  | 8,79729 | 2,27E-05 |
| 24BPF  | t7_BB1  | 7 | 168 1 | BB  | 0,94474426 | 0,441312 | 99,9%  | 99,9%  | 0,0%   | 0,0002  | 8,79729 | 2,27E-05 |
| 44BPF  | t7_BB1  | 7 | 168 1 | BB  | 1,66282274 | 0,985035 | 99,8%  | 99,7%  | -0,1%  | 0,0002  | 8,79729 | 2,27E-05 |
| BP26DM | t7_BB1  | 7 | 168 1 | BB  | 0,16695891 | 0,069822 | 100,0% | 100,0% | 0,0%   | 0,0002  | 8,79729 | 2,27E-05 |



|        |        |   |     |   |    |            |          |        |        |       |         |          |          |
|--------|--------|---|-----|---|----|------------|----------|--------|--------|-------|---------|----------|----------|
| BPA    | t7_BB1 | 7 | 168 | 1 | BB | 8,58969163 | 38,37296 | 99,1%  | 95,3%  | -3,8% | 0,0002  | 8,79729  | 2,27E-05 |
| BPAF   | t7_BB1 | 7 | 168 | 1 | BB | 2,49428225 | 0,24612  | 99,8%  | 99,7%  | 0,0%  | 0,0002  | 8,79729  | 2,27E-05 |
| BPAP   | t7_BB1 | 7 | 168 | 1 | BB | 0,3586031  | 0,035138 | 100,0% | 100,0% | 0,0%  | 0,0002  | 8,79729  | 2,27E-05 |
| BPB    | t7_BB1 | 7 | 168 | 1 | BB | 0,17710814 | 0,083779 | 100,0% | 100,0% | 0,0%  | 0,0002  | 8,79729  | 2,27E-05 |
| BPBP   | t7_BB1 | 7 | 168 | 1 | BB | 0,40316314 | 0,070951 | 100,0% | 100,0% | 0,0%  | 0,0002  | 8,79729  | 2,27E-05 |
| BPC    | t7_BB1 | 7 | 168 | 1 | BB | 0,04332733 | 0,044024 | 100,0% | 100,0% | 0,0%  | 0,0002  | 8,79729  | 2,27E-05 |
| BPC2   | t7_BB1 | 7 | 168 | 1 | BB | 0,49027857 | 0,334765 | 100,0% | 99,9%  | 0,0%  | 0,0002  | 8,79729  | 2,27E-05 |
| BPE    | t7_BB1 | 7 | 168 | 1 | BB | 0,43157042 | 0,077135 | 100,0% | 99,9%  | 0,0%  | 0,0002  | 8,79729  | 2,27E-05 |
| BPFL   | t7_BB1 | 7 | 168 | 1 | BB | 0,20755714 | 0,962791 | 100,0% | 99,9%  | -0,1% | 0,0002  | 8,79729  | 2,27E-05 |
| BPM    | t7_BB1 | 7 | 168 | 1 | BB | 0,02488413 | 0,013636 | 100,0% | 100,0% | 0,0%  | 0,0002  | 8,79729  | 2,27E-05 |
| BPP    | t7_BB1 | 7 | 168 | 1 | BB | 0,61296873 | 0,764671 | 99,9%  | 99,9%  | -0,1% | 0,0002  | 8,79729  | 2,27E-05 |
| BPPH   | t7_BB1 | 7 | 168 | 1 | BB | 0,10648098 | 0,01467  | 100,0% | 100,0% | 0,0%  | 0,0002  | 8,79729  | 2,27E-05 |
| BPS    | t7_BB1 | 7 | 168 | 1 | BB | 8,12234884 | 0,40473  | 99,2%  | 99,1%  | 0,0%  | 0,0002  | 8,79729  | 2,27E-05 |
| BPZ    | t7_BB1 | 7 | 168 | 1 | BB | 0,36356248 | 0,060831 | 100,0% | 100,0% | 0,0%  | 0,0002  | 8,79729  | 2,27E-05 |
| 22BPF  | t7_BB2 | 7 | 168 | 2 | BB | 0,35101788 | 0,503114 | 100,0% | 99,9%  | -0,1% | 0,0001  | 9,32904  | 1,07E-05 |
| 24BPF  | t7_BB2 | 7 | 168 | 2 | BB | 1,00412109 | 0,392215 | 99,9%  | 99,9%  | 0,0%  | 0,0001  | 9,32904  | 1,07E-05 |
| 44BPF  | t7_BB2 | 7 | 168 | 2 | BB | 1,10416463 | 0,200226 | 99,9%  | 99,9%  | 0,0%  | 0,0001  | 9,32904  | 1,07E-05 |
| BP26DM | t7_BB2 | 7 | 168 | 2 | BB | 0,12962105 | 0,021322 | 100,0% | 100,0% | 0,0%  | 0,0001  | 9,32904  | 1,07E-05 |
| BPA    | t7_BB2 | 7 | 168 | 2 | BB | 0          | 34,80908 | 100,0% | 96,5%  | -3,5% | 0,0001  | 9,32904  | 1,07E-05 |
| BPAF   | t7_BB2 | 7 | 168 | 2 | BB | 1,13128942 | 0,349543 | 99,9%  | 99,9%  | 0,0%  | 0,0001  | 9,32904  | 1,07E-05 |
| BPAP   | t7_BB2 | 7 | 168 | 2 | BB | 0,3029573  | 0,134631 | 100,0% | 100,0% | 0,0%  | 0,0001  | 9,32904  | 1,07E-05 |
| BPB    | t7_BB2 | 7 | 168 | 2 | BB | 0,2211239  | 0,055006 | 100,0% | 100,0% | 0,0%  | 0,0001  | 9,32904  | 1,07E-05 |
| BPBP   | t7_BB2 | 7 | 168 | 2 | BB | 0,08335726 | 0,085795 | 100,0% | 100,0% | 0,0%  | 0,0001  | 9,32904  | 1,07E-05 |
| BPC    | t7_BB2 | 7 | 168 | 2 | BB | 0,01840193 | 0,047219 | 100,0% | 100,0% | 0,0%  | 0,0001  | 9,32904  | 1,07E-05 |
| BPC2   | t7_BB2 | 7 | 168 | 2 | BB | 0,51845219 | 0,208935 | 99,9%  | 99,9%  | 0,0%  | 0,0001  | 9,32904  | 1,07E-05 |
| BPE    | t7_BB2 | 7 | 168 | 2 | BB | 0,19928074 | 0,103786 | 100,0% | 100,0% | 0,0%  | 0,0001  | 9,32904  | 1,07E-05 |
| BPFL   | t7_BB2 | 7 | 168 | 2 | BB | 0,27039474 | 0,50858  | 100,0% | 99,9%  | -0,1% | 0,0001  | 9,32904  | 1,07E-05 |
| BPM    | t7_BB2 | 7 | 168 | 2 | BB | 0,05676237 | 0,02652  | 100,0% | 100,0% | 0,0%  | 0,0001  | 9,32904  | 1,07E-05 |
| BPP    | t7_BB2 | 7 | 168 | 2 | BB | 0,85894665 | 0,769757 | 99,9%  | 99,8%  | -0,1% | 0,0001  | 9,32904  | 1,07E-05 |
| BPPH   | t7_BB2 | 7 | 168 | 2 | BB | 0,01466232 | 0,028047 | 100,0% | 100,0% | 0,0%  | 0,0001  | 9,32904  | 1,07E-05 |
| BPS    | t7_BB2 | 7 | 168 | 2 | BB | 4,7623172  | 2,55489  | 99,5%  | 99,3%  | -0,3% | 0,0001  | 9,32904  | 1,07E-05 |
| BPZ    | t7_BB2 | 7 | 168 | 2 | BB | 0,214235   | 0,093066 | 100,0% | 100,0% | 0,0%  | 0,0001  | 9,32904  | 1,07E-05 |
| 22BPF  | t7_BB3 | 7 | 168 | 3 | BB | 0,20111775 | 0,16334  | 100,0% | 100,0% | 0,0%  | 0,0006  | 12,72094 | 4,72E-05 |
| 24BPF  | t7_BB3 | 7 | 168 | 3 | BB | 0,92913494 | 0,081985 | 99,9%  | 99,9%  | 0,0%  | 0,0006  | 12,72094 | 4,72E-05 |
| 44BPF  | t7_BB3 | 7 | 168 | 3 | BB | 0,10190649 | 0,065705 | 100,0% | 100,0% | 0,0%  | 0,0006  | 12,72094 | 4,72E-05 |
| BP26DM | t7_BB3 | 7 | 168 | 3 | BB | 0,06896996 | 0,02     | 100,0% | 100,0% | 0,0%  | 0,0006  | 12,72094 | 4,72E-05 |
| BPA    | t7_BB3 | 7 | 168 | 3 | BB | 25,6525237 | 37,76725 | 97,4%  | 93,7%  | -3,8% | 0,0006  | 12,72094 | 4,72E-05 |
| BPAF   | t7_BB3 | 7 | 168 | 3 | BB | 0,53897012 | 0,14036  | 99,9%  | 99,9%  | 0,0%  | 0,0006  | 12,72094 | 4,72E-05 |
| BPAP   | t7_BB3 | 7 | 168 | 3 | BB | 0,06078017 | 0,105272 | 100,0% | 100,0% | 0,0%  | 0,0006  | 12,72094 | 4,72E-05 |
| BPB    | t7_BB3 | 7 | 168 | 3 | BB | 0,43646537 | 0,019904 | 100,0% | 100,0% | 0,0%  | 0,0006  | 12,72094 | 4,72E-05 |
| BPBP   | t7_BB3 | 7 | 168 | 3 | BB | 0,13654471 | 0,058899 | 100,0% | 100,0% | 0,0%  | 0,0006  | 12,72094 | 4,72E-05 |
| BPC    | t7_BB3 | 7 | 168 | 3 | BB | 0,05573465 | 0,02     | 100,0% | 100,0% | 0,0%  | 0,0006  | 12,72094 | 4,72E-05 |
| BPC2   | t7_BB3 | 7 | 168 | 3 | BB | 0,0885274  | 0,141169 | 100,0% | 100,0% | 0,0%  | 0,0006  | 12,72094 | 4,72E-05 |
| BPE    | t7_BB3 | 7 | 168 | 3 | BB | 0,40481989 | 0,115053 | 100,0% | 99,9%  | 0,0%  | 0,0006  | 12,72094 | 4,72E-05 |
| BPFL   | t7_BB3 | 7 | 168 | 3 | BB | 0,4989608  | 0,596135 | 100,0% | 99,9%  | -0,1% | 0,0006  | 12,72094 | 4,72E-05 |
| BPM    | t7_BB3 | 7 | 168 | 3 | BB | 0,04298242 | 0,025557 | 100,0% | 100,0% | 0,0%  | 0,0006  | 12,72094 | 4,72E-05 |
| BPP    | t7_BB3 | 7 | 168 | 3 | BB | 0,55801918 | 0,571927 | 99,9%  | 99,9%  | -0,1% | 0,0006  | 12,72094 | 4,72E-05 |
| BPPH   | t7_BB3 | 7 | 168 | 3 | BB | 0,03034356 | 0,029864 | 100,0% | 100,0% | 0,0%  | 0,0006  | 12,72094 | 4,72E-05 |
| BPS    | t7_BB3 | 7 | 168 | 3 | BB | 2,78046014 | 1,405175 | 99,7%  | 99,6%  | -0,1% | 0,0006  | 12,72094 | 4,72E-05 |
| BPZ    | t7_BB3 | 7 | 168 | 3 | BB | 0,12737926 | 0,150373 | 100,0% | 100,0% | 0,0%  | 0,0006  | 12,72094 | 4,72E-05 |
| 22BPF  | t7_BK1 | 7 | 168 | 1 | BK | 1,35536106 | 0,243088 | 99,9%  | 99,8%  | 0,0%  | 9,12325 | 1,81417  | 5,028884 |
| 24BPF  | t7_BK1 | 7 | 168 | 1 | BK | 1,97534034 | 0,196839 | 99,8%  | 99,8%  | 0,0%  | 9,12325 | 1,81417  | 5,028884 |
| 44BPF  | t7_BK1 | 7 | 168 | 1 | BK | 1,74770703 | 0,082938 | 99,8%  | 99,8%  | 0,0%  | 9,12325 | 1,81417  | 5,028884 |
| BP26DM | t7_BK1 | 7 | 168 | 1 | BK | 0,21435611 | 0,083899 | 100,0% | 100,0% | 0,0%  | 9,12325 | 1,81417  | 5,028884 |
| BPA    | t7_BK1 | 7 | 168 | 1 | BK | 0          | 24,34926 | 100,0% | 97,6%  | -2,4% | 9,12325 | 1,81417  | 5,028884 |
| BPAF   | t7_BK1 | 7 | 168 | 1 | BK | 2,30352352 | 0,445096 | 99,8%  | 99,7%  | 0,0%  | 9,12325 | 1,81417  | 5,028884 |
| BPAP   | t7_BK1 | 7 | 168 | 1 | BK | 1,3840566  | 0,102866 | 99,9%  | 99,9%  | 0,0%  | 9,12325 | 1,81417  | 5,028884 |
| BPB    | t7_BK1 | 7 | 168 | 1 | BK | 1,6195418  | 0,215362 | 99,8%  | 99,8%  | 0,0%  | 9,12325 | 1,81417  | 5,028884 |
| BPBP   | t7_BK1 | 7 | 168 | 1 | BK | 0,97581976 | 0,039553 | 99,9%  | 99,9%  | 0,0%  | 9,12325 | 1,81417  | 5,028884 |
| BPC    | t7_BK1 | 7 | 168 | 1 | BK | 0,75547971 | 0,088218 | 99,9%  | 99,9%  | 0,0%  | 9,12325 | 1,81417  | 5,028884 |
| BPC2   | t7_BK1 | 7 | 168 | 1 | BK | 0,22558698 | 0,148271 | 100,0% | 100,0% | 0,0%  | 9,12325 | 1,81417  | 5,028884 |
| BPE    | t7_BK1 | 7 | 168 | 1 | BK | 1,37471014 | 0,148243 | 99,9%  | 99,8%  | 0,0%  | 9,12325 | 1,81417  | 5,028884 |
| BPFL   | t7_BK1 | 7 | 168 | 1 | BK | 2,11330975 | 0,460824 | 99,9%  | 99,7%  | 0,0%  | 9,12325 | 1,81417  | 5,028884 |
| BPM    | t7_BK1 | 7 | 168 | 1 | BK | 0,70203362 | 0,037854 | 99,9%  | 99,9%  | 0,0%  | 9,12325 | 1,81417  | 5,028884 |
| BPP    | t7_BK1 | 7 | 168 | 1 | BK | 0,9120989  | 0,654968 | 99,9%  | 99,8%  | -0,1% | 9,12325 | 1,81417  | 5,028884 |
| BPPH   | t7_BK1 | 7 | 168 | 1 | BK | 0,20063852 | 0,094199 | 100,0% | 100,0% | 0,0%  | 9,12325 | 1,81417  | 5,028884 |
| BPS    | t7_BK1 | 7 | 168 | 1 | BK | 10,2397201 | 1,919957 | 99,0%  | 98,8%  | -0,2% | 9,12325 | 1,81417  | 5,028884 |
| BPZ    | t7_BK1 | 7 | 168 | 1 | BK | 1,22255755 | 0,028752 | 99,9%  | 99,9%  | 0,0%  | 9,12325 | 1,81417  | 5,028884 |
| 22BPF  | t7_BK2 | 7 | 168 | 2 | BK | 0,45147322 | 0,129126 | 100,0% | 99,9%  | 0,0%  | 5,92565 | 1,95439  | 3,031969 |
| 24BPF  | t7_BK2 | 7 | 168 | 2 | BK | 0,47200976 | 0,292565 | 100,0% | 99,9%  | 0,0%  | 5,92565 | 1,95439  | 3,031969 |
| 44BPF  | t7_BK2 | 7 | 168 | 2 | BK | 0,88198166 | 0,367595 | 99,9%  | 99,9%  | 0,0%  | 5,92565 | 1,95439  | 3,031969 |
| BP26DM | t7_BK2 | 7 | 168 | 2 | BK | 0,03482567 | 0,138906 | 100,0% | 100,0% | 0,0%  | 5,92565 | 1,95439  | 3,031969 |
| BPA    | t7_BK2 | 7 | 168 | 2 | BK | 0          | 19,21848 | 100,0% | 98,1%  | -1,9% | 5,92565 | 1,95439  | 3,031969 |
| BPAF   | t7_BK2 | 7 | 168 | 2 | BK | 0,68444595 | 0,49366  | 99,9%  | 99,9%  | 0,0%  | 5,92565 | 1,95439  | 3,031969 |
| BPAP   | t7_BK2 | 7 | 168 | 2 | BK | 0,04951029 | 0,318932 | 100,0% | 100,0% | 0,0%  | 5,92565 | 1,95439  | 3,031969 |
| BPB    | t7_BK2 | 7 | 168 | 2 | BK | 0,24731053 | 0,100436 | 100,0% | 100,0% | 0,0%  | 5,92565 | 1,95439  | 3,031969 |
| BPBP   | t7_BK2 | 7 | 168 | 2 | BK | 0,16061308 | 0,07827  | 100,0% | 100,0% | 0,0%  | 5,92565 | 1,95439  | 3,031969 |
| BPC    | t7_BK2 | 7 | 168 | 2 | BK | 0,08093668 | 0,05     | 100,0% | 100,0% | 0,0%  | 5,92565 | 1,95439  | 3,031969 |
| BPC2   | t7_BK2 | 7 | 168 | 2 | BK | 0,35679004 | 0,063218 | 100,0% | 100,0% | 0,0%  | 5,92565 | 1,95439  | 3,031969 |
| BPE    | t7_BK2 | 7 | 168 | 2 | BK | 0,32567412 | 0,01634  | 100,0% | 100,0% | 0,0%  | 5,92565 | 1,95439  | 3,031969 |
| BPFL   | t7_BK2 | 7 | 168 | 2 | BK | 0,27492873 | 0,130912 | 100,0% | 100,0% | 0,0%  | 5,92565 | 1,95439  | 3,031969 |
| BPM    | t7_BK2 | 7 | 168 | 2 | BK | 0,06313254 | 0,015822 | 100,0% | 100,0% | 0,0%  | 5,92565 | 1,95439  | 3,031969 |
| BPP    | t7_BK2 | 7 | 168 | 2 | BK | 0,47991934 | 0,763515 | 100,0% | 99,9%  | -0,1% | 5,92565 | 1,95439  | 3,031969 |
| BPPH   | t7_BK2 | 7 | 168 | 2 | BK | 0,05160613 | 0,064748 | 100,0% | 100,0% | 0,0%  | 5,92565 | 1,95439  | 3,031969 |
| BPS    | t7_BK2 | 7 | 168 | 2 | BK | 4,64775956 | 1,026669 | 99,5%  | 99,4%  | -0,1% | 5,92565 | 1,95439  | 3,031969 |
| BPZ    | t7_BK2 | 7 | 168 | 2 | BK | 0,07132019 | 0,097738 | 100,0% | 100,0% | 0,0%  | 5,92565 | 1,95439  | 3,031969 |

|        |        |   |     |   |    |            |          |        |        |        |         |         |          |
|--------|--------|---|-----|---|----|------------|----------|--------|--------|--------|---------|---------|----------|
| 22BPF  | t7_BK3 | 7 | 168 | 3 | BK | 0,168051   | 0,334284 | 100,0% | 99,9%  | 0,0%   | 6,80818 | 2,10669 | 3,231695 |
| 24BPF  | t7_BK3 | 7 | 168 | 3 | BK | 0,31363447 | 0,349138 | 100,0% | 99,9%  | 0,0%   | 6,80818 | 2,10669 | 3,231695 |
| 44BPF  | t7_BK3 | 7 | 168 | 3 | BK | 0,15       | 0,24543  | 100,0% | 100,0% | 0,0%   | 6,80818 | 2,10669 | 3,231695 |
| BP26DM | t7_BK3 | 7 | 168 | 3 | BK | 0,04398837 | 0,042245 | 100,0% | 100,0% | 0,0%   | 6,80818 | 2,10669 | 3,231695 |
| BPA    | t7_BK3 | 7 | 168 | 3 | BK | 0          | 25,22445 | 100,0% | 97,5%  | -2,5%  | 6,80818 | 2,10669 | 3,231695 |
| BPAF   | t7_BK3 | 7 | 168 | 3 | BK | 0,74570551 | 0,121708 | 99,9%  | 99,9%  | 0,0%   | 6,80818 | 2,10669 | 3,231695 |
| BPAP   | t7_BK3 | 7 | 168 | 3 | BK | 0,29126634 | 0,082319 | 100,0% | 100,0% | 0,0%   | 6,80818 | 2,10669 | 3,231695 |
| BPB    | t7_BK3 | 7 | 168 | 3 | BK | 0,16111069 | 0,279325 | 100,0% | 100,0% | 0,0%   | 6,80818 | 2,10669 | 3,231695 |
| BPBP   | t7_BK3 | 7 | 168 | 3 | BK | 0,09167391 | 0,024407 | 100,0% | 100,0% | 0,0%   | 6,80818 | 2,10669 | 3,231695 |
| BPC    | t7_BK3 | 7 | 168 | 3 | BK | 0,03821308 | 0,05     | 100,0% | 100,0% | 0,0%   | 6,80818 | 2,10669 | 3,231695 |
| BPC2   | t7_BK3 | 7 | 168 | 3 | BK | 0,95603288 | 0,506256 | 99,9%  | 99,9%  | -0,1%  | 6,80818 | 2,10669 | 3,231695 |
| BPE    | t7_BK3 | 7 | 168 | 3 | BK | 0,347546   | 0,092792 | 100,0% | 100,0% | 0,0%   | 6,80818 | 2,10669 | 3,231695 |
| BPFL   | t7_BK3 | 7 | 168 | 3 | BK | 0,09238402 | 0,846602 | 100,0% | 99,9%  | -0,1%  | 6,80818 | 2,10669 | 3,231695 |
| BPM    | t7_BK3 | 7 | 168 | 3 | BK | 0,02346893 | 0,027696 | 100,0% | 100,0% | 0,0%   | 6,80818 | 2,10669 | 3,231695 |
| BPP    | t7_BK3 | 7 | 168 | 3 | BK | 0,65356543 | 0,637355 | 99,9%  | 99,9%  | -0,1%  | 6,80818 | 2,10669 | 3,231695 |
| BPPH   | t7_BK3 | 7 | 168 | 3 | BK | 0,1322221  | 0,056819 | 100,0% | 100,0% | 0,0%   | 6,80818 | 2,10669 | 3,231695 |
| BPS    | t7_BK3 | 7 | 168 | 3 | BK | 2,03042613 | 2,5197   | 99,8%  | 99,5%  | -0,3%  | 6,80818 | 2,10669 | 3,231695 |
| BPZ    | t7_BK3 | 7 | 168 | 3 | BK | 0,13595282 | 0,081049 | 100,0% | 100,0% | 0,0%   | 6,80818 | 2,10669 | 3,231695 |
| 22BPF  | t7_EA1 | 7 | 168 | 1 | EA | 771,217089 | 7,930571 | 22,9%  | 22,1%  | -0,8%  | 8,4981  | 0,87086 | 9,758285 |
| 24BPF  | t7_EA1 | 7 | 168 | 1 | EA | 722,050217 | 23,23052 | 27,8%  | 25,5%  | -2,3%  | 8,4981  | 0,87086 | 9,758285 |
| 44BPF  | t7_EA1 | 7 | 168 | 1 | EA | 719,185016 | 14,21484 | 28,1%  | 26,7%  | -1,4%  | 8,4981  | 0,87086 | 9,758285 |
| BP26DM | t7_EA1 | 7 | 168 | 1 | EA | 466,968931 | 21,59282 | 53,3%  | 51,1%  | -2,2%  | 8,4981  | 0,87086 | 9,758285 |
| BPA    | t7_EA1 | 7 | 168 | 1 | EA | 671,210644 | 43,45557 | 32,9%  | 28,5%  | -4,3%  | 8,4981  | 0,87086 | 9,758285 |
| BPAF   | t7_EA1 | 7 | 168 | 1 | EA | 793,129503 | 13,88137 | 20,7%  | 19,3%  | -1,4%  | 8,4981  | 0,87086 | 9,758285 |
| BPAP   | t7_EA1 | 7 | 168 | 1 | EA | 680,121957 | 31,90132 | 32,0%  | 28,8%  | -3,2%  | 8,4981  | 0,87086 | 9,758285 |
| BPB    | t7_EA1 | 7 | 168 | 1 | EA | 712,128272 | 24,59668 | 28,8%  | 26,3%  | -2,5%  | 8,4981  | 0,87086 | 9,758285 |
| BPBP   | t7_EA1 | 7 | 168 | 1 | EA | 360,998361 | 178,6322 | 63,9%  | 46,0%  | -17,9% | 8,4981  | 0,87086 | 9,758285 |
| BPC    | t7_EA1 | 7 | 168 | 1 | EA | 633,408981 | 34,96005 | 36,7%  | 33,2%  | -3,5%  | 8,4981  | 0,87086 | 9,758285 |
| BPC2   | t7_EA1 | 7 | 168 | 1 | EA | 23,9379893 | 1,151169 | 97,6%  | 97,5%  | -0,1%  | 8,4981  | 0,87086 | 9,758285 |
| BPE    | t7_EA1 | 7 | 168 | 1 | EA | 717,041149 | 22,49853 | 28,3%  | 26,0%  | -2,2%  | 8,4981  | 0,87086 | 9,758285 |
| BPFL   | t7_EA1 | 7 | 168 | 1 | EA | 328,059194 | 151,5131 | 67,2%  | 52,0%  | -15,2% | 8,4981  | 0,87086 | 9,758285 |
| BPM    | t7_EA1 | 7 | 168 | 1 | EA | 271,848074 | 164,3945 | 72,8%  | 56,4%  | -16,4% | 8,4981  | 0,87086 | 9,758285 |
| BPP    | t7_EA1 | 7 | 168 | 1 | EA | 149,09343  | 234,6088 | 85,1%  | 61,6%  | -23,5% | 8,4981  | 0,87086 | 9,758285 |
| BPPH   | t7_EA1 | 7 | 168 | 1 | EA | 26,2145996 | 168,4154 | 97,4%  | 80,5%  | -16,8% | 8,4981  | 0,87086 | 9,758285 |
| BPS    | t7_EA1 | 7 | 168 | 1 | EA | 661,374232 | 17,45974 | 33,9%  | 32,1%  | -1,7%  | 8,4981  | 0,87086 | 9,758285 |
| BPZ    | t7_EA1 | 7 | 168 | 1 | EA | 658,218257 | 37,78149 | 34,2%  | 30,4%  | -3,8%  | 8,4981  | 0,87086 | 9,758285 |
| 22BPF  | t7_EA2 | 7 | 168 | 2 | EA | 766,833178 | 6,256201 | 23,3%  | 22,7%  | -0,6%  | 3,59481 | 0,51537 | 6,975202 |
| 24BPF  | t7_EA2 | 7 | 168 | 2 | EA | 726,175552 | 13,93583 | 27,4%  | 26,0%  | -1,4%  | 3,59481 | 0,51537 | 6,975202 |
| 44BPF  | t7_EA2 | 7 | 168 | 2 | EA | 724,758768 | 8,99748  | 27,5%  | 26,6%  | -0,9%  | 3,59481 | 0,51537 | 6,975202 |
| BP26DM | t7_EA2 | 7 | 168 | 2 | EA | 362,699972 | 14,78862 | 63,7%  | 62,3%  | -1,5%  | 3,59481 | 0,51537 | 6,975202 |
| BPA    | t7_EA2 | 7 | 168 | 2 | EA | 737,25341  | 35,02851 | 26,3%  | 22,8%  | -3,5%  | 3,59481 | 0,51537 | 6,975202 |
| BPAF   | t7_EA2 | 7 | 168 | 2 | EA | 775,234571 | 9,171807 | 22,5%  | 21,6%  | -0,9%  | 3,59481 | 0,51537 | 6,975202 |
| BPAP   | t7_EA2 | 7 | 168 | 2 | EA | 681,315862 | 18,93406 | 31,9%  | 30,0%  | -1,9%  | 3,59481 | 0,51537 | 6,975202 |
| BPB    | t7_EA2 | 7 | 168 | 2 | EA | 755,869803 | 16,77142 | 24,4%  | 22,7%  | -1,7%  | 3,59481 | 0,51537 | 6,975202 |
| BPBP   | t7_EA2 | 7 | 168 | 2 | EA | 415,510591 | 93,89761 | 58,4%  | 49,1%  | -9,4%  | 3,59481 | 0,51537 | 6,975202 |
| BPC    | t7_EA2 | 7 | 168 | 2 | EA | 626,832739 | 23,5104  | 37,3%  | 35,0%  | -2,4%  | 3,59481 | 0,51537 | 6,975202 |
| BPC2   | t7_EA2 | 7 | 168 | 2 | EA | 1,16314917 | 0,107828 | 99,9%  | 99,9%  | 0,0%   | 3,59481 | 0,51537 | 6,975202 |
| BPE    | t7_EA2 | 7 | 168 | 2 | EA | 746,110227 | 12,87602 | 25,4%  | 24,1%  | -1,3%  | 3,59481 | 0,51537 | 6,975202 |
| BPFL   | t7_EA2 | 7 | 168 | 2 | EA | 402,549382 | 88,08643 | 59,7%  | 50,9%  | -8,8%  | 3,59481 | 0,51537 | 6,975202 |
| BPM    | t7_EA2 | 7 | 168 | 2 | EA | 318,442557 | 118,5822 | 68,2%  | 56,3%  | -11,9% | 3,59481 | 0,51537 | 6,975202 |
| BPP    | t7_EA2 | 7 | 168 | 2 | EA | 195,873586 | 155,285  | 80,4%  | 64,9%  | -15,5% | 3,59481 | 0,51537 | 6,975202 |
| BPPH   | t7_EA2 | 7 | 168 | 2 | EA | 29,72996   | 89,41293 | 97,0%  | 88,1%  | -8,9%  | 3,59481 | 0,51537 | 6,975202 |
| BPS    | t7_EA2 | 7 | 168 | 2 | EA | 665,210316 | 19,0683  | 33,5%  | 31,6%  | -1,9%  | 3,59481 | 0,51537 | 6,975202 |
| BPZ    | t7_EA2 | 7 | 168 | 2 | EA | 706,00897  | 25,81209 | 29,4%  | 26,8%  | -2,6%  | 3,59481 | 0,51537 | 6,975202 |
| 22BPF  | t7_EA3 | 7 | 168 | 3 | EA | 877,268766 | 5,618305 | 12,3%  | 11,7%  | -0,6%  | 3,68822 | 0,61287 | 6,017948 |
| 24BPF  | t7_EA3 | 7 | 168 | 3 | EA | 849,202939 | 13,80635 | 15,1%  | 13,7%  | -1,4%  | 3,68822 | 0,61287 | 6,017948 |
| 44BPF  | t7_EA3 | 7 | 168 | 3 | EA | 774,657121 | 9,737896 | 22,5%  | 21,6%  | -1,0%  | 3,68822 | 0,61287 | 6,017948 |
| BP26DM | t7_EA3 | 7 | 168 | 3 | EA | 384,560229 | 15,97239 | 61,5%  | 59,9%  | -1,6%  | 3,68822 | 0,61287 | 6,017948 |
| BPA    | t7_EA3 | 7 | 168 | 3 | EA | 787,115093 | 33,68615 | 21,3%  | 17,9%  | -3,4%  | 3,68822 | 0,61287 | 6,017948 |
| BPAF   | t7_EA3 | 7 | 168 | 3 | EA | 869,791456 | 9,153251 | 13,0%  | 12,1%  | -0,9%  | 3,68822 | 0,61287 | 6,017948 |
| BPAP   | t7_EA3 | 7 | 168 | 3 | EA | 763,112243 | 19,51306 | 23,7%  | 21,7%  | -2,0%  | 3,68822 | 0,61287 | 6,017948 |
| BPB    | t7_EA3 | 7 | 168 | 3 | EA | 778,274486 | 18,66037 | 22,2%  | 20,3%  | -1,9%  | 3,68822 | 0,61287 | 6,017948 |
| BPBP   | t7_EA3 | 7 | 168 | 3 | EA | 474,038682 | 86,66049 | 52,6%  | 43,9%  | -8,7%  | 3,68822 | 0,61287 | 6,017948 |
| BPC    | t7_EA3 | 7 | 168 | 3 | EA | 667,073522 | 25,20342 | 33,3%  | 30,8%  | -2,5%  | 3,68822 | 0,61287 | 6,017948 |
| BPC2   | t7_EA3 | 7 | 168 | 3 | EA | 0,81524872 | 0,262339 | 99,9%  | 99,9%  | 0,0%   | 3,68822 | 0,61287 | 6,017948 |
| BPE    | t7_EA3 | 7 | 168 | 3 | EA | 845,60226  | 13,32678 | 15,4%  | 14,1%  | -1,3%  | 3,68822 | 0,61287 | 6,017948 |
| BPFL   | t7_EA3 | 7 | 168 | 3 | EA | 438,651089 | 70,54224 | 56,1%  | 49,1%  | -7,1%  | 3,68822 | 0,61287 | 6,017948 |
| BPM    | t7_EA3 | 7 | 168 | 3 | EA | 338,883464 | 111,2335 | 66,1%  | 55,0%  | -11,1% | 3,68822 | 0,61287 | 6,017948 |
| BPP    | t7_EA3 | 7 | 168 | 3 | EA | 230,347262 | 153,5284 | 77,0%  | 61,6%  | -15,4% | 3,68822 | 0,61287 | 6,017948 |
| BPPH   | t7_EA3 | 7 | 168 | 3 | EA | 40,712022  | 104,2028 | 95,9%  | 85,5%  | -10,4% | 3,68822 | 0,61287 | 6,017948 |
| BPS    | t7_EA3 | 7 | 168 | 3 | EA | 673,911841 | 13,24038 | 32,6%  | 31,3%  | -1,3%  | 3,68822 | 0,61287 | 6,017948 |
| BPZ    | t7_EA3 | 7 | 168 | 3 | EA | 723,707924 | 26,08097 | 27,6%  | 25,0%  | -2,6%  | 3,68822 | 0,61287 | 6,017948 |
| 22BPF  | t7_EB1 | 7 | 168 | 1 | EB | 802,432644 | 14,88552 | 19,8%  | 18,3%  | -1,5%  | 0,0014  | 7,50599 | 0,000187 |
| 24BPF  | t7_EB1 | 7 | 168 | 1 | EB | 767,404365 | 10,13126 | 23,3%  | 22,2%  | -1,0%  | 0,0014  | 7,50599 | 0,000187 |
| 44BPF  | t7_EB1 | 7 | 168 | 1 | EB | 782,256513 | 10,2783  | 21,8%  | 20,7%  | -1,0%  | 0,0014  | 7,50599 | 0,000187 |
| BP26DM | t7_EB1 | 7 | 168 | 1 | EB | 736,479411 | 25,69034 | 26,4%  | 23,8%  | -2,6%  | 0,0014  | 7,50599 | 0,000187 |
| BPA    | t7_EB1 | 7 | 168 | 1 | EB | 556,857958 | 31,94586 | 44,3%  | 41,1%  | -3,2%  | 0,0014  | 7,50599 | 0,000187 |
| BPAF   | t7_EB1 | 7 | 168 | 1 | EB | 721,050799 | 58,34529 | 27,9%  | 22,1%  | -5,8%  | 0,0014  | 7,50599 | 0,000187 |
| BPAP   | t7_EB1 | 7 | 168 | 1 | EB | 696,504799 | 38,8617  | 30,3%  | 26,5%  | -3,9%  | 0,0014  | 7,50599 | 0,000187 |
| BPB    | t7_EB1 | 7 | 168 | 1 | EB | 718,536549 | 12,15333 | 28,1%  | 26,9%  | -1,2%  | 0,0014  | 7,50599 | 0,000187 |
| BPBP   | t7_EB1 | 7 | 168 | 1 | EB | 304,872642 | 220,1874 | 69,5%  | 47,5%  | -22,0% | 0,0014  | 7,50599 | 0,000187 |
| BPC    | t7_EB1 | 7 | 168 | 1 | EB | 720,312748 | 17,66233 | 28,0%  | 26,2%  | -1,8%  | 0,0014  | 7,50599 | 0,000187 |
| BPC2   | t7_EB1 | 7 | 168 | 1 | EB | 599,934626 | 42,97521 | 40,0%  | 35,7%  | -4,3%  | 0,0014  | 7,50599 | 0,000187 |
| BPE    | t7_EB1 | 7 | 168 | 1 | EB | 681,342698 | 7,818194 | 31,9%  | 31,1%  | -0,8%  | 0,0014  | 7,50599 | 0,000187 |
| BPFL   | t7_EB1 | 7 | 168 | 1 | EB | 326,585206 | 175,2873 | 67,3%  | 49,8%  | -17,5% | 0,0014  | 7,50599 | 0,000187 |
| BPM    | t7_EB1 | 7 | 168 | 1 | EB | 149,196716 | 166,7465 | 85,1%  | 68,4%  | -16,7% | 0,0014  | 7,50599 | 0,000187 |

|        |        |   |     |   |    |            |          |        |       |        |         |         |          |
|--------|--------|---|-----|---|----|------------|----------|--------|-------|--------|---------|---------|----------|
| BPP    | t7_EB1 | 7 | 168 | 1 | EB | 76,9972768 | 187,2086 | 92,3%  | 73,6% | -18,7% | 0,0014  | 7,50599 | 0,000187 |
| BPPH   | t7_EB1 | 7 | 168 | 1 | EB | 58,6918833 | 332,055  | 94,1%  | 60,9% | -33,2% | 0,0014  | 7,50599 | 0,000187 |
| BPS    | t7_EB1 | 7 | 168 | 1 | EB | 770,026168 | 7,803304 | 23,0%  | 22,2% | -0,8%  | 0,0014  | 7,50599 | 0,000187 |
| BPZ    | t7_EB1 | 7 | 168 | 1 | EB | 732,782949 | 35,94343 | 26,7%  | 23,1% | -3,6%  | 0,0014  | 7,50599 | 0,000187 |
| 22BPF  | t7_EB2 | 7 | 168 | 2 | EB | 759,970183 | 12,59011 | 24,0%  | 22,7% | -1,3%  | 0,0005  | 7,81457 | 6,4E-05  |
| 24BPF  | t7_EB2 | 7 | 168 | 2 | EB | 736,715689 | 9,916299 | 26,3%  | 25,3% | -1,0%  | 0,0005  | 7,81457 | 6,4E-05  |
| 44BPF  | t7_EB2 | 7 | 168 | 2 | EB | 730,624787 | 7,678146 | 26,9%  | 26,2% | -0,8%  | 0,0005  | 7,81457 | 6,4E-05  |
| BP26DM | t7_EB2 | 7 | 168 | 2 | EB | 703,094961 | 27,08967 | 29,7%  | 27,0% | -2,7%  | 0,0005  | 7,81457 | 6,4E-05  |
| BPA    | t7_EB2 | 7 | 168 | 2 | EB | 534,210021 | 25,26449 | 46,6%  | 44,1% | -2,5%  | 0,0005  | 7,81457 | 6,4E-05  |
| BPAF   | t7_EB2 | 7 | 168 | 2 | EB | 669,970023 | 58,18041 | 33,0%  | 27,2% | -5,8%  | 0,0005  | 7,81457 | 6,4E-05  |
| BPAP   | t7_EB2 | 7 | 168 | 2 | EB | 658,514902 | 37,47838 | 34,1%  | 30,4% | -3,7%  | 0,0005  | 7,81457 | 6,4E-05  |
| BPB    | t7_EB2 | 7 | 168 | 2 | EB | 678,913909 | 11,43371 | 32,1%  | 31,0% | -1,1%  | 0,0005  | 7,81457 | 6,4E-05  |
| BPBP   | t7_EB2 | 7 | 168 | 2 | EB | 291,387848 | 218,4751 | 70,9%  | 49,0% | -21,8% | 0,0005  | 7,81457 | 6,4E-05  |
| BPC    | t7_EB2 | 7 | 168 | 2 | EB | 670,138659 | 18,65304 | 33,0%  | 31,1% | -1,9%  | 0,0005  | 7,81457 | 6,4E-05  |
| BPC2   | t7_EB2 | 7 | 168 | 2 | EB | 533,083358 | 41,83234 | 46,7%  | 42,5% | -4,2%  | 0,0005  | 7,81457 | 6,4E-05  |
| BPE    | t7_EB2 | 7 | 168 | 2 | EB | 642,517447 | 7,18019  | 35,7%  | 35,0% | -0,7%  | 0,0005  | 7,81457 | 6,4E-05  |
| BPFL   | t7_EB2 | 7 | 168 | 2 | EB | 299,500312 | 156,4261 | 70,0%  | 54,4% | -15,6% | 0,0005  | 7,81457 | 6,4E-05  |
| BPM    | t7_EB2 | 7 | 168 | 2 | EB | 138,786193 | 161,3028 | 86,1%  | 70,0% | -16,1% | 0,0005  | 7,81457 | 6,4E-05  |
| BPP    | t7_EB2 | 7 | 168 | 2 | EB | 72,117615  | 175,4213 | 92,8%  | 75,2% | -17,5% | 0,0005  | 7,81457 | 6,4E-05  |
| BPPH   | t7_EB2 | 7 | 168 | 2 | EB | 54,2071972 | 319,5082 | 94,6%  | 62,6% | -32,0% | 0,0005  | 7,81457 | 6,4E-05  |
| BPS    | t7_EB2 | 7 | 168 | 2 | EB | 758,915343 | 4,183076 | 24,1%  | 23,7% | -0,4%  | 0,0005  | 7,81457 | 6,4E-05  |
| BPZ    | t7_EB2 | 7 | 168 | 2 | EB | 712,217493 | 35,13937 | 28,8%  | 25,3% | -3,5%  | 0,0005  | 7,81457 | 6,4E-05  |
| 22BPF  | t7_EB3 | 7 | 168 | 3 | EB | 711,833017 | 11,1336  | 28,8%  | 27,7% | -1,1%  | 0,0006  | 8,58932 | 6,99E-05 |
| 24BPF  | t7_EB3 | 7 | 168 | 3 | EB | 695,806696 | 6,679247 | 30,4%  | 29,8% | -0,7%  | 0,0006  | 8,58932 | 6,99E-05 |
| 44BPF  | t7_EB3 | 7 | 168 | 3 | EB | 701,019526 | 5,214523 | 29,9%  | 29,4% | -0,5%  | 0,0006  | 8,58932 | 6,99E-05 |
| BP26DM | t7_EB3 | 7 | 168 | 3 | EB | 707,493959 | 24,43557 | 29,3%  | 26,8% | -2,4%  | 0,0006  | 8,58932 | 6,99E-05 |
| BPA    | t7_EB3 | 7 | 168 | 3 | EB | 490,289186 | 32,6281  | 51,0%  | 47,7% | -3,3%  | 0,0006  | 8,58932 | 6,99E-05 |
| BPAF   | t7_EB3 | 7 | 168 | 3 | EB | 640,852486 | 59,89391 | 35,9%  | 29,9% | -6,0%  | 0,0006  | 8,58932 | 6,99E-05 |
| BPAP   | t7_EB3 | 7 | 168 | 3 | EB | 639,101475 | 37,17198 | 36,1%  | 32,4% | -3,7%  | 0,0006  | 8,58932 | 6,99E-05 |
| BPB    | t7_EB3 | 7 | 168 | 3 | EB | 643,357606 | 10,97521 | 35,7%  | 34,6% | -1,1%  | 0,0006  | 8,58932 | 6,99E-05 |
| BPBP   | t7_EB3 | 7 | 168 | 3 | EB | 268,53119  | 207,293  | 73,1%  | 52,4% | -20,7% | 0,0006  | 8,58932 | 6,99E-05 |
| BPC    | t7_EB3 | 7 | 168 | 3 | EB | 655,536332 | 15,60574 | 34,4%  | 32,9% | -1,6%  | 0,0006  | 8,58932 | 6,99E-05 |
| BPC2   | t7_EB3 | 7 | 168 | 3 | EB | 536,937861 | 37,79289 | 46,3%  | 42,5% | -3,8%  | 0,0006  | 8,58932 | 6,99E-05 |
| BPE    | t7_EB3 | 7 | 168 | 3 | EB | 591,411268 | 5,043628 | 40,9%  | 40,4% | -0,5%  | 0,0006  | 8,58932 | 6,99E-05 |
| BPFL   | t7_EB3 | 7 | 168 | 3 | EB | 282,226844 | 156,1636 | 71,8%  | 56,2% | -15,6% | 0,0006  | 8,58932 | 6,99E-05 |
| BPM    | t7_EB3 | 7 | 168 | 3 | EB | 122,652262 | 140,5869 | 87,7%  | 73,7% | -14,1% | 0,0006  | 8,58932 | 6,99E-05 |
| BPP    | t7_EB3 | 7 | 168 | 3 | EB | 62,5770292 | 155,0164 | 93,7%  | 78,2% | -15,5% | 0,0006  | 8,58932 | 6,99E-05 |
| BPPH   | t7_EB3 | 7 | 168 | 3 | EB | 54,8353695 | 264,344  | 94,5%  | 68,1% | -26,4% | 0,0006  | 8,58932 | 6,99E-05 |
| BPS    | t7_EB3 | 7 | 168 | 3 | EB | 756,062814 | 2,866932 | 24,4%  | 24,1% | -0,3%  | 0,0006  | 8,58932 | 6,99E-05 |
| BPZ    | t7_EB3 | 7 | 168 | 3 | EB | 688,514627 | 33,77546 | 31,1%  | 27,8% | -3,4%  | 0,0006  | 8,58932 | 6,99E-05 |
| 22BPF  | t7_EK1 | 7 | 168 | 1 | EK | 748,294208 | 8,670182 | 25,2%  | 24,3% | -0,9%  | 9,12116 | 1,72675 | 5,28227  |
| 24BPF  | t7_EK1 | 7 | 168 | 1 | EK | 635,618998 | 27,45921 | 36,4%  | 33,7% | -2,7%  | 9,12116 | 1,72675 | 5,28227  |
| 44BPF  | t7_EK1 | 7 | 168 | 1 | EK | 629,65517  | 15,18407 | 37,0%  | 35,5% | -1,5%  | 9,12116 | 1,72675 | 5,28227  |
| BP26DM | t7_EK1 | 7 | 168 | 1 | EK | 170,095955 | 22,45857 | 83,0%  | 80,7% | -2,2%  | 9,12116 | 1,72675 | 5,28227  |
| BPA    | t7_EK1 | 7 | 168 | 1 | EK | 622,891526 | 60,77271 | 37,7%  | 31,6% | -6,1%  | 9,12116 | 1,72675 | 5,28227  |
| BPAF   | t7_EK1 | 7 | 168 | 1 | EK | 793,07574  | 17,32324 | 20,7%  | 19,0% | -1,7%  | 9,12116 | 1,72675 | 5,28227  |
| BPAP   | t7_EK1 | 7 | 168 | 1 | EK | 654,679885 | 55,52876 | 34,5%  | 29,0% | -5,6%  | 9,12116 | 1,72675 | 5,28227  |
| BPB    | t7_EK1 | 7 | 168 | 1 | EK | 683,438655 | 41,71048 | 31,7%  | 27,5% | -4,2%  | 9,12116 | 1,72675 | 5,28227  |
| BPBP   | t7_EK1 | 7 | 168 | 1 | EK | 317,934757 | 209,4861 | 68,2%  | 47,3% | -20,9% | 9,12116 | 1,72675 | 5,28227  |
| BPC    | t7_EK1 | 7 | 168 | 1 | EK | 451,188632 | 50,98979 | 54,9%  | 49,8% | -5,1%  | 9,12116 | 1,72675 | 5,28227  |
| BPC2   | t7_EK1 | 7 | 168 | 1 | EK | 0,29347915 | 0,265447 | 100,0% | 99,9% | 0,0%   | 9,12116 | 1,72675 | 5,28227  |
| BPE    | t7_EK1 | 7 | 168 | 1 | EK | 666,507126 | 23,71317 | 33,3%  | 31,0% | -2,4%  | 9,12116 | 1,72675 | 5,28227  |
| BPFL   | t7_EK1 | 7 | 168 | 1 | EK | 303,766708 | 186,4579 | 69,6%  | 51,0% | -18,6% | 9,12116 | 1,72675 | 5,28227  |
| BPM    | t7_EK1 | 7 | 168 | 1 | EK | 208,482993 | 179,5361 | 79,2%  | 61,2% | -18,0% | 9,12116 | 1,72675 | 5,28227  |
| BPP    | t7_EK1 | 7 | 168 | 1 | EK | 116,452288 | 204,7872 | 88,4%  | 67,9% | -20,5% | 9,12116 | 1,72675 | 5,28227  |
| BPPH   | t7_EK1 | 7 | 168 | 1 | EK | 29,7847947 | 201,0009 | 97,0%  | 76,9% | -20,1% | 9,12116 | 1,72675 | 5,28227  |
| BPS    | t7_EK1 | 7 | 168 | 1 | EK | 584,357732 | 9,86919  | 41,6%  | 40,6% | -1,0%  | 9,12116 | 1,72675 | 5,28227  |
| BPZ    | t7_EK1 | 7 | 168 | 1 | EK | 594,896384 | 65,89899 | 40,5%  | 33,9% | -6,6%  | 9,12116 | 1,72675 | 5,28227  |
| 22BPF  | t7_EK2 | 7 | 168 | 2 | EK | 685,428305 | 7,254831 | 31,5%  | 30,7% | -0,7%  | 6,37355 | 2,11816 | 3,009003 |
| 24BPF  | t7_EK2 | 7 | 168 | 2 | EK | 566,57541  | 19,36754 | 43,3%  | 41,4% | -1,9%  | 6,37355 | 2,11816 | 3,009003 |
| 44BPF  | t7_EK2 | 7 | 168 | 2 | EK | 600,316889 | 12,78437 | 40,0%  | 38,7% | -1,3%  | 6,37355 | 2,11816 | 3,009003 |
| BP26DM | t7_EK2 | 7 | 168 | 2 | EK | 47,5083156 | 8,275856 | 95,2%  | 94,4% | -0,8%  | 6,37355 | 2,11816 | 3,009003 |
| BPA    | t7_EK2 | 7 | 168 | 2 | EK | 623,078853 | 47,704   | 37,7%  | 32,9% | -4,8%  | 6,37355 | 2,11816 | 3,009003 |
| BPAF   | t7_EK2 | 7 | 168 | 2 | EK | 768,994068 | 18,88698 | 23,1%  | 21,2% | -1,9%  | 6,37355 | 2,11816 | 3,009003 |
| BPAP   | t7_EK2 | 7 | 168 | 2 | EK | 653,767968 | 64,67823 | 34,6%  | 28,2% | -6,5%  | 6,37355 | 2,11816 | 3,009003 |
| BPB    | t7_EK2 | 7 | 168 | 2 | EK | 642,878939 | 40,26198 | 35,7%  | 31,7% | -4,0%  | 6,37355 | 2,11816 | 3,009003 |
| BPBP   | t7_EK2 | 7 | 168 | 2 | EK | 343,318871 | 208,8014 | 65,7%  | 44,8% | -20,9% | 6,37355 | 2,11816 | 3,009003 |
| BPC    | t7_EK2 | 7 | 168 | 2 | EK | 333,619175 | 35,74295 | 66,6%  | 63,1% | -3,6%  | 6,37355 | 2,11816 | 3,009003 |
| BPC2   | t7_EK2 | 7 | 168 | 2 | EK | 1,2162865  | 0,297803 | 99,9%  | 99,8% | 0,0%   | 6,37355 | 2,11816 | 3,009003 |
| BPE    | t7_EK2 | 7 | 168 | 2 | EK | 619,041731 | 18,88009 | 38,1%  | 36,2% | -1,9%  | 6,37355 | 2,11816 | 3,009003 |
| BPFL   | t7_EK2 | 7 | 168 | 2 | EK | 367,319696 | 225,8201 | 63,3%  | 40,7% | -22,6% | 6,37355 | 2,11816 | 3,009003 |
| BPM    | t7_EK2 | 7 | 168 | 2 | EK | 240,396327 | 196,9706 | 76,0%  | 56,3% | -19,7% | 6,37355 | 2,11816 | 3,009003 |
| BPP    | t7_EK2 | 7 | 168 | 2 | EK | 139,679721 | 220,2768 | 86,0%  | 64,0% | -22,0% | 6,37355 | 2,11816 | 3,009003 |
| BPPH   | t7_EK2 | 7 | 168 | 2 | EK | 35,7973201 | 197,9338 | 96,4%  | 76,6% | -19,8% | 6,37355 | 2,11816 | 3,009003 |
| BPS    | t7_EK2 | 7 | 168 | 2 | EK | 657,477878 | 5,594875 | 34,3%  | 33,7% | -0,6%  | 6,37355 | 2,11816 | 3,009003 |
| BPZ    | t7_EK2 | 7 | 168 | 2 | EK | 647,190866 | 67,07116 | 35,3%  | 28,6% | -6,7%  | 6,37355 | 2,11816 | 3,009003 |
| 22BPF  | t7_EK3 | 7 | 168 | 3 | EK | 733,271888 | 10,22277 | 26,7%  | 25,7% | -1,0%  | 7,35725 | 1,9023  | 3,867555 |
| 24BPF  | t7_EK3 | 7 | 168 | 3 | EK | 585,556156 | 23,44774 | 41,4%  | 39,1% | -2,3%  | 7,35725 | 1,9023  | 3,867555 |
| 44BPF  | t7_EK3 | 7 | 168 | 3 | EK | 616,061475 | 15,37562 | 38,4%  | 36,9% | -1,5%  | 7,35725 | 1,9023  | 3,867555 |
| BP26DM | t7_EK3 | 7 | 168 | 3 | EK | 69,2702206 | 9,422751 | 93,1%  | 92,1% | -0,9%  | 7,35725 | 1,9023  | 3,867555 |
| BPA    | t7_EK3 | 7 | 168 | 3 | EK | 641,664297 | 93,75296 | 35,8%  | 26,5% | -9,4%  | 7,35725 | 1,9023  | 3,867555 |
| BPAF   | t7_EK3 | 7 | 168 | 3 | EK | 809,861506 | 22,18927 | 19,0%  | 16,8% | -2,2%  | 7,35725 | 1,9023  | 3,867555 |
| BPAP   | t7_EK3 | 7 | 168 | 3 | EK | 659,799565 | 65,08708 | 34,0%  | 27,5% | -6,5%  | 7,35725 | 1,9023  | 3,867555 |
| BPB    | t7_EK3 | 7 | 168 | 3 | EK | 653,495334 | 40,94774 | 34,7%  | 30,6% | -4,1%  | 7,35725 | 1,9023  | 3,867555 |
| BPBP   | t7_EK3 | 7 | 168 | 3 | EK | 301,268384 | 201,9527 | 69,9%  | 49,7% | -20,2% | 7,35725 | 1,9023  | 3,867555 |
| BPC    | t7_EK3 | 7 | 168 | 3 | EK | 361,689795 | 39,38958 | 63,8%  | 59,9% | -3,9%  | 7,35725 | 1,9023  | 3,867555 |

|      |        |   |       |    |            |          |       |       |        |         |        |          |
|------|--------|---|-------|----|------------|----------|-------|-------|--------|---------|--------|----------|
| BPC2 | t7_EK3 | 7 | 168 3 | EK | 0,74078582 | 0,282622 | 99,9% | 99,9% | 0,0%   | 7,35725 | 1,9023 | 3,867555 |
| BPE  | t7_EK3 | 7 | 168 3 | EK | 642,423324 | 24,09817 | 35,8% | 33,3% | -2,4%  | 7,35725 | 1,9023 | 3,867555 |
| BPFL | t7_EK3 | 7 | 168 3 | EK | 314,257516 | 214,3244 | 68,6% | 47,1% | -21,4% | 7,35725 | 1,9023 | 3,867555 |
| BPM  | t7_EK3 | 7 | 168 3 | EK | 216,646519 | 183,8652 | 78,3% | 59,9% | -18,4% | 7,35725 | 1,9023 | 3,867555 |
| BPP  | t7_EK3 | 7 | 168 3 | EK | 120,669197 | 204,9103 | 87,9% | 67,4% | -20,5% | 7,35725 | 1,9023 | 3,867555 |
| BPPH | t7_EK3 | 7 | 168 3 | EK | 28,7334446 | 175,2602 | 97,1% | 79,6% | -17,5% | 7,35725 | 1,9023 | 3,867555 |
| BPS  | t7_EK3 | 7 | 168 3 | EK | 653,818497 | 11,26483 | 34,6% | 33,5% | -1,1%  | 7,35725 | 1,9023 | 3,867555 |
| BPZ  | t7_EK3 | 7 | 168 3 | EK | 585,483866 | 67,78093 | 41,5% | 34,7% | -6,8%  | 7,35725 | 1,9023 | 3,867555 |

Table S3. GenBank (NCBI) output for identification of Gram-negative bacilli isolated from microalgal cultures. Query coverage, E value and percent identity for the 16S ribosomal RNA contig of both bacterial isolates.

| Description                                                                                         | Scientific Name                           | Max Score | Total Score | Query Cover | E value | Per. Ident | Acc. Len | Accession  | Description                                                                                | Scientific Name                    | Max Score | Total Score | Query Cover | E value | Per. Ident | Acc. Len | Accession  |
|-----------------------------------------------------------------------------------------------------|-------------------------------------------|-----------|-------------|-------------|---------|------------|----------|------------|--------------------------------------------------------------------------------------------|------------------------------------|-----------|-------------|-------------|---------|------------|----------|------------|
| Thalassospira sp. AU193_Ted1_R2A partial 16S rRNA gene, isolate AU193_Ted1_R2A                      | Thalassospira sp. AU193_Ted1_R2A          | 695       | 695         | 99%         | 0.0     | 99.47%     | 735      | LN909101.1 | Thalassospira sp. strain B30-1 16S ribosomal RNA gene, partial sequence                    | Thalassospira sp.                  | 695       | 695         | 99%         | 0.0     | 99.47%     | 1490     | ON600594.1 |
| Thalassospira xiamenensis strain CSE_33 16S ribosomal RNA gene, partial sequence                    | Thalassospira xiamenensis                 | 695       | 695         | 99%         | 0.0     | 99.47%     | 1386     | KX027359.1 | Thalassospiraceae bacterium SW-3-3 chromosome, complete genome                             | Thalassospiraceae bacterium SW-3-3 | 695       | 2781        | 99%         | 0.0     | 99.47%     | 4764478  | CP091912.1 |
| Thalassospira permensis strain CSE_28 16S ribosomal RNA gene, partial sequence                      | Thalassospira permensis                   | 695       | 695         | 99%         | 0.0     | 99.47%     | 1400     | KX027356.1 | Thalassospira sp. MCCC1A07747 16S ribosomal RNA gene, partial sequence                     | Thalassospira sp. MCCC1A07747      | 695       | 695         | 99%         | 0.0     | 99.47%     | 924      | KJ956978.1 |
| Thalassospira permensis strain CSE_27 16S ribosomal RNA gene, partial sequence                      | Thalassospira permensis                   | 695       | 695         | 99%         | 0.0     | 99.47%     | 1382     | KX027355.1 | Thalassospira sp. MCCC1A07528 16S ribosomal RNA gene, partial sequence                     | Thalassospira sp. MCCC1A07528      | 695       | 695         | 99%         | 0.0     | 99.47%     | 930      | KJ956945.1 |
| Thalassospira sp. CSE_4 16S ribosomal RNA gene, partial sequence                                    | Thalassospira sp. CSE_4                   | 695       | 695         | 99%         | 0.0     | 99.47%     | 1391     | KX027340.1 | Thalassospira sp. MCCC1A07749 16S ribosomal RNA gene, partial sequence                     | Thalassospira sp. MCCC1A07749      | 695       | 695         | 99%         | 0.0     | 99.47%     | 929      | KJ956937.1 |
| Thalassospira sp. CPA-6 16S ribosomal RNA gene, partial sequence                                    | Thalassospira sp. CPA-6                   | 695       | 695         | 99%         | 0.0     | 99.47%     | 970      | KT324754.1 | Thalassospira permensis genomic DNA containing 16S-23S intergenic spacer region, strain R9 | Thalassospira permensis            | 695       | 695         | 99%         | 0.0     | 99.47%     | 991      | LK934702.1 |
| Thalassospira sp. CPA-4 16S ribosomal RNA gene, partial sequence                                    | Thalassospira sp. CPA-4                   | 695       | 695         | 99%         | 0.0     | 99.47%     | 999      | KT324752.1 | Uncultured bacterium clone HXF_1_83 16S ribosomal RNA gene, partial sequence               | uncultured bacterium               | 695       | 695         | 99%         | 0.0     | 99.47%     | 1457     | KJ814181.1 |
| Thalassospira sp. C2 16S ribosomal RNA gene, partial sequence                                       | Thalassospira sp. C2                      | 695       | 695         | 99%         | 0.0     | 99.47%     | 750      | KT715766.1 | Uncultured bacterium clone HXF_1_81 16S ribosomal RNA gene, partial sequence               | uncultured bacterium               | 695       | 695         | 99%         | 0.0     | 99.47%     | 1457     | KJ814179.1 |
| Thalassospira sp. R18-4 16S ribosomal RNA gene, partial sequence                                    | Thalassospira sp. R18-4                   | 695       | 695         | 99%         | 0.0     | 99.47%     | 1384     | KT429721.1 | Uncultured bacterium clone HXF_1_71 16S ribosomal RNA gene, partial sequence               | uncultured bacterium               | 695       | 695         | 99%         | 0.0     | 99.47%     | 1457     | KJ814171.1 |
| Uncultured bacterium partial 16S rRNA gene, clone EE3-1_F09                                         | uncultured bacterium                      | 695       | 695         | 99%         | 0.0     | 99.47%     | 955      | LM651980.1 | Uncultured bacterium clone HXF_1_70 16S ribosomal RNA gene, partial sequence               | uncultured bacterium               | 695       | 695         | 99%         | 0.0     | 99.47%     | 1456     | KJ814170.1 |
| Thalassospira permensis strain I-A-E-11 16S ribosomal RNA gene, partial sequence                    | Thalassospira permensis                   | 695       | 695         | 99%         | 0.0     | 99.47%     | 1397     | KT922024.1 | Uncultured bacterium clone HXF_1_67 16S ribosomal RNA gene, partial sequence               | uncultured bacterium               | 695       | 695         | 99%         | 0.0     | 99.47%     | 1456     | KJ814168.1 |
| Thalassospira sp. H2-74 16S ribosomal RNA gene, partial sequence                                    | Thalassospira sp. H2-74                   | 695       | 695         | 99%         | 0.0     | 99.47%     | 1276     | KM979195.1 | Uncultured bacterium clone HXF_1_55 16S ribosomal RNA gene, partial sequence               | uncultured bacterium               | 695       | 695         | 99%         | 0.0     | 99.47%     | 1456     | KJ814159.1 |
| Thalassospira sp. R-52913 16S ribosomal RNA gene, partial sequence                                  | Thalassospira sp. R-52913                 | 695       | 695         | 99%         | 0.0     | 99.47%     | 1465     | KT185151.1 | Uncultured bacterium clone HXF_1_48 16S ribosomal RNA gene, partial sequence               | uncultured bacterium               | 695       | 695         | 99%         | 0.0     | 99.47%     | 1456     | KJ814153.1 |
| Thalassospira sp. R-52699 16S ribosomal RNA gene, partial sequence                                  | Thalassospira sp. R-52699                 | 695       | 695         | 99%         | 0.0     | 99.47%     | 1408     | KT185150.1 | Uncultured bacterium clone HXF_1_37 16S ribosomal RNA gene, partial sequence               | uncultured bacterium               | 695       | 695         | 99%         | 0.0     | 99.47%     | 1456     | KJ814144.1 |
| Thalassospira sp. AMJ01 16S ribosomal RNA gene, partial sequence                                    | Thalassospira sp. AMJ01                   | 695       | 695         | 99%         | 0.0     | 99.47%     | 1350     | KT443869.1 | Uncultured bacterium clone HXF_1_35 16S ribosomal RNA gene, partial sequence               | uncultured bacterium               | 695       | 695         | 99%         | 0.0     | 99.47%     | 1458     | KJ814142.1 |
| Thalassospira sp. SLG510B2-7-1 16S ribosomal RNA gene, partial sequence                             | Thalassospira sp. SLG510B2-7-1            | 695       | 695         | 99%         | 0.0     | 99.47%     | 1138     | KP711622.1 | Uncultured bacterium clone HXF_1_17 16S ribosomal RNA gene, partial sequence               | uncultured bacterium               | 695       | 695         | 99%         | 0.0     | 99.47%     | 1457     | KJ814127.1 |
| Uncultured marine bacterium clone BS_ConstataExp_T55h_A_F2 16S ribosomal RNA gene, partial sequence | uncultured marine bacterium               | 695       | 695         | 99%         | 0.0     | 99.47%     | 1127     | KR054235.1 | Uncultured bacterium clone HXF_1_105 16S ribosomal RNA gene, partial sequence              | uncultured bacterium               | 695       | 695         | 99%         | 0.0     | 99.47%     | 1457     | KJ814117.1 |
| Uncultured deep-sea bacterium clone Lau26_TahitiMoana 16S ribosomal RNA gene, partial sequence      | uncultured deep-sea bacterium             | 695       | 695         | 99%         | 0.0     | 99.47%     | 900      | KP005030.1 | Uncultured bacterium clone HXF_1_101 16S ribosomal RNA gene, partial sequence              | uncultured bacterium               | 695       | 695         | 99%         | 0.0     | 99.47%     | 1456     | KJ814114.1 |
| Marine bacterium VA003 16S ribosomal RNA gene, partial sequence                                     | marine bacterium VA003                    | 695       | 695         | 99%         | 0.0     | 99.47%     | 1338     | KJ814519.1 | Uncultured bacterium clone HXF_2_85 16S ribosomal RNA gene, partial sequence               | uncultured bacterium               | 695       | 695         | 99%         | 0.0     | 99.47%     | 1432     | KJ814099.1 |
| Bacterium RFB C06 partial 16S rRNA gene, isolate RFB C06                                            | bacterium RFB C06                         | 695       | 695         | 99%         | 0.0     | 99.47%     | 1229     | LN681278.1 | Uncultured bacterium clone HXF_2_71 16S ribosomal RNA gene, partial sequence               | uncultured bacterium               | 695       | 695         | 99%         | 0.0     | 99.47%     | 1456     | KJ814090.1 |
| Thalassospira xiamenensis M-5 = DSM 17429, complete genome                                          | Thalassospira xiamenensis M-5 = DSM 17429 | 695       | 2781        | 99%         | 0.0     | 99.47%     | 4576570  | CP004388.1 | Uncultured bacterium clone HXF_2_42 16S ribosomal RNA gene, partial sequence               | uncultured bacterium               | 695       | 695         | 99%         | 0.0     | 99.47%     | 1457     | KJ814063.1 |
| Thalassospira permensis strain ROD131 16S ribosomal RNA gene, partial sequence                      | Thalassospira permensis                   | 695       | 695         | 99%         | 0.0     | 99.47%     | 1369     | ON878087.1 | Uncultured bacterium clone HXF_2_33 16S ribosomal RNA gene, partial sequence               | uncultured bacterium               | 695       | 695         | 99%         | 0.0     | 99.47%     | 1457     | KJ814055.1 |
| Thalassospira sp. strain B31-4 16S ribosomal RNA gene, partial sequence                             | Thalassospira sp.                         | 695       | 695         | 99%         | 0.0     | 99.47%     | 1289     | ON619592.1 | Uncultured bacterium clone HXF_2_30 16S ribosomal RNA gene, partial sequence               | uncultured bacterium               | 695       | 695         | 99%         | 0.0     | 99.47%     | 1457     | KJ814053.1 |
|                                                                                                     |                                           |           |             |             |         |            |          |            | Uncultured bacterium clone HXF_2_16 16S ribosomal RNA gene, partial sequence               | uncultured bacterium               | 695       | 695         | 99%         | 0.0     | 99.47%     | 1456     | KJ814037.1 |
